# Supplementary material for: A plasmid locus associated with Klebsiella clinical infections encodes a microbiome-dependent gut fitness factor
Source: PLoS Pathog. 2021 Apr 30;17(4):e1009537. doi: 10.1371/journal.ppat.1009537 (PMC8115787; doi:10.1371/journal.ppat.1009537)
Supplement: S2 Data — (XLSX) [file ppat.1009537.s036.xlsx]

## Sheet: OTU taxonomy
16S rRNA gene sequncing taxonomy
OTU	Size	Taxonomy
Otu0001	1709004	Bacteria(100);Proteobacteria(100);Gammaproteobacteria(100);Enterobacteriales(100);Enterobacteriaceae(100);Enterobacteriaceae_unclassified(100);
Otu0002	675261	Bacteria(100);Bacteroidetes(100);Bacteroidia(100);Bacteroidales(100);Porphyromonadaceae(100);Porphyromonadaceae_unclassified(100);
Otu0003	606606	Bacteria(100);Bacteroidetes(100);Bacteroidia(100);Bacteroidales(100);Bacteroidaceae(100);Bacteroides(100);
Otu0004	526536	Bacteria(100);Bacteroidetes(100);Bacteroidia(100);Bacteroidales(100);Porphyromonadaceae(100);Porphyromonadaceae_unclassified(100);
Otu0005	331236	Bacteria(100);Verrucomicrobia(100);Verrucomicrobiae(100);Verrucomicrobiales(100);Verrucomicrobiaceae(100);Akkermansia(100);
Otu0006	262952	Bacteria(100);Firmicutes(100);Bacilli(100);Lactobacillales(100);Lactobacillaceae(100);Lactobacillus(100);
Otu0007	262683	Bacteria(100);Firmicutes(100);Erysipelotrichia(100);Erysipelotrichales(100);Erysipelotrichaceae(100);Turicibacter(100);
Otu0008	168756	Bacteria(100);Bacteroidetes(100);Bacteroidia(100);Bacteroidales(100);Porphyromonadaceae(100);Porphyromonadaceae_unclassified(100);
Otu0009	131697	Bacteria(100);Bacteroidetes(100);Bacteroidia(100);Bacteroidales(100);Porphyromonadaceae(100);Porphyromonadaceae_unclassified(100);
Otu0010	113312	Bacteria(100);Tenericutes(100);Mollicutes(100);Anaeroplasmatales(100);Anaeroplasmataceae(100);Anaeroplasma(100);
Otu0011	100518	Bacteria(100);Firmicutes(100);Clostridia(100);Clostridiales(100);Lachnospiraceae(100);Lachnospiraceae_unclassified(100);
Otu0012	89705	Bacteria(100);Firmicutes(100);Clostridia(100);Clostridiales(100);Lachnospiraceae(100);Lachnospiraceae_unclassified(91);
Otu0013	83920	Bacteria(100);Bacteroidetes(100);Bacteroidia(100);Bacteroidales(100);Rikenellaceae(100);Alistipes(100);
Otu0014	75918	Bacteria(100);Firmicutes(100);Firmicutes_unclassified(92);Firmicutes_unclassified(92);Firmicutes_unclassified(92);Firmicutes_unclassified(92);
Otu0015	72391	Bacteria(100);Firmicutes(100);Clostridia(100);Clostridiales(100);Ruminococcaceae(100);Oscillibacter(100);
Otu0016	72228	Bacteria(100);Firmicutes(100);Bacilli(100);Lactobacillales(100);Enterococcaceae(100);Enterococcus(100);
Otu0017	72151	Bacteria(100);Proteobacteria(100);Betaproteobacteria(100);Burkholderiales(100);Sutterellaceae(100);Parasutterella(100);
Otu0018	69515	Bacteria(100);Bacteroidetes(100);Bacteroidia(100);Bacteroidales(100);Porphyromonadaceae(100);Porphyromonadaceae_unclassified(100);
Otu0019	66822	Bacteria(100);Bacteroidetes(100);Bacteroidia(100);Bacteroidales(100);Porphyromonadaceae(100);Porphyromonadaceae_unclassified(100);
Otu0020	66603	Bacteria(100);Firmicutes(100);Clostridia(100);Clostridiales(100);Lachnospiraceae(100);Lachnospiraceae_unclassified(100);
Otu0021	61513	Bacteria(100);Firmicutes(100);Clostridia(100);Clostridiales(100);Lachnospiraceae(100);Lachnospiraceae_unclassified(100);
Otu0022	53506	Bacteria(100);Firmicutes(100);Clostridia(100);Clostridiales(100);Clostridiaceae_1(100);Clostridium_sensu_stricto(100);
Otu0023	53260	Bacteria(100);Firmicutes(100);Clostridia(100);Clostridiales(100);Clostridiales_unclassified(93);Clostridiales_unclassified(93);
Otu0024	51581	Bacteria(100);Firmicutes(100);Clostridia(100);Clostridiales(100);Ruminococcaceae(100);Ruminococcus(100);
Otu0025	51042	Bacteria(100);Firmicutes(100);Clostridia(100);Clostridiales(100);Lachnospiraceae(100);Lachnospiraceae_unclassified(100);
Otu0026	50966	Bacteria(100);Firmicutes(100);Clostridia(100);Clostridiales(100);Lachnospiraceae(100);Lachnospiraceae_unclassified(100);
Otu0027	49737	Bacteria(100);Firmicutes(100);Clostridia(100);Clostridiales(100);Lachnospiraceae(100);Lachnospiraceae_unclassified(100);
Otu0028	46434	Bacteria(100);Firmicutes(100);Clostridia(100);Clostridiales(100);Clostridiales_unclassified(100);Clostridiales_unclassified(100);
Otu0029	43030	Bacteria(100);Firmicutes(100);Clostridia(100);Clostridiales(100);Ruminococcaceae(100);Ruminococcaceae_unclassified(100);
Otu0030	41223	Bacteria(100);Firmicutes(100);Clostridia(100);Clostridiales(100);Lachnospiraceae(100);Lachnospiraceae_unclassified(100);
Otu0031	39514	Bacteria(100);Firmicutes(100);Clostridia(100);Clostridiales(100);Lachnospiraceae(100);Lachnospiraceae_unclassified(100);
Otu0032	38098	Bacteria(100);Bacteria_unclassified(100);Bacteria_unclassified(100);Bacteria_unclassified(100);Bacteria_unclassified(100);Bacteria_unclassified(100);
Otu0033	37857	Bacteria(100);Firmicutes(100);Clostridia(100);Clostridiales(100);Ruminococcaceae(100);Ruminococcaceae_unclassified(100);
Otu0034	32798	Bacteria(100);Firmicutes(100);Clostridia(100);Clostridiales(100);Lachnospiraceae(100);Lachnospiraceae_unclassified(100);
Otu0035	32565	Bacteria(100);Firmicutes(100);Clostridia(100);Clostridiales(100);Clostridiales_unclassified(100);Clostridiales_unclassified(100);
Otu0036	32073	Bacteria(100);Firmicutes(100);Clostridia(100);Clostridiales(100);Lachnospiraceae(100);Lachnospiraceae_unclassified(100);
Otu0037	30011	Bacteria(100);Actinobacteria(100);Actinobacteria(100);Coriobacteriales(100);Coriobacteriaceae(100);Olsenella(100);
Otu0038	29070	Bacteria(100);Firmicutes(100);Clostridia(100);Clostridiales(100);Clostridiales_unclassified(100);Clostridiales_unclassified(100);
Otu0039	28977	Bacteria(100);Firmicutes(100);Clostridia(100);Clostridiales(100);Clostridiales_unclassified(100);Clostridiales_unclassified(100);
Otu0040	28903	Bacteria(100);Firmicutes(100);Clostridia(100);Clostridiales(100);Lachnospiraceae(100);Lachnospiraceae_unclassified(100);
Otu0041	27918	Bacteria(100);Firmicutes(100);Clostridia(100);Clostridiales(100);Lachnospiraceae(100);Lachnospiraceae_unclassified(100);
Otu0042	26139	Bacteria(100);Firmicutes(100);Clostridia(100);Clostridiales(100);Lachnospiraceae(100);Lachnospiraceae_unclassified(100);
Otu0043	25409	Bacteria(100);Firmicutes(100);Clostridia(100);Clostridiales(100);Lachnospiraceae(100);Lachnospiraceae_unclassified(100);
Otu0044	23146	Bacteria(100);Firmicutes(100);Clostridia(100);Clostridiales(100);Ruminococcaceae(100);Pseudoflavonifractor(88);
Otu0045	21942	Bacteria(100);Firmicutes(100);Clostridia(100);Clostridiales(100);Lachnospiraceae(100);Lachnospiraceae_unclassified(100);
Otu0046	21628	Bacteria(100);Firmicutes(100);Clostridia(100);Clostridiales(100);Ruminococcaceae(100);Ruminococcaceae_unclassified(100);
Otu0047	21582	Bacteria(100);Firmicutes(100);Clostridia(100);Clostridiales(100);Lachnospiraceae(100);Clostridium_XlVa(51);
Otu0048	21158	Bacteria(100);Firmicutes(100);Clostridia(100);Clostridiales(100);Lachnospiraceae(100);Lachnospiraceae_unclassified(100);
Otu0049	21133	Bacteria(100);Firmicutes(100);Clostridia(100);Clostridiales(100);Lachnospiraceae(100);Lachnospiraceae_unclassified(100);
Otu0050	20542	Bacteria(100);Firmicutes(100);Clostridia(100);Clostridiales(100);Peptostreptococcaceae(100);Romboutsia(100);
Otu0051	20058	Bacteria(100);Firmicutes(100);Clostridia(100);Clostridiales(100);Ruminococcaceae(100);Oscillibacter(100);
Otu0052	19787	Bacteria(100);Firmicutes(100);Bacilli(100);Bacillales(100);Staphylococcaceae(100);Staphylococcus(95);
Otu0053	19506	Bacteria(100);Firmicutes(100);Bacilli(100);Lactobacillales(100);Streptococcaceae(100);Streptococcus(100);
Otu0054	18733	Bacteria(100);Firmicutes(100);Clostridia(100);Clostridiales(100);Ruminococcaceae(100);Ruminococcaceae_unclassified(97);
Otu0055	18371	Bacteria(100);Firmicutes(100);Clostridia(100);Clostridiales(100);Lachnospiraceae(100);Lachnospiraceae_unclassified(100);
Otu0056	17472	Bacteria(100);Firmicutes(100);Clostridia(100);Clostridiales(100);Lachnospiraceae(100);Lachnospiraceae_unclassified(100);
Otu0057	16906	Bacteria(100);Firmicutes(100);Clostridia(100);Clostridiales(100);Lachnospiraceae(100);Lachnospiraceae_unclassified(100);
Otu0058	16860	Bacteria(100);Actinobacteria(100);Actinobacteria(100);Coriobacteriales(100);Coriobacteriaceae(100);Asaccharobacter(96);
Otu0059	16701	Bacteria(100);Firmicutes(100);Clostridia(100);Clostridiales(100);Lachnospiraceae(100);Acetatifactor(100);
Otu0060	16675	Bacteria(100);Firmicutes(100);Clostridia(100);Clostridiales(100);Ruminococcaceae(100);Ruminococcaceae_unclassified(100);
Otu0061	16408	Bacteria(100);Firmicutes(100);Clostridia(100);Clostridiales(100);Lachnospiraceae(100);Lachnospiraceae_unclassified(100);
Otu0062	16298	Bacteria(100);Firmicutes(100);Clostridia(100);Clostridiales(100);Clostridiales_unclassified(100);Clostridiales_unclassified(100);
Otu0063	15802	Bacteria(100);Firmicutes(100);Clostridia(100);Clostridiales(100);Lachnospiraceae(100);Lachnospiraceae_unclassified(100);
Otu0064	15802	Bacteria(100);Firmicutes(100);Erysipelotrichia(100);Erysipelotrichales(100);Erysipelotrichaceae(100);Erysipelotrichaceae_unclassified(100);
Otu0065	15779	Bacteria(100);Firmicutes(100);Clostridia(100);Clostridiales(100);Ruminococcaceae(100);Ruminococcaceae_unclassified(100);
Otu0066	15450	Bacteria(100);Firmicutes(100);Clostridia(100);Clostridiales(100);Lachnospiraceae(100);Dorea(97);
Otu0067	14826	Bacteria(100);Firmicutes(100);Clostridia(100);Clostridiales(100);Lachnospiraceae(100);Lachnospiraceae_unclassified(100);
Otu0068	14208	Bacteria(100);Firmicutes(100);Clostridia(100);Clostridiales(100);Lachnospiraceae(100);Acetatifactor(100);
Otu0069	13982	Bacteria(100);Firmicutes(100);Clostridia(100);Clostridiales(100);Lachnospiraceae(100);Lachnospiraceae_unclassified(100);
Otu0070	13343	Bacteria(100);Firmicutes(100);Clostridia(100);Clostridiales(100);Ruminococcaceae(100);Ruminococcaceae_unclassified(100);
Otu0071	13052	Bacteria(100);Firmicutes(100);Clostridia(100);Clostridiales(100);Lachnospiraceae(100);Lachnospiraceae_unclassified(100);
Otu0072	12899	Bacteria(100);Firmicutes(100);Clostridia(100);Clostridiales(100);Clostridiales_unclassified(100);Clostridiales_unclassified(100);
Otu0073	12770	Bacteria(100);Firmicutes(100);Clostridia(100);Clostridiales(100);Lachnospiraceae(100);Lachnospiraceae_unclassified(100);
Otu0074	12464	Bacteria(100);Firmicutes(100);Clostridia(100);Clostridiales(100);Lachnospiraceae(100);Clostridium_XlVb(100);
Otu0075	12273	Bacteria(100);Firmicutes(100);Clostridia(100);Clostridia_unclassified(100);Clostridia_unclassified(100);Clostridia_unclassified(100);
Otu0076	11703	Bacteria(100);Firmicutes(100);Clostridia(100);Clostridiales(100);Ruminococcaceae(100);Ruminococcaceae_unclassified(100);
Otu0077	11459	Bacteria(100);Firmicutes(100);Clostridia(100);Clostridiales(100);Lachnospiraceae(100);Lachnospiraceae_unclassified(100);
Otu0078	10939	Bacteria(100);Firmicutes(100);Clostridia(100);Clostridiales(100);Lachnospiraceae(100);Lachnospiraceae_unclassified(100);
Otu0079	10178	Bacteria(100);Firmicutes(100);Clostridia(100);Clostridiales(100);Lachnospiraceae(100);Lachnospiraceae_unclassified(100);
Otu0080	10090	Bacteria(100);Firmicutes(100);Clostridia(100);Clostridiales(100);Lachnospiraceae(100);Lachnospiraceae_unclassified(100);
Otu0081	9996	Bacteria(100);Firmicutes(100);Clostridia(100);Clostridiales(100);Lachnospiraceae(100);Lachnospiraceae_unclassified(100);
Otu0082	9580	Bacteria(100);Firmicutes(100);Clostridia(100);Clostridiales(100);Lachnospiraceae(100);Clostridium_XlVb(100);
Otu0083	9555	Bacteria(100);Firmicutes(100);Clostridia(100);Clostridiales(100);Clostridiales_unclassified(100);Clostridiales_unclassified(100);
Otu0084	9439	Bacteria(100);Firmicutes(100);Clostridia(100);Clostridiales(100);Lachnospiraceae(100);Lachnospiraceae_unclassified(100);
Otu0085	8965	Bacteria(100);Firmicutes(100);Clostridia(100);Clostridiales(100);Lachnospiraceae(100);Lachnospiraceae_unclassified(100);
Otu0086	8895	Bacteria(100);Firmicutes(100);Clostridia(100);Clostridiales(100);Lachnospiraceae(100);Acetatifactor(100);
Otu0087	8892	Bacteria(100);Firmicutes(100);Clostridia(100);Clostridiales(100);Clostridiales_unclassified(100);Clostridiales_unclassified(100);
Otu0088	8830	Bacteria(100);Firmicutes(100);Erysipelotrichia(100);Erysipelotrichales(100);Erysipelotrichaceae(100);Clostridium_XVIII(100);
Otu0089	8787	Bacteria(100);Firmicutes(100);Clostridia(100);Clostridiales(100);Clostridiales_unclassified(100);Clostridiales_unclassified(100);
Otu0090	8585	Bacteria(100);Actinobacteria(100);Actinobacteria(100);Coriobacteriales(100);Coriobacteriaceae(100);Coriobacteriaceae_unclassified(100);
Otu0091	8543	Bacteria(100);Firmicutes(100);Clostridia(100);Clostridiales(100);Lachnospiraceae(100);Lachnospiraceae_unclassified(100);
Otu0092	8330	Bacteria(100);Firmicutes(100);Clostridia(100);Clostridiales(100);Clostridiales_unclassified(100);Clostridiales_unclassified(100);
Otu0093	8200	Bacteria(100);Firmicutes(100);Clostridia(99);Clostridiales(99);Clostridiales_unclassified(99);Clostridiales_unclassified(99);
Otu0094	8197	Bacteria(100);Firmicutes(100);Clostridia(100);Clostridiales(100);Lachnospiraceae(100);Lachnospiraceae_unclassified(90);
Otu0095	8095	Bacteria(100);Firmicutes(100);Clostridia(100);Clostridiales(100);Lachnospiraceae(100);Lachnospiraceae_unclassified(100);
Otu0096	8046	Bacteria(100);Firmicutes(100);Clostridia(100);Clostridiales(100);Lachnospiraceae(100);Lachnospiraceae_unclassified(100);
Otu0097	7532	Bacteria(100);Firmicutes(100);Clostridia(100);Clostridiales(100);Lachnospiraceae(100);Lachnospiraceae_unclassified(100);
Otu0098	7523	Bacteria(100);Firmicutes(100);Clostridia(100);Clostridiales(100);Clostridiales_unclassified(100);Clostridiales_unclassified(100);
Otu0099	7465	Bacteria(100);Firmicutes(100);Clostridia(100);Clostridiales(100);Lachnospiraceae(100);Lachnospiraceae_unclassified(100);
Otu0100	7423	Bacteria(100);Firmicutes(100);Clostridia(100);Clostridiales(100);Lachnospiraceae(100);Lachnospiraceae_unclassified(100);
Otu0101	7375	Bacteria(100);Firmicutes(100);Clostridia(100);Clostridiales(100);Lachnospiraceae(100);Acetatifactor(66);
Otu0102	7242	Bacteria(100);Bacteria_unclassified(100);Bacteria_unclassified(100);Bacteria_unclassified(100);Bacteria_unclassified(100);Bacteria_unclassified(100);
Otu0103	7097	Bacteria(100);Bacteria_unclassified(100);Bacteria_unclassified(100);Bacteria_unclassified(100);Bacteria_unclassified(100);Bacteria_unclassified(100);
Otu0104	7077	Bacteria(100);Firmicutes(100);Clostridia(100);Clostridiales(100);Ruminococcaceae(100);Ruminococcaceae_unclassified(100);
Otu0105	6946	Bacteria(100);Firmicutes(100);Clostridia(100);Clostridiales(100);Lachnospiraceae(100);Lachnospiraceae_unclassified(100);
Otu0106	6779	Bacteria(100);Firmicutes(100);Clostridia(100);Clostridiales(100);Clostridiales_unclassified(100);Clostridiales_unclassified(100);
Otu0107	6677	Bacteria(100);Firmicutes(100);Clostridia(100);Clostridiales(100);Lachnospiraceae(100);Lachnospiraceae_unclassified(100);
Otu0108	6589	Bacteria(100);Firmicutes(100);Clostridia(100);Clostridiales(100);Lachnospiraceae(100);Dorea(100);
Otu0109	6553	Bacteria(100);Firmicutes(100);Clostridia(100);Clostridiales(100);Ruminococcaceae(99);Ruminococcaceae_unclassified(99);
Otu0110	6465	Bacteria(100);Firmicutes(100);Clostridia(100);Clostridiales(100);Lachnospiraceae(100);Lachnospiraceae_unclassified(100);
Otu0111	6346	Bacteria(100);Firmicutes(100);Clostridia(100);Clostridiales(100);Lachnospiraceae(100);Lachnospiraceae_unclassified(100);
Otu0112	6331	Bacteria(100);Firmicutes(100);Clostridia(100);Clostridiales(100);Lachnospiraceae(100);Lachnospiraceae_unclassified(100);
Otu0113	6280	Bacteria(100);Firmicutes(100);Clostridia(100);Clostridiales(100);Peptostreptococcaceae(100);Terrisporobacter(100);
Otu0114	6268	Bacteria(100);Firmicutes(100);Clostridia(100);Clostridiales(100);Lachnospiraceae(100);Lachnospiraceae_unclassified(100);
Otu0115	6224	Bacteria(100);Bacteria_unclassified(100);Bacteria_unclassified(100);Bacteria_unclassified(100);Bacteria_unclassified(100);Bacteria_unclassified(100);
Otu0116	5917	Bacteria(100);Firmicutes(100);Clostridia(100);Clostridiales(100);Lachnospiraceae(100);Lachnospiraceae_unclassified(100);
Otu0117	5908	Bacteria(100);Firmicutes(100);Bacilli(100);Lactobacillales(100);Leuconostocaceae(100);Weissella(100);
Otu0118	5885	Bacteria(100);Firmicutes(100);Clostridia(100);Clostridiales(100);Lachnospiraceae(100);Lachnospiraceae_unclassified(100);
Otu0119	5842	Bacteria(100);Firmicutes(100);Clostridia(100);Clostridiales(100);Ruminococcaceae(100);Pseudoflavonifractor(100);
Otu0120	5795	Bacteria(100);Firmicutes(100);Clostridia(100);Clostridiales(100);Ruminococcaceae(100);Ruminococcaceae_unclassified(100);
Otu0121	5746	Bacteria(100);Firmicutes(100);Clostridia(83);Clostridiales(83);Clostridiales_unclassified(83);Clostridiales_unclassified(83);
Otu0122	5724	Bacteria(100);Firmicutes(100);Clostridia(100);Clostridiales(100);Lachnospiraceae(100);Lachnospiraceae_unclassified(100);
Otu0123	5720	Bacteria(100);Firmicutes(100);Clostridia(100);Clostridiales(100);Lachnospiraceae(100);Lachnospiraceae_unclassified(100);
Otu0124	5679	Bacteria(100);Firmicutes(100);Clostridia(100);Clostridiales(100);Lachnospiraceae(100);Lachnospiraceae_unclassified(100);
Otu0125	5652	Bacteria(100);Firmicutes(100);Clostridia(100);Clostridiales(100);Clostridiales_unclassified(100);Clostridiales_unclassified(100);
Otu0126	5628	Bacteria(100);Firmicutes(100);Clostridia(100);Clostridiales(100);Lachnospiraceae(100);Roseburia(97);
Otu0127	5597	Bacteria(100);Firmicutes(100);Clostridia(100);Clostridiales(100);Lachnospiraceae(100);Lachnospiraceae_unclassified(100);
Otu0128	5395	Bacteria(100);Firmicutes(100);Clostridia(100);Clostridiales(100);Lachnospiraceae(100);Eisenbergiella(100);
Otu0129	5255	Bacteria(100);Bacteroidetes(100);Bacteroidia(100);Bacteroidales(100);Porphyromonadaceae(100);Porphyromonadaceae_unclassified(100);
Otu0130	5201	Bacteria(100);Firmicutes(100);Clostridia(100);Clostridiales(100);Ruminococcaceae(100);Clostridium_IV(100);
Otu0131	4707	Bacteria(100);Firmicutes(100);Clostridia(100);Clostridiales(100);Lachnospiraceae(100);Lachnospiraceae_unclassified(100);
Otu0132	4561	Bacteria(100);Firmicutes(100);Clostridia(100);Clostridiales(100);Lachnospiraceae(100);Lachnospiraceae_unclassified(100);
Otu0133	4549	Bacteria(100);Firmicutes(100);Clostridia(100);Clostridiales(100);Ruminococcaceae(100);Ruminococcaceae_unclassified(100);
Otu0134	4489	Bacteria(100);Firmicutes(100);Clostridia(100);Clostridiales(100);Lachnospiraceae(100);Lachnospiraceae_unclassified(100);
Otu0135	4411	Bacteria(100);Firmicutes(100);Clostridia(100);Clostridiales(100);Lachnospiraceae(100);Lachnospiraceae_unclassified(100);
Otu0136	4396	Bacteria(100);Firmicutes(100);Clostridia(100);Clostridiales(100);Lachnospiraceae(100);Lachnospiraceae_unclassified(100);
Otu0137	4381	Bacteria(100);Firmicutes(100);Clostridia(100);Clostridiales(100);Lachnospiraceae(100);Lachnospiraceae_unclassified(100);
Otu0138	4315	Bacteria(100);Firmicutes(100);Clostridia(100);Clostridiales(100);Lachnospiraceae(100);Acetatifactor(100);
Otu0139	4312	Bacteria(100);Firmicutes(100);Erysipelotrichia(100);Erysipelotrichales(100);Erysipelotrichaceae(100);Erysipelotrichaceae_unclassified(100);
Otu0140	4253	Bacteria(100);Firmicutes(100);Clostridia(100);Clostridiales(100);Clostridiaceae_1(100);Clostridium_sensu_stricto(100);
Otu0141	4245	Bacteria(100);Firmicutes(100);Clostridia(100);Clostridiales(100);Ruminococcaceae(100);Ruminococcaceae_unclassified(90);
Otu0142	4207	Bacteria(100);Firmicutes(100);Clostridia(100);Clostridiales(100);Lachnospiraceae(100);Clostridium_XlVa(98);
Otu0143	4174	Bacteria(100);Firmicutes(100);Clostridia(100);Clostridiales(100);Lachnospiraceae(100);Lachnospiraceae_unclassified(100);
Otu0144	4138	Bacteria(100);Bacteria_unclassified(100);Bacteria_unclassified(100);Bacteria_unclassified(100);Bacteria_unclassified(100);Bacteria_unclassified(100);
Otu0145	4122	Bacteria(100);Firmicutes(100);Clostridia(100);Clostridiales(100);Ruminococcaceae(100);Butyricicoccus(100);
Otu0146	4086	Bacteria(100);Bacteria_unclassified(100);Bacteria_unclassified(100);Bacteria_unclassified(100);Bacteria_unclassified(100);Bacteria_unclassified(100);
Otu0147	3994	Bacteria(100);Actinobacteria(100);Actinobacteria(100);Bifidobacteriales(100);Bifidobacteriaceae(100);Bifidobacterium(100);
Otu0148	3933	Bacteria(100);Firmicutes(100);Clostridia(100);Clostridiales(100);Lachnospiraceae(100);Lachnospiraceae_unclassified(100);
Otu0149	3899	Bacteria(100);Actinobacteria(100);Actinobacteria(100);Coriobacteriales(100);Coriobacteriaceae(100);Coriobacteriaceae_unclassified(100);
Otu0150	3712	Bacteria(100);Firmicutes(100);Clostridia(100);Clostridiales(100);Lachnospiraceae(100);Lachnospiraceae_unclassified(100);
Otu0151	3628	Bacteria(100);Firmicutes(100);Clostridia(100);Clostridiales(100);Ruminococcaceae(100);Ruminococcaceae_unclassified(100);
Otu0152	3603	Bacteria(100);Firmicutes(100);Clostridia(100);Clostridiales(100);Lachnospiraceae(100);Lachnospiraceae_unclassified(100);
Otu0153	3573	Bacteria(100);Firmicutes(100);Clostridia(100);Clostridiales(100);Lachnospiraceae(100);Lachnospiraceae_unclassified(100);
Otu0154	3529	Bacteria(100);Firmicutes(100);Clostridia(100);Clostridiales(100);Lachnospiraceae(100);Lachnospiraceae_unclassified(100);
Otu0155	3501	Bacteria(100);Firmicutes(100);Clostridia(100);Clostridiales(100);Ruminococcaceae(100);Ruminococcaceae_unclassified(100);
Otu0156	3420	Bacteria(100);Firmicutes(100);Firmicutes_unclassified(100);Firmicutes_unclassified(100);Firmicutes_unclassified(100);Firmicutes_unclassified(100);
Otu0157	3387	Bacteria(100);Firmicutes(100);Clostridia(100);Clostridiales(100);Lachnospiraceae(100);Lachnospiraceae_unclassified(100);
Otu0158	3366	Bacteria(100);Firmicutes(100);Clostridia(100);Clostridiales(100);Lachnospiraceae(100);Lachnospiraceae_unclassified(100);
Otu0159	3358	Bacteria(100);Firmicutes(100);Clostridia(99);Clostridiales(99);Clostridiales_unclassified(99);Clostridiales_unclassified(99);
Otu0160	3290	Bacteria(100);Firmicutes(100);Clostridia(100);Clostridiales(100);Ruminococcaceae(100);Ruminococcaceae_unclassified(100);
Otu0161	3279	Bacteria(100);Firmicutes(100);Firmicutes_unclassified(100);Firmicutes_unclassified(100);Firmicutes_unclassified(100);Firmicutes_unclassified(100);
Otu0162	3226	Bacteria(100);Firmicutes(100);Clostridia(100);Clostridiales(100);Ruminococcaceae(100);Clostridium_IV(100);
Otu0163	3179	Bacteria(100);Firmicutes(100);Clostridia(100);Clostridiales(100);Lachnospiraceae(100);Lachnospiraceae_unclassified(100);
Otu0164	3168	Bacteria(100);Firmicutes(100);Erysipelotrichia(100);Erysipelotrichales(100);Erysipelotrichaceae(100);Erysipelotrichaceae_unclassified(100);
Otu0165	3149	Bacteria(100);Firmicutes(100);Clostridia(100);Clostridiales(100);Lachnospiraceae(100);Lachnospiraceae_unclassified(100);
Otu0166	3141	Bacteria(100);Firmicutes(100);Clostridia(100);Clostridiales(100);Ruminococcaceae(100);Ruminococcaceae_unclassified(82);
Otu0167	3096	Bacteria(100);Firmicutes(100);Clostridia(100);Clostridiales(100);Peptostreptococcaceae(100);Peptostreptococcus(100);
Otu0168	3076	Bacteria(100);Firmicutes(100);Clostridia(100);Clostridiales(100);Lachnospiraceae(100);Lachnospiraceae_unclassified(100);
Otu0169	3052	Bacteria(100);Firmicutes(100);Clostridia(100);Clostridiales(100);Lachnospiraceae(100);Acetatifactor(100);
Otu0170	2964	Bacteria(100);Firmicutes(100);Clostridia(100);Clostridiales(100);Lachnospiraceae(100);Lachnospiraceae_unclassified(100);
Otu0171	2872	Bacteria(100);Firmicutes(100);Clostridia(100);Clostridiales(100);Lachnospiraceae(100);Acetatifactor(100);
Otu0172	2786	Bacteria(100);Firmicutes(100);Firmicutes_unclassified(100);Firmicutes_unclassified(100);Firmicutes_unclassified(100);Firmicutes_unclassified(100);
Otu0173	2738	Bacteria(100);Bacteria_unclassified(100);Bacteria_unclassified(100);Bacteria_unclassified(100);Bacteria_unclassified(100);Bacteria_unclassified(100);
Otu0174	2600	Bacteria(100);Firmicutes(100);Clostridia(100);Clostridiales(100);Ruminococcaceae(99);Ruminococcaceae_unclassified(99);
Otu0175	2563	Bacteria(100);Firmicutes(100);Clostridia(100);Clostridiales(100);Lachnospiraceae(100);Lachnospiraceae_unclassified(100);
Otu0176	2496	Bacteria(100);Firmicutes(100);Clostridia(100);Clostridiales(100);Lachnospiraceae(100);Lachnospiraceae_unclassified(100);
Otu0177	2455	Bacteria(100);Firmicutes(100);Clostridia(100);Clostridiales(100);Lachnospiraceae(100);Lachnospiraceae_unclassified(100);
Otu0178	2452	Bacteria(100);Actinobacteria(100);Actinobacteria(100);Coriobacteriales(100);Coriobacteriaceae(100);Coriobacteriaceae_unclassified(100);
Otu0179	2322	Bacteria(100);Bacteria_unclassified(100);Bacteria_unclassified(100);Bacteria_unclassified(100);Bacteria_unclassified(100);Bacteria_unclassified(100);
Otu0180	2278	Bacteria(100);Firmicutes(100);Clostridia(100);Clostridiales(100);Lachnospiraceae(100);Lachnospiraceae_unclassified(100);
Otu0181	2228	Bacteria(100);Firmicutes(100);Clostridia(100);Clostridiales(100);Ruminococcaceae(100);Ruminococcaceae_unclassified(100);
Otu0182	2219	Bacteria(100);Firmicutes(100);Clostridia(100);Clostridiales(100);Ruminococcaceae(100);Ruminococcaceae_unclassified(100);
Otu0183	2214	Bacteria(100);Firmicutes(100);Clostridia(100);Clostridiales(100);Lachnospiraceae(93);Lachnospiraceae_unclassified(93);
Otu0184	2179	Bacteria(100);Bacteria_unclassified(99);Bacteria_unclassified(99);Bacteria_unclassified(99);Bacteria_unclassified(99);Bacteria_unclassified(99);
Otu0185	2152	Bacteria(100);Firmicutes(100);Clostridia(100);Clostridiales(100);Ruminococcaceae(100);Ruminococcaceae_unclassified(100);
Otu0186	2054	Bacteria(100);Bacteria_unclassified(100);Bacteria_unclassified(100);Bacteria_unclassified(100);Bacteria_unclassified(100);Bacteria_unclassified(100);
Otu0187	2036	Bacteria(100);Bacteria_unclassified(100);Bacteria_unclassified(100);Bacteria_unclassified(100);Bacteria_unclassified(100);Bacteria_unclassified(100);
Otu0188	2027	Bacteria(100);Bacteroidetes(100);Bacteroidia(100);Bacteroidales(100);Porphyromonadaceae(100);Porphyromonadaceae_unclassified(100);
Otu0189	2026	Bacteria(100);Firmicutes(100);Clostridia(100);Clostridiales(100);Ruminococcaceae(100);Oscillibacter(100);
Otu0190	1995	Bacteria(100);Firmicutes(100);Clostridia(100);Clostridiales(100);Lachnospiraceae(100);Lachnospiraceae_unclassified(97);
Otu0191	1932	Bacteria(100);Firmicutes(100);Clostridia(100);Clostridiales(100);Lachnospiraceae(100);Lachnospiraceae_unclassified(100);
Otu0192	1922	Bacteria(100);Firmicutes(100);Clostridia(100);Clostridiales(100);Ruminococcaceae(100);Ruminococcaceae_unclassified(100);
Otu0193	1912	Bacteria(100);Bacteroidetes(100);Bacteroidia(100);Bacteroidales(100);Porphyromonadaceae(100);Porphyromonadaceae_unclassified(100);
Otu0194	1863	Bacteria(100);Firmicutes(100);Clostridia(100);Clostridiales(100);Lachnospiraceae(100);Lachnospiraceae_unclassified(99);
Otu0195	1807	Bacteria(100);Bacteria_unclassified(100);Bacteria_unclassified(100);Bacteria_unclassified(100);Bacteria_unclassified(100);Bacteria_unclassified(100);
Otu0196	1770	Bacteria(100);Firmicutes(100);Clostridia(100);Clostridiales(100);Lachnospiraceae(100);Lachnospiraceae_unclassified(100);
Otu0197	1768	Bacteria(100);Firmicutes(100);Clostridia(100);Clostridiales(100);Clostridiaceae_1(100);Clostridium_sensu_stricto(100);
Otu0198	1750	Bacteria(100);Firmicutes(100);Clostridia(100);Clostridiales(100);Ruminococcaceae(98);Ruminococcaceae_unclassified(98);
Otu0199	1709	Bacteria(100);Firmicutes(100);Clostridia(100);Clostridiales(100);Lachnospiraceae(100);Lachnospiraceae_unclassified(100);
Otu0200	1699	Bacteria(100);Actinobacteria(100);Actinobacteria(100);Actinomycetales(100);Corynebacteriaceae(100);Corynebacterium(100);
Otu0201	1686	Bacteria(100);Bacteroidetes(100);Bacteroidia(100);Bacteroidales(100);Porphyromonadaceae(100);Porphyromonadaceae_unclassified(100);
Otu0202	1681	Bacteria(100);Firmicutes(100);Clostridia(100);Clostridiales(100);Clostridiales_unclassified(100);Clostridiales_unclassified(100);
Otu0203	1677	Bacteria(100);Firmicutes(100);Clostridia(100);Clostridiales(100);Ruminococcaceae(100);Ruminococcaceae_unclassified(100);
Otu0204	1612	Bacteria(100);Bacteria_unclassified(100);Bacteria_unclassified(100);Bacteria_unclassified(100);Bacteria_unclassified(100);Bacteria_unclassified(100);
Otu0205	1592	Bacteria(100);Firmicutes(100);Clostridia(100);Clostridiales(100);Lachnospiraceae(100);Lachnospiraceae_unclassified(100);
Otu0206	1568	Bacteria(100);Firmicutes(100);Clostridia(100);Clostridiales(100);Ruminococcaceae(98);Ruminococcaceae_unclassified(98);
Otu0207	1527	Bacteria(100);Bacteroidetes(100);Bacteroidia(100);Bacteroidales(100);Porphyromonadaceae(100);Porphyromonadaceae_unclassified(100);
Otu0208	1517	Bacteria(100);Firmicutes(100);Clostridia(100);Clostridiales(100);Ruminococcaceae(100);Clostridium_IV(100);
Otu0209	1475	Bacteria(100);Firmicutes(100);Clostridia(100);Clostridiales(100);Lachnospiraceae(99);Lachnospiraceae_unclassified(99);
Otu0210	1470	Bacteria(100);Firmicutes(100);Clostridia(100);Clostridiales(100);Lachnospiraceae(100);Lachnospiraceae_unclassified(100);
Otu0211	1452	Bacteria(100);Firmicutes(100);Clostridia(100);Clostridiales(100);Lachnospiraceae(100);Lachnospiraceae_unclassified(100);
Otu0212	1371	Bacteria(100);Bacteria_unclassified(100);Bacteria_unclassified(100);Bacteria_unclassified(100);Bacteria_unclassified(100);Bacteria_unclassified(100);
Otu0213	1366	Bacteria(100);Firmicutes(100);Clostridia(100);Clostridiales(100);Ruminococcaceae(100);Ruminococcaceae_unclassified(100);
Otu0214	1339	Bacteria(100);Firmicutes(100);Clostridia(100);Clostridiales(100);Lachnospiraceae(100);Lachnospiraceae_unclassified(100);
Otu0215	1314	Bacteria(100);Firmicutes(100);Clostridia(100);Clostridiales(100);Clostridiaceae_1(100);Clostridium_sensu_stricto(100);
Otu0216	1295	Bacteria(100);Bacteroidetes(100);Bacteroidia(100);Bacteroidales(100);Porphyromonadaceae(100);Porphyromonadaceae_unclassified(100);
Otu0217	1288	Bacteria(100);Firmicutes(100);Clostridia(100);Clostridiales(100);Lachnospiraceae(100);Lachnospiraceae_unclassified(100);
Otu0218	1286	Bacteria(100);Firmicutes(100);Clostridia(100);Clostridiales(100);Lachnospiraceae(100);Lachnospiraceae_unclassified(100);
Otu0219	1275	Bacteria(100);Firmicutes(100);Clostridia(100);Clostridiales(100);Lachnospiraceae(100);Lachnospiraceae_unclassified(100);
Otu0220	1225	Bacteria(100);Bacteroidetes(100);Bacteroidia(100);Bacteroidales(100);Porphyromonadaceae(100);Porphyromonadaceae_unclassified(100);
Otu0221	1219	Bacteria(100);Firmicutes(100);Clostridia(100);Clostridiales(100);Lachnospiraceae(100);Lachnospiraceae_unclassified(100);
Otu0222	1218	Bacteria(100);Firmicutes(100);Bacilli(100);Bacillales(100);Bacillaceae_1(100);Bacillus(100);
Otu0223	1197	Bacteria(100);Bacteroidetes(100);Bacteroidia(100);Bacteroidales(100);Porphyromonadaceae(100);Porphyromonadaceae_unclassified(100);
Otu0224	1192	Bacteria(100);Firmicutes(100);Clostridia(100);Clostridiales(100);Clostridiales_Incertae_Sedis_XIII(98);Clostridiales_Incertae_Sedis_XIII_unclassified(98);
Otu0225	1182	Bacteria(100);Bacteroidetes(100);Bacteroidia(100);Bacteroidales(100);Bacteroidales_unclassified(100);Bacteroidales_unclassified(100);
Otu0226	1171	Bacteria(100);Bacteria_unclassified(99);Bacteria_unclassified(99);Bacteria_unclassified(99);Bacteria_unclassified(99);Bacteria_unclassified(99);
Otu0227	1158	Bacteria(100);Bacteroidetes(100);Bacteroidia(100);Bacteroidales(100);Porphyromonadaceae(100);Porphyromonadaceae_unclassified(100);
Otu0228	1124	Bacteria(100);Firmicutes(100);Clostridia(100);Clostridiales(100);Lachnospiraceae(100);Lachnospiraceae_unclassified(100);
Otu0229	1124	Bacteria(100);Firmicutes(100);Clostridia(100);Clostridiales(100);Ruminococcaceae(100);Ruminococcaceae_unclassified(100);
Otu0230	1123	Bacteria(100);Bacteroidetes(100);Bacteroidia(100);Bacteroidales(100);Porphyromonadaceae(97);Porphyromonadaceae_unclassified(97);
Otu0231	1111	Bacteria(100);Firmicutes(100);Clostridia(100);Clostridiales(100);Lachnospiraceae(100);Lachnospiraceae_unclassified(100);
Otu0232	1103	Bacteria(100);Bacteria_unclassified(100);Bacteria_unclassified(100);Bacteria_unclassified(100);Bacteria_unclassified(100);Bacteria_unclassified(100);
Otu0233	1095	Bacteria(100);Firmicutes(100);Clostridia(99);Clostridiales(98);Clostridiales_unclassified(98);Clostridiales_unclassified(98);
Otu0234	1091	Bacteria(100);Firmicutes(100);Clostridia(100);Clostridiales(100);Ruminococcaceae(100);Ruminococcaceae_unclassified(100);
Otu0235	1090	Bacteria(100);Firmicutes(100);Clostridia(100);Clostridiales(100);Ruminococcaceae(100);Oscillibacter(99);
Otu0236	1075	Bacteria(100);Firmicutes(100);Clostridia(100);Clostridiales(100);Clostridiales_unclassified(100);Clostridiales_unclassified(100);
Otu0237	1050	Bacteria(100);Firmicutes(100);Clostridia(100);Clostridiales(100);Clostridiales_unclassified(100);Clostridiales_unclassified(100);
Otu0238	997	Bacteria(100);Firmicutes(100);Clostridia(100);Clostridiales(100);Lachnospiraceae(100);Lachnospiraceae_unclassified(100);
Otu0239	996	Bacteria(100);Firmicutes(100);Clostridia(100);Clostridiales(100);Lachnospiraceae(100);Lachnospiraceae_unclassified(100);
Otu0240	988	Bacteria(100);Firmicutes(100);Clostridia(100);Clostridiales(100);Ruminococcaceae(100);Oscillibacter(100);
Otu0241	984	Bacteria(100);Firmicutes(100);Bacilli(100);Bacillales(100);Bacillales_unclassified(94);Bacillales_unclassified(94);
Otu0242	974	Bacteria(100);Firmicutes(100);Bacilli(100);Lactobacillales(100);Streptococcaceae(100);Streptococcus(100);
Otu0243	945	Bacteria(100);Firmicutes(100);Clostridia(100);Clostridiales(100);Ruminococcaceae(100);Ruminococcaceae_unclassified(100);
Otu0244	943	Bacteria(100);Firmicutes(98);Firmicutes_unclassified(98);Firmicutes_unclassified(98);Firmicutes_unclassified(98);Firmicutes_unclassified(98);
Otu0245	911	Bacteria(100);Firmicutes(100);Clostridia(100);Clostridiales(100);Ruminococcaceae(100);Ruminococcaceae_unclassified(100);
Otu0246	889	Bacteria(100);Firmicutes(99);Firmicutes_unclassified(99);Firmicutes_unclassified(99);Firmicutes_unclassified(99);Firmicutes_unclassified(99);
Otu0247	862	Bacteria(100);Bacteria_unclassified(100);Bacteria_unclassified(100);Bacteria_unclassified(100);Bacteria_unclassified(100);Bacteria_unclassified(100);
Otu0248	848	Bacteria(100);Firmicutes(100);Clostridia(100);Clostridiales(100);Ruminococcaceae(98);Oscillibacter(97);
Otu0249	843	Bacteria(100);Firmicutes(100);Clostridia(98);Clostridia_unclassified(93);Clostridia_unclassified(93);Clostridia_unclassified(93);
Otu0250	841	Bacteria(100);Firmicutes(100);Clostridia(100);Clostridiales(100);Lachnospiraceae(100);Lachnospiraceae_unclassified(100);
Otu0251	786	Bacteria(100);Bacteria_unclassified(100);Bacteria_unclassified(100);Bacteria_unclassified(100);Bacteria_unclassified(100);Bacteria_unclassified(100);
Otu0252	781	Bacteria(100);Firmicutes(100);Bacilli(100);Lactobacillales(100);Lactobacillaceae(100);Lactobacillus(100);
Otu0253	757	Bacteria(100);Firmicutes(100);Negativicutes(100);Selenomonadales(100);Veillonellaceae(100);Megasphaera(100);
Otu0254	751	Bacteria(100);Firmicutes(100);Bacilli(100);Bacillales(100);Bacillales_unclassified(98);Bacillales_unclassified(98);
Otu0255	737	Bacteria(100);Firmicutes(100);Clostridia(100);Clostridiales(100);Ruminococcaceae(98);Ruminococcaceae_unclassified(98);
Otu0256	732	Bacteria(100);Firmicutes(100);Bacilli(100);Bacillales(100);Bacillales_unclassified(100);Bacillales_unclassified(100);
Otu0257	727	Bacteria(100);Firmicutes(100);Clostridia(100);Clostridiales(100);Ruminococcaceae(100);Ruminococcaceae_unclassified(100);
Otu0258	719	Bacteria(100);Bacteroidetes(100);Bacteroidia(100);Bacteroidales(100);Porphyromonadaceae(100);Porphyromonadaceae_unclassified(100);
Otu0259	712	Bacteria(100);Firmicutes(100);Clostridia(100);Clostridiales(100);Lachnospiraceae(100);Lachnospiraceae_unclassified(100);
Otu0260	703	Bacteria(100);Firmicutes(100);Bacilli(100);Lactobacillales(100);Lactobacillaceae(100);Pediococcus(100);
Otu0261	675	Bacteria(100);Firmicutes(100);Clostridia(100);Clostridiales(100);Lachnospiraceae(96);Lachnospiraceae_unclassified(96);
Otu0262	669	Bacteria(100);Firmicutes(100);Clostridia(100);Clostridiales(100);Lachnospiraceae(100);Lachnospiraceae_unclassified(100);
Otu0263	667	Bacteria(100);Firmicutes(100);Clostridia(100);Clostridiales(100);Ruminococcaceae(100);Ruminococcaceae_unclassified(100);
Otu0264	665	Bacteria(100);Firmicutes(100);Clostridia(100);Clostridiales(100);Lachnospiraceae(100);Lachnospiraceae_unclassified(100);
Otu0265	665	Bacteria(100);Firmicutes(100);Clostridia(100);Clostridiales(100);Lachnospiraceae(100);Lachnospiraceae_unclassified(100);
Otu0266	657	Bacteria(100);Firmicutes(100);Clostridia(100);Clostridiales(100);Ruminococcaceae(100);Ruminococcaceae_unclassified(100);
Otu0267	657	Bacteria(100);Firmicutes(100);Bacilli(100);Lactobacillales(100);Enterococcaceae(100);Vagococcus(68);
Otu0268	652	Bacteria(100);Firmicutes(99);Firmicutes_unclassified(97);Firmicutes_unclassified(97);Firmicutes_unclassified(97);Firmicutes_unclassified(97);
Otu0269	646	Bacteria(100);Firmicutes(100);Bacilli(100);Bacillales(100);Bacillaceae_1(100);Geobacillus(100);
Otu0270	602	Bacteria(100);Firmicutes(100);Clostridia(100);Clostridiales(100);Lachnospiraceae(100);Lachnospiraceae_unclassified(99);
Otu0271	596	Bacteria(100);Verrucomicrobia(100);Verrucomicrobiae(100);Verrucomicrobiales(100);Verrucomicrobiaceae(100);Akkermansia(100);
Otu0272	583	Bacteria(100);Firmicutes(100);Bacilli(100);Lactobacillales(100);Lactobacillaceae(100);Lactobacillus(100);
Otu0273	573	Bacteria(100);Firmicutes(100);Clostridia(100);Clostridiales(100);Peptostreptococcaceae(100);Clostridium_XI(89);
Otu0274	561	Bacteria(100);Firmicutes(96);Firmicutes_unclassified(96);Firmicutes_unclassified(96);Firmicutes_unclassified(96);Firmicutes_unclassified(96);
Otu0275	553	Bacteria(100);Proteobacteria(100);Alphaproteobacteria(100);Rhizobiales(100);Rhizobiaceae(100);Neorhizobium(96);
Otu0276	544	Bacteria(100);Firmicutes(100);Clostridia(100);Clostridiales(100);Lachnospiraceae(100);Lachnospiraceae_unclassified(100);
Otu0277	535	Bacteria(100);Bacteroidetes(100);Bacteroidia(100);Bacteroidales(100);Porphyromonadaceae(100);Porphyromonadaceae_unclassified(100);
Otu0278	522	Bacteria(100);Firmicutes(100);Clostridia(100);Clostridiales(100);Ruminococcaceae(100);Ruminococcaceae_unclassified(100);
Otu0279	500	Bacteria(100);Firmicutes(100);Clostridia(100);Clostridiales(100);Clostridiaceae_1(100);Clostridium_sensu_stricto(97);
Otu0280	499	Bacteria(100);Bacteroidetes(100);Bacteroidia(100);Bacteroidales(100);Bacteroidales_unclassified(100);Bacteroidales_unclassified(100);
Otu0281	480	Bacteria(100);Firmicutes(100);Clostridia(100);Clostridiales(100);Lachnospiraceae(100);Acetatifactor(100);
Otu0282	473	Bacteria(100);Firmicutes(100);Clostridia(87);Clostridiales(87);Clostridiales_unclassified(87);Clostridiales_unclassified(87);
Otu0283	467	Bacteria(100);Firmicutes(100);Bacilli(100);Bacillales(100);Planococcaceae(90);Bhargavaea(51);
Otu0284	465	Bacteria(100);Firmicutes(100);Clostridia(100);Clostridiales(100);Lachnospiraceae(99);Lachnospiraceae_unclassified(99);
Otu0285	465	Bacteria(100);Actinobacteria(100);Actinobacteria(100);Actinomycetales(100);Streptomycetaceae(100);Streptomyces(100);
Otu0286	464	Bacteria(100);Bacteria_unclassified(100);Bacteria_unclassified(100);Bacteria_unclassified(100);Bacteria_unclassified(100);Bacteria_unclassified(100);
Otu0287	463	Bacteria(100);Bacteroidetes(100);Bacteroidia(100);Bacteroidales(100);Porphyromonadaceae(97);Porphyromonadaceae_unclassified(97);
Otu0288	451	Bacteria(100);Bacteroidetes(96);Bacteroidia(59);Bacteroidales(59);Bacteroidales_unclassified(59);Bacteroidales_unclassified(59);
Otu0289	450	Bacteria(100);Firmicutes(100);Bacilli(100);Bacillales(100);Paenibacillaceae_1(100);Paenibacillus(89);
Otu0290	445	Bacteria(100);Bacteroidetes(100);Bacteroidia(100);Bacteroidales(100);Porphyromonadaceae(99);Porphyromonadaceae_unclassified(99);
Otu0291	441	Bacteria(100);Chloroflexi(100);Chloroflexi_unclassified(100);Chloroflexi_unclassified(100);Chloroflexi_unclassified(100);Chloroflexi_unclassified(100);
Otu0292	441	Bacteria(100);Firmicutes(100);Clostridia(100);Clostridiales(100);Clostridiales_unclassified(100);Clostridiales_unclassified(100);
Otu0293	439	Bacteria(100);Firmicutes(100);Firmicutes_unclassified(100);Firmicutes_unclassified(100);Firmicutes_unclassified(100);Firmicutes_unclassified(100);
Otu0294	436	Bacteria(100);Firmicutes(100);Clostridia(100);Clostridiales(100);Lachnospiraceae(100);Lachnospiraceae_unclassified(100);
Otu0295	431	Bacteria(100);Firmicutes(100);Clostridia(100);Clostridiales(100);Lachnospiraceae(100);Lachnospiraceae_unclassified(100);
Otu0296	426	Bacteria(100);Firmicutes(100);Clostridia(100);Clostridiales(100);Ruminococcaceae(100);Ruminococcaceae_unclassified(100);
Otu0297	422	Bacteria(100);Firmicutes(100);Clostridia(100);Clostridiales(100);Ruminococcaceae(100);Ruminococcaceae_unclassified(100);
Otu0298	421	Bacteria(100);Firmicutes(100);Clostridia(100);Clostridiales(100);Lachnospiraceae(100);Clostridium_XlVb(100);
Otu0299	411	Bacteria(100);Actinobacteria(100);Actinobacteria(100);Actinomycetales(100);Microbacteriaceae(100);Microbacteriaceae_unclassified(100);
Otu0300	411	Bacteria(100);Firmicutes(100);Clostridia(100);Clostridiales(100);Clostridiales_Incertae_Sedis_XI(100);Anaerococcus(100);
Otu0301	399	Bacteria(100);Firmicutes(100);Clostridia(100);Clostridiales(100);Lachnospiraceae(100);Blautia(98);
Otu0302	399	Bacteria(100);Firmicutes(100);Clostridia(100);Clostridiales(100);Lachnospiraceae(99);Lachnospiraceae_unclassified(99);
Otu0303	395	Bacteria(100);Firmicutes(100);Clostridia(100);Clostridiales(100);Ruminococcaceae(100);Ruminococcaceae_unclassified(66);
Otu0304	394	Bacteria(100);Firmicutes(100);Clostridia(100);Clostridiales(100);Lachnospiraceae(100);Dorea(96);
Otu0305	390	Bacteria(100);Firmicutes(100);Clostridia(100);Clostridiales(100);Ruminococcaceae(100);Ruminococcaceae_unclassified(100);
Otu0306	361	Bacteria(100);Bacteroidetes(100);Bacteroidia(100);Bacteroidales(100);Porphyromonadaceae(100);Porphyromonadaceae_unclassified(100);
Otu0307	361	Bacteria(100);Firmicutes(100);Clostridia(100);Clostridiales(100);Lachnospiraceae(100);Acetatifactor(98);
Otu0308	347	Bacteria(100);Firmicutes(100);Bacilli(100);Lactobacillales(100);Lactobacillales_unclassified(100);Lactobacillales_unclassified(100);
Otu0309	332	Bacteria(100);Firmicutes(100);Clostridia(100);Clostridiales(100);Lachnospiraceae(100);Lachnospiraceae_unclassified(100);
Otu0310	330	Bacteria(100);Bacteria_unclassified(100);Bacteria_unclassified(100);Bacteria_unclassified(100);Bacteria_unclassified(100);Bacteria_unclassified(100);
Otu0311	324	Bacteria(100);Firmicutes(100);Bacilli(100);Bacillales(100);Bacillaceae_1(100);Bacillus(100);
Otu0312	318	Bacteria(100);Firmicutes(100);Clostridia(100);Clostridiales(100);Ruminococcaceae(100);Ruminococcaceae_unclassified(99);
Otu0313	317	Bacteria(100);Firmicutes(100);Clostridia(100);Clostridiales(100);Lachnospiraceae(100);Clostridium_XlVb(100);
Otu0314	313	Bacteria(100);Bacteroidetes(100);Bacteroidia(100);Bacteroidales(100);Porphyromonadaceae(100);Porphyromonadaceae_unclassified(100);
Otu0315	308	Bacteria(100);Firmicutes(100);Erysipelotrichia(100);Erysipelotrichales(100);Erysipelotrichaceae(100);Turicibacter(100);
Otu0316	301	Bacteria(100);Firmicutes(100);Clostridia(100);Clostridiales(100);Lachnospiraceae(100);Lachnospiraceae_unclassified(83);
Otu0317	296	Bacteria(100);Firmicutes(100);Clostridia(100);Clostridiales(100);Ruminococcaceae(95);Ruminococcaceae_unclassified(95);
Otu0318	295	Bacteria(100);Firmicutes(100);Bacilli(100);Bacillales(100);Staphylococcaceae(100);Staphylococcaceae_unclassified(94);
Otu0319	293	Bacteria(100);Firmicutes(100);Clostridia(95);Clostridiales(95);Clostridiales_unclassified(95);Clostridiales_unclassified(95);
Otu0320	292	Bacteria(100);Bacteroidetes(100);Bacteroidia(100);Bacteroidales(100);Porphyromonadaceae(95);Porphyromonadaceae_unclassified(95);
Otu0321	290	Bacteria(100);Firmicutes(100);Clostridia(97);Clostridiales(96);Clostridiales_unclassified(96);Clostridiales_unclassified(96);
Otu0322	275	Bacteria(100);Firmicutes(100);Firmicutes_unclassified(100);Firmicutes_unclassified(100);Firmicutes_unclassified(100);Firmicutes_unclassified(100);
Otu0323	274	Bacteria(100);Bacteria_unclassified(100);Bacteria_unclassified(100);Bacteria_unclassified(100);Bacteria_unclassified(100);Bacteria_unclassified(100);
Otu0324	270	Bacteria(100);Firmicutes(100);Bacilli(100);Bacillales(98);Bacillales_unclassified(98);Bacillales_unclassified(98);
Otu0325	268	Bacteria(100);Firmicutes(100);Clostridia(100);Clostridiales(100);Ruminococcaceae(100);Ruminococcaceae_unclassified(100);
Otu0326	264	Bacteria(100);Firmicutes(100);Clostridia(100);Clostridiales(100);Lachnospiraceae(100);Lachnospiraceae_unclassified(100);
Otu0327	262	Bacteria(100);Actinobacteria(98);Actinobacteria_unclassified(96);Actinobacteria_unclassified(96);Actinobacteria_unclassified(96);Actinobacteria_unclassified(96);
Otu0328	262	Bacteria(100);Bacteroidetes(100);Bacteroidia(100);Bacteroidales(100);Porphyromonadaceae(100);Porphyromonadaceae_unclassified(100);
Otu0329	262	Bacteria(100);Firmicutes(100);Clostridia(100);Clostridiales(100);Lachnospiraceae(100);Lachnospiraceae_unclassified(95);
Otu0330	255	Bacteria(100);Firmicutes(100);Clostridia(100);Clostridiales(100);Clostridiales_unclassified(100);Clostridiales_unclassified(100);
Otu0331	254	Bacteria(100);Firmicutes(100);Clostridia(100);Clostridiales(100);Lachnospiraceae(100);Lachnospiraceae_unclassified(100);
Otu0332	250	Bacteria(100);Bacteria_unclassified(100);Bacteria_unclassified(100);Bacteria_unclassified(100);Bacteria_unclassified(100);Bacteria_unclassified(100);
Otu0333	245	Bacteria(100);Firmicutes(100);Bacilli(100);Lactobacillales(100);Streptococcaceae(100);Lactococcus(100);
Otu0334	242	Bacteria(100);Firmicutes(100);Clostridia(100);Clostridiales(100);Clostridiales_Incertae_Sedis_XI(100);Clostridiales_Incertae_Sedis_XI_unclassified(96);
Otu0335	240	Bacteria(100);Firmicutes(100);Clostridia(100);Clostridiales(100);Lachnospiraceae(100);Lachnospiraceae_unclassified(61);
Otu0336	240	Bacteria(100);Actinobacteria(100);Actinobacteria(100);Actinomycetales(100);Microbacteriaceae(100);Microbacteriaceae_unclassified(100);
Otu0337	239	Bacteria(100);Bacteroidetes(100);Bacteroidia(100);Bacteroidales(100);Porphyromonadaceae(99);Porphyromonadaceae_unclassified(99);
Otu0338	232	Bacteria(100);Firmicutes(100);Bacilli(100);Lactobacillales(100);Aerococcaceae(100);Aerococcus(100);
Otu0339	231	Bacteria(100);Firmicutes(100);Bacilli(100);Lactobacillales(100);Streptococcaceae(100);Streptococcus(100);
Otu0340	230	Bacteria(100);Bacteroidetes(100);Bacteroidia(100);Bacteroidales(100);Porphyromonadaceae(100);Porphyromonadaceae_unclassified(100);
Otu0341	230	Bacteria(100);Actinobacteria(100);Actinobacteria(100);Actinomycetales(100);Corynebacteriaceae(100);Corynebacterium(100);
Otu0342	224	Bacteria(100);Firmicutes(100);Bacilli(100);Lactobacillales(100);Lactobacillaceae(100);Lactobacillus(100);
Otu0343	223	Bacteria(100);Bacteroidetes(100);Bacteroidia(99);Bacteroidales(99);Porphyromonadaceae(98);Porphyromonadaceae_unclassified(98);
Otu0344	223	Bacteria(100);Firmicutes(100);Clostridia(100);Clostridiales(100);Ruminococcaceae(100);Ruminococcaceae_unclassified(100);
Otu0345	217	Bacteria(100);Bacteroidetes(100);Bacteroidia(100);Bacteroidales(100);Porphyromonadaceae(97);Porphyromonadaceae_unclassified(97);
Otu0346	214	Bacteria(100);Actinobacteria(100);Actinobacteria(100);Actinomycetales(100);Microbacteriaceae(100);Frondihabitans(92);
Otu0347	212	Bacteria(100);Firmicutes(100);Clostridia(100);Clostridiales(100);Lachnospiraceae(100);Lachnospiraceae_unclassified(100);
Otu0348	211	Bacteria(100);Bacteroidetes(100);Bacteroidia(100);Bacteroidales(100);Porphyromonadaceae(100);Porphyromonadaceae_unclassified(100);
Otu0349	208	Bacteria(100);Firmicutes(100);Clostridia(100);Clostridiales(100);Lachnospiraceae(100);Lachnospiraceae_unclassified(100);
Otu0350	204	Bacteria(100);Firmicutes(100);Clostridia(90);Clostridiales(89);Clostridiales_unclassified(89);Clostridiales_unclassified(89);
Otu0351	201	Bacteria(100);Firmicutes(100);Bacilli(100);Bacillales(100);Planococcaceae(100);Planococcaceae_unclassified(100);
Otu0352	201	Bacteria(100);Firmicutes(100);Clostridia(100);Clostridiales(100);Lachnospiraceae(100);Lachnospiraceae_unclassified(100);
Otu0353	198	Bacteria(100);Firmicutes(100);Clostridia(100);Clostridiales(100);Lachnospiraceae(100);Lachnospiraceae_unclassified(99);
Otu0354	195	Bacteria(100);Actinobacteria(76);Actinobacteria(76);Coriobacteriales(76);Coriobacteriaceae(76);Coriobacteriaceae_unclassified(76);
Otu0355	192	Bacteria(100);Actinobacteria(100);Actinobacteria(100);Coriobacteriales(100);Coriobacteriaceae(100);Asaccharobacter(93);
Otu0356	190	Bacteria(100);Bacteroidetes(100);Bacteroidia(100);Bacteroidales(100);Porphyromonadaceae(100);Porphyromonadaceae_unclassified(100);
Otu0357	190	Bacteria(100);Firmicutes(100);Clostridia(100);Clostridiales(100);Peptostreptococcaceae(100);Clostridium_XI(100);
Otu0358	188	Bacteria(100);Firmicutes(100);Clostridia(100);Clostridiales(100);Clostridiales_unclassified(97);Clostridiales_unclassified(97);
Otu0359	185	Bacteria(100);Firmicutes(100);Bacilli(100);Bacillales(100);Planococcaceae(100);Planococcaceae_unclassified(100);
Otu0360	182	Bacteria(100);Firmicutes(100);Clostridia(100);Clostridiales(100);Clostridiales_unclassified(100);Clostridiales_unclassified(100);
Otu0361	179	Bacteria(100);Firmicutes(100);Clostridia(100);Clostridiales(100);Clostridiaceae_1(100);Clostridium_sensu_stricto(100);
Otu0362	177	Bacteria(100);Firmicutes(100);Bacilli(100);Bacillales(100);Bacillaceae_1(82);Bacillaceae_1_unclassified(80);
Otu0363	177	Bacteria(100);Firmicutes(100);Clostridia(100);Clostridiales(100);Clostridiaceae_1(100);Clostridium_sensu_stricto(100);
Otu0364	172	Bacteria(100);Verrucomicrobia(100);Verrucomicrobiae(100);Verrucomicrobiales(100);Verrucomicrobiaceae(100);Akkermansia(100);
Otu0365	167	Bacteria(100);Firmicutes(100);Bacilli(100);Bacillales(100);Planococcaceae(87);Planococcaceae_unclassified(63);
Otu0366	165	Bacteria(100);Firmicutes(100);Bacilli(100);Bacillales(100);Staphylococcaceae(100);Jeotgalicoccus(100);
Otu0367	164	Bacteria(100);Bacteroidetes(100);Bacteroidia(100);Bacteroidales(100);Porphyromonadaceae(100);Porphyromonadaceae_unclassified(100);
Otu0368	163	Bacteria(100);Firmicutes(100);Erysipelotrichia(91);Erysipelotrichales(91);Erysipelotrichaceae(91);Turicibacter(91);
Otu0369	162	Bacteria(100);Bacteroidetes(100);Bacteroidia(100);Bacteroidales(100);Porphyromonadaceae(100);Porphyromonadaceae_unclassified(100);
Otu0370	161	Bacteria(100);Firmicutes(99);Clostridia(94);Clostridiales(94);Clostridiales_unclassified(94);Clostridiales_unclassified(94);
Otu0371	158	Bacteria(100);Firmicutes(100);Clostridia(100);Clostridiales(100);Peptoniphilaceae(100);Peptoniphilus(100);
Otu0372	158	Bacteria(100);Bacteroidetes(100);Bacteroidia(100);Bacteroidales(100);Porphyromonadaceae(100);Porphyromonadaceae_unclassified(100);
Otu0373	158	Bacteria(100);Bacteroidetes(100);Bacteroidia(94);Bacteroidales(94);Porphyromonadaceae(78);Porphyromonadaceae_unclassified(78);
Otu0374	157	Bacteria(100);Actinobacteria(100);Actinobacteria(100);Actinomycetales(100);Nocardioidaceae(100);Marmoricola(100);
Otu0375	157	Bacteria(100);Bacteroidetes(100);Bacteroidia(100);Bacteroidales(100);Porphyromonadaceae(100);Porphyromonadaceae_unclassified(100);
Otu0376	156	Bacteria(100);Firmicutes(100);Bacilli(100);Bacillales(100);Bacillales_unclassified(100);Bacillales_unclassified(100);
Otu0377	153	Bacteria(100);Proteobacteria(100);Gammaproteobacteria(100);Xanthomonadales(100);Xanthomonadaceae(100);Xanthomonas(100);
Otu0378	152	Bacteria(100);Firmicutes(100);Clostridia(100);Clostridiales(100);Clostridiaceae_1(100);Clostridium_sensu_stricto(100);
Otu0379	152	Bacteria(100);Bacteroidetes(100);Bacteroidia(100);Bacteroidales(100);Porphyromonadaceae(98);Porphyromonadaceae_unclassified(98);
Otu0380	150	Bacteria(100);Bacteroidetes(100);Bacteroidia(100);Bacteroidales(100);Porphyromonadaceae(100);Porphyromonadaceae_unclassified(100);
Otu0381	148	Bacteria(100);Firmicutes(100);Clostridia(100);Clostridiales(100);Ruminococcaceae(100);Ruminococcaceae_unclassified(67);
Otu0382	148	Bacteria(100);Proteobacteria(100);Alphaproteobacteria(100);Rhizobiales(100);Aurantimonadaceae(100);Aureimonas(100);
Otu0383	147	Bacteria(100);Firmicutes(100);Clostridia(100);Clostridiales(100);Lachnospiraceae(100);Lachnospiraceae_unclassified(100);
Otu0384	145	Bacteria(100);Bacteroidetes(100);Bacteroidia(100);Bacteroidales(100);Porphyromonadaceae(98);Porphyromonadaceae_unclassified(98);
Otu0385	141	Bacteria(100);Firmicutes(100);Bacilli(100);Bacillales(100);Paenibacillaceae_1(100);Paenibacillus(100);
Otu0386	141	Bacteria(100);Firmicutes(100);Bacilli(100);Bacillales(100);Bacillaceae_2(100);Bacillaceae_2_unclassified(88);
Otu0387	140	Bacteria(100);Firmicutes(100);Bacilli(100);Bacillales(100);Staphylococcaceae(100);Macrococcus(91);
Otu0388	140	Bacteria(100);Firmicutes(100);Bacilli(100);Bacillales(100);Bacillaceae_2(100);Bacillaceae_2_unclassified(93);
Otu0389	139	Bacteria(100);Firmicutes(100);Clostridia(100);Clostridiales(100);Ruminococcaceae(98);Oscillibacter(93);
Otu0390	139	Bacteria(100);Firmicutes(100);Clostridia(99);Clostridiales(99);Clostridiales_unclassified(99);Clostridiales_unclassified(99);
Otu0391	136	Bacteria(100);Firmicutes(100);Clostridia(95);Clostridiales(95);Clostridiales_unclassified(95);Clostridiales_unclassified(95);
Otu0392	135	Bacteria(100);Firmicutes(100);Clostridia(100);Clostridiales(100);Ruminococcaceae(100);Ruminococcaceae_unclassified(100);
Otu0393	135	Bacteria(100);Firmicutes(100);Clostridia(100);Clostridiales(100);Clostridiales_unclassified(100);Clostridiales_unclassified(100);
Otu0394	133	Bacteria(100);Firmicutes(100);Clostridia(100);Clostridiales(100);Lachnospiraceae(100);Lachnospiraceae_unclassified(100);
Otu0395	132	Bacteria(100);Firmicutes(100);Clostridia(100);Clostridiales(100);Lachnospiraceae(100);Lachnospiraceae_unclassified(100);
Otu0396	132	Bacteria(100);Firmicutes(100);Clostridia(100);Clostridiales(100);Lachnospiraceae(100);Lachnospiraceae_unclassified(100);
Otu0397	131	Bacteria(100);Firmicutes(100);Clostridia(100);Clostridiales(100);Ruminococcaceae(100);Ruminococcaceae_unclassified(100);
Otu0398	130	Bacteria(100);Bacteria_unclassified(80);Bacteria_unclassified(80);Bacteria_unclassified(80);Bacteria_unclassified(80);Bacteria_unclassified(80);
Otu0399	130	Bacteria(100);Proteobacteria(100);Deltaproteobacteria(100);Desulfovibrionales(100);Desulfovibrionaceae(100);Desulfovibrionaceae_unclassified(100);
Otu0400	130	Bacteria(100);Firmicutes(100);Erysipelotrichia(100);Erysipelotrichales(100);Erysipelotrichaceae(100);Turicibacter(100);
Otu0401	128	Bacteria(100);Actinobacteria(100);Actinobacteria(100);Actinomycetales(100);Nocardiaceae(100);Rhodococcus(100);
Otu0402	127	Bacteria(100);Actinobacteria(67);Actinobacteria_unclassified(67);Actinobacteria_unclassified(67);Actinobacteria_unclassified(67);Actinobacteria_unclassified(67);
Otu0403	127	Bacteria(100);Firmicutes(100);Clostridia(100);Clostridiales(100);Clostridiales_unclassified(100);Clostridiales_unclassified(100);
Otu0404	126	Bacteria(100);Bacteroidetes(100);Bacteroidia(95);Bacteroidales(95);Porphyromonadaceae(58);Porphyromonadaceae_unclassified(58);
Otu0405	124	Bacteria(100);Bacteroidetes(100);Bacteroidia(100);Bacteroidales(100);Porphyromonadaceae(100);Porphyromonadaceae_unclassified(100);
Otu0406	123	Bacteria(100);Firmicutes(100);Clostridia(100);Clostridiales(100);Clostridiaceae_1(100);Clostridium_sensu_stricto(100);
Otu0407	122	Bacteria(100);Firmicutes(100);Bacilli(100);Lactobacillales(100);Lactobacillaceae(100);Lactobacillus(100);
Otu0408	121	Bacteria(100);Bacteroidetes(100);Bacteroidia(100);Bacteroidales(100);Porphyromonadaceae(99);Porphyromonadaceae_unclassified(99);
Otu0409	121	Bacteria(100);Firmicutes(100);Clostridia(100);Clostridiales(100);Clostridiaceae_1(100);Hathewaya(100);
Otu0410	116	Bacteria(100);Firmicutes(100);Clostridia(100);Clostridiales(100);Lachnospiraceae(100);Lachnospiraceae_unclassified(100);
Otu0411	116	Bacteria(100);Firmicutes(100);Clostridia(100);Clostridiales(100);Clostridiales_unclassified(100);Clostridiales_unclassified(100);
Otu0412	112	Bacteria(100);Firmicutes(100);Clostridia(98);Clostridiales(98);Clostridiales_unclassified(98);Clostridiales_unclassified(98);
Otu0413	112	Bacteria(100);Firmicutes(100);Bacilli(100);Lactobacillales(100);Streptococcaceae(100);Streptococcus(100);
Otu0414	111	Bacteria(100);Bacteroidetes(100);Bacteroidia(100);Bacteroidales(100);Porphyromonadaceae(99);Porphyromonadaceae_unclassified(99);
Otu0415	109	Bacteria(100);Firmicutes(100);Clostridia(100);Clostridiales(100);Lachnospiraceae(100);Lachnospiraceae_unclassified(89);
Otu0416	108	Bacteria(100);Firmicutes(100);Bacilli(100);Lactobacillales(100);Lactobacillaceae(100);Lactobacillus(85);
Otu0417	108	Bacteria(100);Firmicutes(100);Clostridia(100);Clostridiales(100);Lachnospiraceae(100);Lachnospiraceae_unclassified(100);
Otu0418	107	Bacteria(100);Firmicutes(100);Clostridia(100);Clostridiales(100);Lachnospiraceae(100);Clostridium_XlVa(85);
Otu0419	107	Bacteria(100);Firmicutes(100);Clostridia(100);Clostridiales(100);Lachnospiraceae(100);Lachnospiraceae_unclassified(100);
Otu0420	106	Bacteria(100);Proteobacteria(100);Betaproteobacteria(100);Burkholderiales(100);Comamonadaceae(100);Pelomonas(79);
Otu0421	103	Bacteria(100);Firmicutes(100);Bacilli(100);Lactobacillales(100);Lactobacillaceae(89);Lactobacillus(89);
Otu0422	103	Bacteria(100);Firmicutes(100);Clostridia(100);Clostridiales(100);Ruminococcaceae(100);Ruminococcaceae_unclassified(95);
Otu0423	102	Bacteria(100);Bacteroidetes(100);Bacteroidia(100);Bacteroidales(100);Porphyromonadaceae(100);Porphyromonadaceae_unclassified(100);
Otu0424	101	Bacteria(100);Firmicutes(100);Bacilli(100);Bacillales(100);Bacillaceae_2(100);Bacillaceae_2_unclassified(100);
Otu0425	101	Bacteria(100);Bacteroidetes(100);Bacteroidia(100);Bacteroidales(100);Porphyromonadaceae(100);Porphyromonadaceae_unclassified(100);
Otu0426	97	Bacteria(100);Proteobacteria(100);Gammaproteobacteria(100);Enterobacteriales(100);Enterobacteriaceae(100);Enterobacteriaceae_unclassified(89);
Otu0427	97	Bacteria(100);Bacteria_unclassified(100);Bacteria_unclassified(100);Bacteria_unclassified(100);Bacteria_unclassified(100);Bacteria_unclassified(100);
Otu0428	97	Bacteria(100);Bacteroidetes(100);Bacteroidia(100);Bacteroidales(100);Porphyromonadaceae(95);Porphyromonadaceae_unclassified(95);
Otu0429	93	Bacteria(100);Firmicutes(100);Bacilli(100);Bacillales(99);Bacillales_unclassified(99);Bacillales_unclassified(99);
Otu0430	92	Bacteria(100);Firmicutes(100);Clostridia(100);Clostridiales(100);Clostridiales_unclassified(100);Clostridiales_unclassified(100);
Otu0431	92	Bacteria(100);Firmicutes(100);Bacilli(100);Lactobacillales(100);Enterococcaceae(98);Enterococcus(98);
Otu0432	92	Bacteria(100);Firmicutes(100);Clostridia(100);Clostridiales(100);Lachnospiraceae(98);Lachnospiraceae_unclassified(98);
Otu0433	91	Bacteria(100);Firmicutes(100);Clostridia(100);Clostridiales(100);Lachnospiraceae(100);Lachnospiraceae_unclassified(92);
Otu0434	90	Bacteria(100);Bacteroidetes(100);Bacteroidia(100);Bacteroidales(100);Porphyromonadaceae(98);Porphyromonadaceae_unclassified(98);
Otu0435	90	Bacteria(100);Firmicutes(100);Clostridia(100);Clostridiales(100);Lachnospiraceae(100);Lachnospiraceae_unclassified(100);
Otu0436	88	Bacteria(100);Firmicutes(100);Clostridia(100);Clostridiales(100);Ruminococcaceae(97);Ruminococcaceae_unclassified(97);
Otu0437	88	Bacteria(100);Proteobacteria(100);Alphaproteobacteria(100);Rhizobiales(100);Phyllobacteriaceae(100);Phyllobacteriaceae_unclassified(66);
Otu0438	88	Bacteria(100);Firmicutes(100);Bacilli(100);Lactobacillales(100);Lactobacillaceae(100);Lactobacillus(96);
Otu0439	85	Bacteria(100);Firmicutes(100);Clostridia(100);Clostridiales(100);Peptostreptococcaceae(100);Romboutsia(100);
Otu0440	85	Bacteria(100);Bacteria_unclassified(100);Bacteria_unclassified(100);Bacteria_unclassified(100);Bacteria_unclassified(100);Bacteria_unclassified(100);
Otu0441	83	Bacteria(100);Firmicutes(100);Clostridia(100);Clostridiales(100);Lachnospiraceae(100);Lachnospiraceae_unclassified(100);
Otu0442	83	Bacteria(100);Firmicutes(86);Firmicutes_unclassified(86);Firmicutes_unclassified(86);Firmicutes_unclassified(86);Firmicutes_unclassified(86);
Otu0443	82	Bacteria(100);Firmicutes(100);Bacilli(100);Bacillales(100);Thermoactinomycetaceae_1(100);Laceyella(100);
Otu0444	82	Bacteria(100);Proteobacteria(100);Betaproteobacteria(100);Burkholderiales(100);Burkholderiales_incertae_sedis(100);Tepidimonas(100);
Otu0445	81	Bacteria(100);Proteobacteria(100);Alphaproteobacteria(100);Rhizobiales(100);Methylobacteriaceae(100);Methylobacterium(100);
Otu0446	80	Bacteria(100);Bacteroidetes(100);Bacteroidia(100);Bacteroidales(100);Porphyromonadaceae(99);Porphyromonadaceae_unclassified(99);
Otu0447	80	Bacteria(100);Proteobacteria(100);Alphaproteobacteria(100);Rhizobiales(100);Brucellaceae(99);Ochrobactrum(93);
Otu0448	80	Bacteria(100);Firmicutes(100);Clostridia(100);Clostridiales(100);Clostridiaceae_1(100);Clostridium_sensu_stricto(100);
Otu0449	79	Bacteria(100);Firmicutes(100);Clostridia(100);Clostridiales(100);Lachnospiraceae(100);Lachnospiraceae_unclassified(100);
Otu0450	78	Bacteria(100);Bacteroidetes(100);Bacteroidia(100);Bacteroidales(100);Porphyromonadaceae(98);Porphyromonadaceae_unclassified(98);
Otu0451	77	Bacteria(100);Proteobacteria(100);Gammaproteobacteria(100);Enterobacteriales(100);Enterobacteriaceae(100);Escherichia/Shigella(88);
Otu0452	77	Bacteria(100);Firmicutes(100);Clostridia(100);Clostridiales(100);Clostridiales_Incertae_Sedis_XI(100);Anaerosalibacter(100);
Otu0453	76	Bacteria(100);Bacteroidetes(100);Bacteroidia(100);Bacteroidales(100);Porphyromonadaceae(100);Porphyromonadaceae_unclassified(100);
Otu0454	76	Bacteria(100);Firmicutes(100);Bacilli(100);Bacillales(100);Bacillaceae_2(100);Oceanobacillus(98);
Otu0455	76	Bacteria(100);Actinobacteria(100);Actinobacteria(100);Actinomycetales(100);Brevibacteriaceae(100);Brevibacterium(100);
Otu0456	74	Bacteria(100);Proteobacteria(100);Alphaproteobacteria(100);Rhizobiales(100);Aurantimonadaceae(94);Aureimonas(83);
Otu0457	74	Bacteria(100);Firmicutes(100);Clostridia(100);Clostridiales(100);Clostridiaceae_1(100);Clostridium_sensu_stricto(98);
Otu0458	74	Bacteria(100);Actinobacteria(100);Actinobacteria(100);Coriobacteriales(100);Coriobacteriaceae(100);Olsenella(100);
Otu0459	70	Bacteria(100);Firmicutes(100);Clostridia(100);Clostridiales(100);Ruminococcaceae(100);Ruminococcaceae_unclassified(100);
Otu0460	69	Bacteria(100);Firmicutes(100);Clostridia(100);Clostridiales(100);Ruminococcaceae(99);Oscillibacter(98);
Otu0461	69	Bacteria(100);Firmicutes(99);Clostridia(95);Clostridiales(93);Clostridiales_unclassified(93);Clostridiales_unclassified(93);
Otu0462	68	Bacteria(100);Firmicutes(74);Clostridia(65);Clostridiales(65);Clostridiales_unclassified(65);Clostridiales_unclassified(65);
Otu0463	68	Bacteria(100);Bacteroidetes(100);Bacteroidia(100);Bacteroidales(100);Porphyromonadaceae(100);Porphyromonadaceae_unclassified(100);
Otu0464	66	Bacteria(100);Bacteroidetes(100);Bacteroidia(100);Bacteroidales(100);Porphyromonadaceae(100);Porphyromonadaceae_unclassified(100);
Otu0465	65	Bacteria(100);Firmicutes(100);Clostridia(100);Clostridiales(100);Lachnospiraceae(100);Lachnospiraceae_unclassified(100);
Otu0466	65	Bacteria(100);Firmicutes(100);Clostridia(100);Clostridiales(100);Ruminococcaceae(99);Ruminococcaceae_unclassified(99);
Otu0467	64	Bacteria(100);Firmicutes(100);Clostridia(100);Clostridiales(100);Lachnospiraceae(100);Lachnospiraceae_unclassified(100);
Otu0468	64	Bacteria(100);Firmicutes(100);Clostridia(100);Clostridiales(100);Peptoniphilaceae(100);Peptoniphilus(90);
Otu0469	64	Bacteria(100);Firmicutes(100);Clostridia(100);Clostridiales(100);Ruminococcaceae(100);Pseudoflavonifractor(54);
Otu0470	63	Bacteria(100);Bacteroidetes(100);Bacteroidia(100);Bacteroidales(100);Bacteroidaceae(100);Bacteroides(100);
Otu0471	63	Bacteria(100);Firmicutes(100);Bacilli(100);Bacillales(100);Bacillaceae_2(100);Virgibacillus(100);
Otu0472	62	Bacteria(100);Firmicutes(100);Bacilli(100);Bacillales(100);Bacillaceae_1(100);Bacillaceae_1_unclassified(100);
Otu0473	62	Bacteria(100);Bacteroidetes(100);Bacteroidia(100);Bacteroidales(100);Porphyromonadaceae(100);Porphyromonadaceae_unclassified(100);
Otu0474	62	Bacteria(100);Firmicutes(100);Bacilli(100);Lactobacillales(100);Streptococcaceae(100);Streptococcus(100);
Otu0475	61	Bacteria(100);Firmicutes(100);Clostridia(100);Clostridiales(100);Lachnospiraceae(100);Acetatifactor(100);
Otu0476	61	Bacteria(100);Firmicutes(100);Clostridia(100);Clostridiales(100);Lachnospiraceae(97);Lachnospiraceae_unclassified(97);
Otu0477	60	Bacteria(100);Bacteroidetes(100);Bacteroidia(100);Bacteroidales(100);Porphyromonadaceae(100);Porphyromonadaceae_unclassified(100);
Otu0478	60	Bacteria(100);Firmicutes(100);Bacilli(100);Bacillales(100);Bacillaceae_1(99);Bacillaceae_1_unclassified(85);
Otu0479	60	Bacteria(100);Bacteria_unclassified(100);Bacteria_unclassified(100);Bacteria_unclassified(100);Bacteria_unclassified(100);Bacteria_unclassified(100);
Otu0480	60	Bacteria(100);Firmicutes(100);Clostridia(100);Clostridiales(100);Clostridiales_Incertae_Sedis_XI(100);Anaerococcus(100);
Otu0481	59	Bacteria(100);Firmicutes(100);Clostridia(100);Clostridiales(100);Lachnospiraceae(100);Lachnospiraceae_unclassified(95);
Otu0482	59	Bacteria(100);Firmicutes(100);Clostridia(100);Clostridiales(100);Lachnospiraceae(100);Lachnospiraceae_unclassified(100);
Otu0483	59	Bacteria(100);Bacteroidetes(100);Bacteroidia(100);Bacteroidales(100);Porphyromonadaceae(100);Porphyromonadaceae_unclassified(100);
Otu0484	59	Bacteria(100);Firmicutes(100);Clostridia(100);Clostridiales(100);Lachnospiraceae(100);Lachnospiraceae_unclassified(90);
Otu0485	59	Bacteria(100);Actinobacteria(100);Actinobacteria(100);Actinomycetales(100);Dermabacteraceae(100);Brachybacterium(100);
Otu0486	58	Bacteria(100);Firmicutes(100);Clostridia(100);Clostridiales(100);Ruminococcaceae(100);Ruminococcaceae_unclassified(88);
Otu0487	58	Bacteria(100);Firmicutes(100);Clostridia(100);Clostridiales(100);Lachnospiraceae(99);Lachnospiraceae_unclassified(99);
Otu0488	57	Bacteria(100);Firmicutes(97);Clostridia(86);Clostridiales(86);Clostridiales_unclassified(86);Clostridiales_unclassified(86);
Otu0489	56	Bacteria(100);Bacteroidetes(100);Bacteroidia(100);Bacteroidales(100);Porphyromonadaceae(93);Porphyromonadaceae_unclassified(93);
Otu0490	56	Bacteria(100);Bacteroidetes(100);Bacteroidia(100);Bacteroidales(100);Porphyromonadaceae(100);Porphyromonadaceae_unclassified(100);
Otu0491	56	Bacteria(100);Firmicutes(100);Clostridia(100);Clostridiales(100);Peptostreptococcaceae(100);Peptostreptococcaceae_unclassified(65);
Otu0492	55	Bacteria(100);Firmicutes(100);Firmicutes_unclassified(97);Firmicutes_unclassified(97);Firmicutes_unclassified(97);Firmicutes_unclassified(97);
Otu0493	54	Bacteria(100);Proteobacteria(100);Alphaproteobacteria(100);Rhizobiales(100);Hyphomicrobiaceae(100);Devosia(100);
Otu0494	54	Bacteria(100);Proteobacteria(100);Gammaproteobacteria(100);Pseudomonadales(100);Pseudomonadaceae(100);Pseudomonas(100);
Otu0495	54	Bacteria(100);Firmicutes(100);Clostridia(100);Clostridiales(100);Lachnospiraceae(95);Lachnospiraceae_unclassified(95);
Otu0496	53	Bacteria(100);Firmicutes(100);Bacilli(100);Lactobacillales(100);Lactobacillaceae(100);Lactobacillus(100);
Otu0497	53	Bacteria(100);Firmicutes(100);Bacilli(100);Lactobacillales(100);Lactobacillales_unclassified(76);Lactobacillales_unclassified(76);
Otu0498	52	Bacteria(100);Bacteria_unclassified(100);Bacteria_unclassified(100);Bacteria_unclassified(100);Bacteria_unclassified(100);Bacteria_unclassified(100);
Otu0499	52	Bacteria(100);Bacteroidetes(100);Bacteroidetes_unclassified(100);Bacteroidetes_unclassified(100);Bacteroidetes_unclassified(100);Bacteroidetes_unclassified(100);
Otu0500	52	Bacteria(100);Bacteroidetes(100);Bacteroidia(100);Bacteroidales(100);Porphyromonadaceae(97);Porphyromonadaceae_unclassified(97);
Otu0501	51	Bacteria(100);Actinobacteria(100);Actinobacteria(100);Actinomycetales(100);Corynebacteriaceae(100);Corynebacterium(100);
Otu0502	51	Bacteria(100);Actinobacteria(100);Actinobacteria(100);Actinomycetales(100);Sanguibacteraceae(100);Sanguibacter(100);
Otu0503	51	Bacteria(100);Bacteroidetes(100);Bacteroidia(100);Bacteroidales(100);Porphyromonadaceae(93);Porphyromonadaceae_unclassified(93);
Otu0504	51	Bacteria(100);Firmicutes(100);Bacilli(100);Lactobacillales(100);Streptococcaceae(100);Streptococcus(100);
Otu0505	51	Bacteria(100);Firmicutes(100);Bacilli(100);Bacillales(100);Paenibacillaceae_1(100);Paenibacillaceae_1_unclassified(100);
Otu0506	50	Bacteria(100);Firmicutes(100);Clostridia(100);Clostridiales(100);Lachnospiraceae(100);Lachnospiraceae_unclassified(100);
Otu0507	50	Bacteria(100);Bacteroidetes(100);Bacteroidia(100);Bacteroidales(100);Porphyromonadaceae(86);Porphyromonadaceae_unclassified(86);
Otu0508	49	Bacteria(100);Firmicutes(100);Bacilli(100);Lactobacillales(100);Enterococcaceae(74);Vagococcus(74);
Otu0509	49	Bacteria(100);Bacteroidetes(100);Bacteroidia(100);Bacteroidales(100);Porphyromonadaceae(100);Porphyromonadaceae_unclassified(100);
Otu0510	49	Bacteria(100);Firmicutes(86);Clostridia(86);Clostridiales(78);Clostridiales_unclassified(66);Clostridiales_unclassified(66);
Otu0511	48	Bacteria(100);Firmicutes(100);Bacilli(100);Lactobacillales(100);Lactobacillaceae(100);Lactobacillus(100);
Otu0512	48	Bacteria(100);Firmicutes(100);Clostridia(100);Clostridiales(100);Clostridiales_unclassified(80);Clostridiales_unclassified(80);
Otu0513	48	Bacteria(100);Bacteroidetes(100);Bacteroidia(92);Bacteroidales(92);Porphyromonadaceae(67);Porphyromonadaceae_unclassified(67);
Otu0514	48	Bacteria(100);Bacteroidetes(100);Bacteroidia(100);Bacteroidales(100);Porphyromonadaceae(88);Porphyromonadaceae_unclassified(88);
Otu0515	48	Bacteria(100);Actinobacteria(100);Actinobacteria(100);Actinomycetales(100);Pseudonocardiaceae(100);Pseudonocardiaceae_unclassified(100);
Otu0516	47	Bacteria(100);Proteobacteria(100);Gammaproteobacteria(100);Pseudomonadales(100);Moraxellaceae(100);Enhydrobacter(100);
Otu0517	47	Bacteria(100);Firmicutes(100);Clostridia(100);Clostridiales(100);Clostridiaceae_1(100);Clostridium_sensu_stricto(100);
Otu0518	46	Bacteria(100);Firmicutes(100);Clostridia(100);Clostridiales(100);Lachnospiraceae(100);Lachnospiraceae_unclassified(100);
Otu0519	46	Bacteria(100);Actinobacteria(100);Actinobacteria(100);Actinomycetales(100);Geodermatophilaceae(100);Geodermatophilaceae_unclassified(100);
Otu0520	46	Bacteria(100);Firmicutes(100);Clostridia(100);Clostridiales(100);Clostridiales_unclassified(100);Clostridiales_unclassified(100);
Otu0521	45	Bacteria(100);Firmicutes(100);Clostridia(100);Clostridiales(100);Clostridiales_Incertae_Sedis_XI(100);Tissierella(100);
Otu0522	45	Bacteria(100);Firmicutes(100);Clostridia(94);Clostridiales(94);Clostridiales_unclassified(94);Clostridiales_unclassified(94);
Otu0523	45	Bacteria(100);Firmicutes(100);Clostridia(92);Clostridiales(92);Clostridiales_unclassified(92);Clostridiales_unclassified(92);
Otu0524	45	Bacteria(100);Bacteroidetes(100);Bacteroidia(100);Bacteroidales(100);Porphyromonadaceae(96);Porphyromonadaceae_unclassified(96);
Otu0525	45	Bacteria(100);Firmicutes(100);Clostridia(100);Clostridiales(100);Ruminococcaceae(100);Pseudoflavonifractor(92);
Otu0526	44	Bacteria(100);Firmicutes(100);Clostridia(100);Clostridiales(100);Lachnospiraceae(100);Lachnospiraceae_unclassified(73);
Otu0527	44	Bacteria(100);Proteobacteria(100);Gammaproteobacteria(100);Pseudomonadales(100);Moraxellaceae(100);Acinetobacter(100);
Otu0528	44	Bacteria(100);Bacteroidetes(100);Bacteroidia(100);Bacteroidales(100);Porphyromonadaceae(100);Porphyromonadaceae_unclassified(100);
Otu0529	44	Bacteria(100);Actinobacteria(100);Actinobacteria(100);Actinomycetales(100);Micrococcaceae(100);Arthrobacter(85);
Otu0530	44	Bacteria(100);Firmicutes(100);Clostridia(100);Clostridiales(100);Lachnospiraceae(100);Clostridium_XlVa(98);
Otu0531	44	Bacteria(100);Proteobacteria(100);Alphaproteobacteria(100);Rhodobacterales(100);Rhodobacteraceae(100);Rhodobacteraceae_unclassified(100);
Otu0532	44	Bacteria(100);Firmicutes(100);Clostridia(100);Clostridiales(100);Lachnospiraceae(100);Lachnospiraceae_unclassified(100);
Otu0533	44	Bacteria(100);Firmicutes(100);Clostridia(100);Clostridiales(100);Clostridiales_unclassified(80);Clostridiales_unclassified(80);
Otu0534	44	Bacteria(100);Firmicutes(100);Clostridia(100);Clostridiales(100);Lachnospiraceae(98);Lachnospiraceae_unclassified(96);
Otu0535	43	Bacteria(100);Firmicutes(100);Bacilli(100);Bacillales(100);Bacillaceae_2(100);Cerasibacillus(100);
Otu0536	43	Bacteria(100);Actinobacteria(100);Actinobacteria(100);Actinomycetales(100);Mycobacteriaceae(100);Mycobacterium(100);
Otu0537	42	Bacteria(100);Firmicutes(100);Bacilli(100);Bacillales(100);Staphylococcaceae(96);Staphylococcaceae_unclassified(93);
Otu0538	42	Bacteria(100);Firmicutes(100);Clostridia(100);Clostridiales(100);Ruminococcaceae(100);Ruminococcus(96);
Otu0539	42	Bacteria(100);Firmicutes(100);Clostridia(100);Clostridiales(100);Ruminococcaceae(84);Ruminococcaceae_unclassified(84);
Otu0540	42	Bacteria(100);Bacteroidetes(86);Bacteroidia(77);Bacteroidales(77);Porphyromonadaceae(67);Porphyromonadaceae_unclassified(67);
Otu0541	42	Bacteria(100);Firmicutes(98);Clostridia(96);Clostridiales(74);Clostridiales_unclassified(74);Clostridiales_unclassified(74);
Otu0542	42	Bacteria(100);Actinobacteria(100);Actinobacteria(100);Actinomycetales(100);Kineosporiaceae(100);Kineococcus(58);
Otu0543	42	Bacteria(100);Bacteroidetes(100);Bacteroidia(100);Bacteroidales(100);Porphyromonadaceae(100);Porphyromonadaceae_unclassified(100);
Otu0544	41	Bacteria(100);Firmicutes(100);Clostridia(100);Clostridiales(100);Lachnospiraceae(100);Lachnospiraceae_unclassified(93);
Otu0545	41	Bacteria(100);Bacteroidetes(100);Bacteroidia(100);Bacteroidales(100);Bacteroidaceae(100);Bacteroides(100);
Otu0546	41	Bacteria(100);Firmicutes(100);Clostridia(100);Clostridiales(100);Ruminococcaceae(100);Ruminococcus(96);
Otu0547	40	Bacteria(100);Firmicutes(100);Clostridia(100);Clostridiales(93);Clostridiales_unclassified(93);Clostridiales_unclassified(93);
Otu0548	40	Bacteria(100);Actinobacteria(100);Actinobacteria(100);Actinomycetales(100);Pseudonocardiaceae(100);Pseudonocardia(88);
Otu0549	39	Bacteria(100);Bacteroidetes(100);Bacteroidia(100);Bacteroidales(100);Porphyromonadaceae(100);Porphyromonadaceae_unclassified(100);
Otu0550	39	Bacteria(100);Firmicutes(100);Erysipelotrichia(85);Erysipelotrichales(85);Erysipelotrichaceae(85);Turicibacter(85);
Otu0551	38	Bacteria(100);Bacteroidetes(100);Bacteroidia(100);Bacteroidales(100);Porphyromonadaceae(100);Porphyromonadaceae_unclassified(100);
Otu0552	38	Bacteria(100);Firmicutes(100);Clostridia(100);Clostridiales(100);Clostridiales_unclassified(100);Clostridiales_unclassified(100);
Otu0553	38	Bacteria(100);Bacteroidetes(100);Bacteroidia(100);Bacteroidales(100);Porphyromonadaceae(100);Porphyromonadaceae_unclassified(100);
Otu0554	38	Bacteria(100);Bacteroidetes(100);Bacteroidia(100);Bacteroidales(100);Porphyromonadaceae(100);Porphyromonadaceae_unclassified(100);
Otu0555	38	Bacteria(100);Proteobacteria(100);Gammaproteobacteria(100);Pseudomonadales(100);Pseudomonadaceae(100);Pseudomonas(100);
Otu0556	38	Bacteria(100);Firmicutes(100);Clostridia(100);Clostridiales(100);Clostridiales_Incertae_Sedis_XI(100);Gallicola(100);
Otu0557	38	Bacteria(100);Bacteroidetes(100);Bacteroidia(100);Bacteroidales(100);Porphyromonadaceae(100);Porphyromonadaceae_unclassified(100);
Otu0558	37	Bacteria(100);Firmicutes(100);Bacilli(100);Bacillales(100);Planococcaceae(90);Sporosarcina(90);
Otu0559	37	Bacteria(100);Firmicutes(100);Bacilli(100);Bacillales(100);Bacillaceae_2(100);Oceanobacillus(100);
Otu0560	36	Bacteria(100);Bacteroidetes(100);Bacteroidia(100);Bacteroidales(100);Porphyromonadaceae(81);Porphyromonadaceae_unclassified(81);
Otu0561	36	Bacteria(100);Firmicutes(100);Clostridia(100);Clostridiales(100);Lachnospiraceae(100);Lachnospiraceae_unclassified(100);
Otu0562	36	Bacteria(100);Firmicutes(100);Clostridia(100);Clostridiales(100);Peptostreptococcaceae(100);Peptostreptococcaceae_unclassified(89);
Otu0563	36	Bacteria(100);Firmicutes(100);Clostridia(100);Clostridiales(100);Lachnospiraceae(100);Lachnospiraceae_unclassified(78);
Otu0564	36	Bacteria(100);Proteobacteria(100);Gammaproteobacteria(100);Enterobacteriales(100);Enterobacteriaceae(100);Enterobacteriaceae_unclassified(100);
Otu0565	36	Bacteria(100);Firmicutes(100);Clostridia(100);Clostridiales(100);Lachnospiraceae(75);Lachnospiraceae_unclassified(75);
Otu0566	36	Bacteria(100);Firmicutes(100);Bacilli(100);Lactobacillales(100);Lactobacillaceae(100);Lactobacillus(100);
Otu0567	36	Bacteria(100);Firmicutes(100);Bacilli(100);Bacillales(100);Bacillaceae_2(100);Bacillaceae_2_unclassified(100);
Otu0568	35	Bacteria(100);Firmicutes(100);Bacilli(100);Lactobacillales(100);Lactobacillales_unclassified(100);Lactobacillales_unclassified(100);
Otu0569	35	Bacteria(100);Firmicutes(100);Clostridia(100);Clostridiales(100);Lachnospiraceae(100);Lachnospiraceae_unclassified(100);
Otu0570	35	Bacteria(100);Firmicutes(100);Clostridia(100);Clostridiales(100);Lachnospiraceae(98);Lachnospiraceae_unclassified(98);
Otu0571	35	Bacteria(100);Bacteroidetes(100);Bacteroidia(100);Bacteroidales(100);Porphyromonadaceae(100);Porphyromonadaceae_unclassified(100);
Otu0572	35	Bacteria(100);Actinobacteria(100);Actinobacteria(100);Actinomycetales(100);Pseudonocardiaceae(100);Saccharopolyspora(95);
Otu0573	34	Bacteria(100);Firmicutes(100);Clostridia(100);Clostridiales(100);Lachnospiraceae(95);Lachnospiraceae_unclassified(95);
Otu0574	34	Bacteria(100);Firmicutes(100);Clostridia(100);Clostridiales(100);Clostridiales_unclassified(95);Clostridiales_unclassified(95);
Otu0575	34	Bacteria(100);Firmicutes(100);Bacilli(100);Bacillales(100);Paenibacillaceae_1(100);Paenibacillus(100);
Otu0576	33	Bacteria(100);Firmicutes(100);Clostridia(100);Clostridiales(100);Lachnospiraceae(100);Lachnospiraceae_unclassified(100);
Otu0577	33	Bacteria(100);Firmicutes(100);Clostridia(100);Clostridiales(100);Lachnospiraceae(100);Lachnospiraceae_unclassified(100);
Otu0578	33	Bacteria(100);Bacteria_unclassified(100);Bacteria_unclassified(100);Bacteria_unclassified(100);Bacteria_unclassified(100);Bacteria_unclassified(100);
Otu0579	33	Bacteria(100);Firmicutes(100);Clostridia(100);Clostridiales(100);Clostridiales_unclassified(100);Clostridiales_unclassified(100);
Otu0580	33	Bacteria(100);Firmicutes(100);Clostridia(100);Clostridiales(100);Lachnospiraceae(100);Lachnospiraceae_unclassified(100);
Otu0581	33	Bacteria(100);Firmicutes(100);Clostridia(100);Clostridiales(100);Ruminococcaceae(100);Ruminococcaceae_unclassified(100);
Otu0582	32	Bacteria(100);Bacteroidetes(100);Bacteroidia(100);Bacteroidales(100);Porphyromonadaceae(100);Porphyromonadaceae_unclassified(100);
Otu0583	32	Bacteria(100);Firmicutes(100);Bacilli(100);Bacillales(100);Bacillaceae_1(100);Bacillus(91);
Otu0584	32	Bacteria(100);Proteobacteria(100);Gammaproteobacteria(100);Enterobacteriales(100);Enterobacteriaceae(100);Enterobacteriaceae_unclassified(100);
Otu0585	32	Bacteria(100);Bacteroidetes(100);Bacteroidia(100);Bacteroidales(100);Porphyromonadaceae(100);Porphyromonadaceae_unclassified(100);
Otu0586	32	Bacteria(100);Bacteroidetes(100);Bacteroidia(100);Bacteroidales(100);Porphyromonadaceae(100);Porphyromonadaceae_unclassified(100);
Otu0587	32	Bacteria(100);Firmicutes(100);Clostridia(100);Clostridiales(100);Ruminococcaceae(100);Ruminococcaceae_unclassified(100);
Otu0588	32	Bacteria(100);Firmicutes(100);Clostridia(100);Clostridiales(100);Peptococcaceae_1(100);Peptococcus(100);
Otu0589	32	Bacteria(100);Bacteroidetes(100);Bacteroidia(100);Bacteroidales(100);Porphyromonadaceae(100);Porphyromonadaceae_unclassified(100);
Otu0590	31	Bacteria(100);Bacteroidetes(100);Bacteroidia(100);Bacteroidales(100);Porphyromonadaceae(97);Porphyromonadaceae_unclassified(97);
Otu0591	31	Bacteria(100);Bacteroidetes(100);Bacteroidia(100);Bacteroidales(100);Porphyromonadaceae(91);Porphyromonadaceae_unclassified(91);
Otu0592	31	Bacteria(100);Firmicutes(88);Clostridia(84);Clostridiales(78);Clostridiales_unclassified(78);Clostridiales_unclassified(78);
Otu0593	31	Bacteria(100);Firmicutes(100);Clostridia(97);Clostridiales(97);Clostridiales_unclassified(97);Clostridiales_unclassified(97);
Otu0594	31	Bacteria(100);Firmicutes(100);Bacilli(100);Bacillales(100);Bacillales_unclassified(84);Bacillales_unclassified(84);
Otu0595	30	Bacteria(100);Bacteroidetes(100);Bacteroidia(100);Bacteroidales(100);Bacteroidales_unclassified(54);Bacteroidales_unclassified(54);
Otu0596	30	Bacteria(100);Firmicutes(100);Clostridia(100);Clostridiales(100);Clostridiales_Incertae_Sedis_XI(100);Tissierella(100);
Otu0597	30	Bacteria(100);Actinobacteria(100);Actinobacteria(100);Actinomycetales(100);Nocardiaceae(100);Rhodococcus(100);
Otu0598	30	Bacteria(100);Firmicutes(100);Clostridia(100);Clostridiales(100);Lachnospiraceae(100);Lachnospiraceae_unclassified(100);
Otu0599	30	Bacteria(100);Bacteroidetes(100);Bacteroidia(80);Bacteroidales(80);Bacteroidales_unclassified(61);Bacteroidales_unclassified(61);
Otu0600	30	Bacteria(100);Firmicutes(100);Clostridia(100);Clostridiales(100);Clostridiales_Incertae_Sedis_XI(100);Tepidimicrobium(100);
Otu0601	29	Bacteria(100);Firmicutes(100);Clostridia(100);Clostridiales(100);Ruminococcaceae(100);Pseudoflavonifractor(80);
Otu0602	29	Bacteria(100);Firmicutes(100);Bacilli(100);Bacillales(100);Bacillaceae_1(83);Bacillaceae_1_unclassified(83);
Otu0603	29	Bacteria(100);Firmicutes(100);Clostridia(100);Clostridiales(100);Lachnospiraceae(100);Clostridium_XlVa(90);
Otu0604	28	Bacteria(100);Firmicutes(100);Clostridia(100);Clostridiales(100);Lachnospiraceae(100);Acetatifactor(97);
Otu0605	28	Bacteria(100);Actinobacteria(100);Actinobacteria(100);Actinomycetales(100);Actinomycetales_unclassified(100);Actinomycetales_unclassified(100);
Otu0606	28	Bacteria(100);Firmicutes(100);Clostridia(90);Clostridiales(90);Clostridiales_unclassified(90);Clostridiales_unclassified(90);
Otu0607	28	Bacteria(100);Actinobacteria(100);Actinobacteria(100);Actinomycetales(100);Nocardioidaceae(100);Nocardioidaceae_unclassified(68);
Otu0608	28	Bacteria(100);Bacteroidetes(100);Bacteroidia(100);Bacteroidales(100);Porphyromonadaceae(100);Porphyromonadaceae_unclassified(100);
Otu0609	28	Bacteria(100);Firmicutes(100);Bacilli(100);Lactobacillales(100);Lactobacillaceae(100);Lactobacillus(100);
Otu0610	27	Bacteria(100);Firmicutes(100);Bacilli(100);Bacillales(100);Planococcaceae(100);Ureibacillus(100);
Otu0611	27	Bacteria(100);Firmicutes(100);Clostridia(100);Clostridiales(100);Lachnospiraceae(93);Lachnospiraceae_unclassified(93);
Otu0612	27	Bacteria(100);Bacteroidetes(100);Bacteroidia(100);Bacteroidales(100);Porphyromonadaceae(100);Porphyromonadaceae_unclassified(100);
Otu0613	27	Bacteria(100);Firmicutes(100);Clostridia(100);Clostridiales(100);Lachnospiraceae(97);Lachnospiraceae_unclassified(97);
Otu0614	27	Bacteria(100);Firmicutes(100);Clostridia(100);Clostridiales(100);Lachnospiraceae(89);Lachnospiraceae_unclassified(89);
Otu0615	27	Bacteria(100);Actinobacteria(100);Actinobacteria(100);Actinomycetales(100);Dietziaceae(93);Dietzia(93);
Otu0616	27	Bacteria(100);Firmicutes(100);Clostridia(100);Clostridiales(100);Lachnospiraceae(100);Lachnospiraceae_unclassified(100);
Otu0617	27	Bacteria(100);Actinobacteria(100);Actinobacteria(100);Actinomycetales(100);Actinomycetaceae(89);Actinomyces(89);
Otu0618	26	Bacteria(100);Firmicutes(100);Clostridia(100);Clostridiales(100);Lachnospiraceae(93);Lachnospiraceae_unclassified(93);
Otu0619	26	Bacteria(100);Firmicutes(100);Clostridia(100);Clostridiales(100);Lachnospiraceae(100);Lachnospiraceae_unclassified(100);
Otu0620	26	Bacteria(100);Bacteroidetes(100);Bacteroidia(100);Bacteroidales(100);Porphyromonadaceae(97);Porphyromonadaceae_unclassified(97);
Otu0621	26	Bacteria(100);Bacteria_unclassified(100);Bacteria_unclassified(100);Bacteria_unclassified(100);Bacteria_unclassified(100);Bacteria_unclassified(100);
Otu0622	25	Bacteria(100);Firmicutes(100);Clostridia(100);Clostridiales(100);Lachnospiraceae(100);Lachnospiraceae_unclassified(100);
Otu0623	25	Bacteria(100);Bacteria_unclassified(80);Bacteria_unclassified(80);Bacteria_unclassified(80);Bacteria_unclassified(80);Bacteria_unclassified(80);
Otu0624	25	Bacteria(100);Firmicutes(100);Negativicutes(100);Selenomonadales(100);Veillonellaceae(100);Veillonella(100);
Otu0625	25	Bacteria(100);Firmicutes(100);Clostridia(100);Clostridiales(100);Ruminococcaceae(92);Ruminococcaceae_unclassified(92);
Otu0626	25	Bacteria(100);Firmicutes(96);Clostridia(96);Clostridiales(96);Clostridiales_unclassified(96);Clostridiales_unclassified(96);
Otu0627	25	Bacteria(100);Firmicutes(100);Clostridia(100);Clostridiales(100);Lachnospiraceae(100);Lachnospiraceae_unclassified(100);
Otu0628	25	Bacteria(100);Firmicutes(100);Clostridia(100);Clostridiales(100);Lachnospiraceae(100);Lachnospiraceae_unclassified(100);
Otu0629	25	Bacteria(100);Actinobacteria(100);Actinobacteria(100);Actinomycetales(100);Micrococcaceae(100);Kocuria(76);
Otu0630	24	Bacteria(100);Bacteroidetes(100);Bacteroidia(100);Bacteroidales(100);Rikenellaceae(100);Alistipes(100);
Otu0631	24	Bacteria(100);Firmicutes(100);Clostridia(100);Clostridiales(100);Lachnospiraceae(100);Lachnospiraceae_unclassified(100);
Otu0632	24	Bacteria(100);Proteobacteria(100);Gammaproteobacteria(100);Xanthomonadales(100);Xanthomonadaceae(100);Stenotrophomonas(100);
Otu0633	24	Bacteria(100);Bacteroidetes(100);Bacteroidia(100);Bacteroidales(100);Porphyromonadaceae(100);Porphyromonadaceae_unclassified(100);
Otu0634	24	Bacteria(100);Actinobacteria(100);Actinobacteria_unclassified(100);Actinobacteria_unclassified(100);Actinobacteria_unclassified(100);Actinobacteria_unclassified(100);
Otu0635	23	Bacteria(100);Bacteroidetes(100);Bacteroidia(100);Bacteroidales(100);Porphyromonadaceae(100);Porphyromonadaceae_unclassified(100);
Otu0636	23	Bacteria(100);Firmicutes(100);Clostridia(100);Clostridiales(100);Lachnospiraceae(100);Lachnospiraceae_unclassified(61);
Otu0637	23	Bacteria(100);Firmicutes(100);Bacilli(100);Bacillales(100);Paenibacillaceae_1(100);Paenibacillus(87);
Otu0638	23	Bacteria(100);Firmicutes(100);Clostridia(100);Clostridiales(100);Clostridiales_unclassified(96);Clostridiales_unclassified(96);
Otu0639	23	Bacteria(100);Firmicutes(100);Clostridia(100);Clostridiales(100);Clostridiaceae_1(100);Clostridium_sensu_stricto(100);
Otu0640	23	Bacteria(100);Firmicutes(100);Clostridia(100);Clostridiales(100);Lachnospiraceae(100);Lachnospiraceae_unclassified(74);
Otu0641	23	Bacteria(100);Firmicutes(100);Clostridia(100);Clostridiales(100);Lachnospiraceae(57);Lachnospiraceae_unclassified(57);
Otu0642	23	Bacteria(100);Proteobacteria(100);Alphaproteobacteria(100);Rhizobiales(100);Rhizobiaceae(100);Rhizobium(61);
Otu0643	23	Bacteria(100);Bacteroidetes(100);Bacteroidia(92);Bacteroidales(92);Porphyromonadaceae(87);Porphyromonadaceae_unclassified(87);
Otu0644	23	Bacteria(100);Verrucomicrobia(100);Verrucomicrobiae(100);Verrucomicrobiales(100);Verrucomicrobiaceae(100);Akkermansia(100);
Otu0645	23	Bacteria(100);Firmicutes(100);Bacilli(100);Bacillales(100);Paenibacillaceae_1(100);Brevibacillus(100);
Otu0646	23	Bacteria(100);Proteobacteria(100);Alphaproteobacteria(100);Rhizobiales(100);Bradyrhizobiaceae(100);Bradyrhizobium(96);
Otu0647	23	Bacteria(100);Firmicutes(100);Clostridia(100);Clostridiales(100);Lachnospiraceae(100);Lachnospiraceae_unclassified(92);
Otu0648	22	Bacteria(100);Bacteroidetes(100);Bacteroidia(100);Bacteroidales(100);Porphyromonadaceae(100);Porphyromonadaceae_unclassified(100);
Otu0649	22	Bacteria(100);Firmicutes(100);Bacilli(100);Bacillales(100);Bacillaceae_2(100);Bacillaceae_2_unclassified(100);
Otu0650	22	Bacteria(100);Firmicutes(100);Clostridia(100);Clostridiales(100);Lachnospiraceae(100);Lachnospiraceae_unclassified(100);
Otu0651	22	Bacteria(100);Proteobacteria(100);Alphaproteobacteria(100);Rhodobacterales(100);Rhodobacteraceae(100);Rubellimicrobium(100);
Otu0652	22	Bacteria(100);Firmicutes(100);Clostridia(100);Clostridiales(100);Lachnospiraceae(96);Lachnospiraceae_unclassified(96);
Otu0653	22	Bacteria(100);Bacteroidetes(100);Bacteroidia(100);Bacteroidales(100);Porphyromonadaceae(100);Porphyromonadaceae_unclassified(100);
Otu0654	22	Bacteria(100);Actinobacteria(100);Actinobacteria(100);Actinomycetales(100);Nocardiopsaceae(100);Nocardiopsis(82);
Otu0655	22	Bacteria(100);Firmicutes(100);Clostridia(100);Clostridiales(100);Lachnospiraceae(100);Lachnospiraceae_unclassified(100);
Otu0656	22	Bacteria(100);Bacteroidetes(100);Bacteroidia(100);Bacteroidales(100);Porphyromonadaceae(100);Porphyromonadaceae_unclassified(100);
Otu0657	22	Bacteria(100);Proteobacteria(100);Betaproteobacteria(100);Neisseriales(100);Neisseriaceae(100);Neisseriaceae_unclassified(73);
Otu0658	22	Bacteria(100);Firmicutes(100);Clostridia(100);Clostridiales(100);Clostridiales_unclassified(100);Clostridiales_unclassified(100);
Otu0659	22	Bacteria(100);Firmicutes(100);Clostridia(100);Clostridiales(100);Lachnospiraceae(100);Lachnospiraceae_unclassified(96);
Otu0660	22	Bacteria(100);Proteobacteria(100);Alphaproteobacteria(100);Rhizobiales(100);Phyllobacteriaceae(100);Phyllobacterium(96);
Otu0661	22	Bacteria(100);Firmicutes(100);Bacilli(100);Bacillales(100);Bacillaceae_2(100);Bacillaceae_2_unclassified(100);
Otu0662	22	Bacteria(100);Proteobacteria(100);Betaproteobacteria(100);Burkholderiales(100);Burkholderiaceae(100);Burkholderia(100);
Otu0663	21	Bacteria(100);Bacteroidetes(100);Bacteroidia(100);Bacteroidales(100);Porphyromonadaceae(100);Porphyromonadaceae_unclassified(100);
Otu0664	21	Bacteria(100);Firmicutes(100);Clostridia(100);Clostridiales(100);Lachnospiraceae(100);Lachnospiraceae_unclassified(100);
Otu0665	21	Bacteria(100);Firmicutes(100);Clostridia(100);Clostridiales(100);Lachnospiraceae(100);Lachnospiraceae_unclassified(100);
Otu0666	21	Bacteria(100);Firmicutes(100);Bacilli(100);Lactobacillales(100);Lactobacillaceae(100);Lactobacillus(100);
Otu0667	21	Bacteria(100);Firmicutes(100);Clostridia(100);Clostridiales(100);Lachnospiraceae(100);Lachnospiraceae_unclassified(100);
Otu0668	21	Bacteria(100);Firmicutes(100);Bacilli(100);Lactobacillales(100);Leuconostocaceae(100);Leuconostoc(100);
Otu0669	21	Bacteria(100);Firmicutes(100);Clostridia(100);Clostridiales(100);Lachnospiraceae(96);Lachnospiraceae_unclassified(96);
Otu0670	21	Bacteria(100);Firmicutes(100);Clostridia(100);Clostridiales(100);Lachnospiraceae(100);Clostridium_XlVa(100);
Otu0671	21	Bacteria(100);Firmicutes(100);Clostridia(100);Clostridiales(100);Lachnospiraceae(100);Lachnospiraceae_unclassified(100);
Otu0672	21	Bacteria(100);Firmicutes(100);Clostridia(100);Clostridiales(100);Lachnospiraceae(100);Lachnospiraceae_unclassified(72);
Otu0673	21	Bacteria(100);Firmicutes(100);Bacilli(100);Bacillales(100);Bacillaceae_2(100);Bacillaceae_2_unclassified(100);
Otu0674	21	Bacteria(100);Firmicutes(100);Clostridia(100);Clostridiales(100);Lachnospiraceae(100);Lachnospiraceae_unclassified(100);
Otu0675	21	Bacteria(100);Firmicutes(100);Clostridia(100);Clostridiales(100);Lachnospiraceae(100);Lachnospiraceae_unclassified(100);
Otu0676	20	Bacteria(100);Bacteroidetes(100);Bacteroidia(100);Bacteroidales(100);Porphyromonadaceae(100);Porphyromonadaceae_unclassified(100);
Otu0677	20	Bacteria(100);Firmicutes(100);Clostridia(100);Clostridiales(100);Lachnospiraceae(100);Clostridium_XlVa(100);
Otu0678	20	Bacteria(100);Actinobacteria(100);Actinobacteria(100);Actinomycetales(100);Microbacteriaceae(100);Microbacteriaceae_unclassified(100);
Otu0679	20	Bacteria(100);Firmicutes(100);Clostridia(100);Clostridiales(100);Lachnospiraceae(100);Lachnospiraceae_unclassified(95);
Otu0680	20	Bacteria(100);Firmicutes(100);Clostridia(100);Clostridiales(100);Lachnospiraceae(80);Lachnospiraceae_unclassified(80);
Otu0681	20	Bacteria(100);Firmicutes(100);Clostridia(100);Clostridiales(100);Ruminococcaceae(65);Ruminococcaceae_unclassified(65);
Otu0682	20	Bacteria(100);Firmicutes(100);Bacilli(100);Bacillales(100);Planococcaceae(100);Lysinibacillus(100);
Otu0683	20	Bacteria(100);Firmicutes(100);Clostridia(100);Clostridiales(100);Lachnospiraceae(100);Lachnospiraceae_unclassified(100);
Otu0684	20	Bacteria(100);Firmicutes(100);Clostridia(100);Clostridiales(100);Lachnospiraceae(100);Lachnospiraceae_unclassified(100);
Otu0685	20	Bacteria(100);Firmicutes(100);Bacilli(100);Bacillales(100);Thermoactinomycetaceae_1(100);Thermoactinomyces(100);
Otu0686	20	Bacteria(100);Bacteroidetes(100);Bacteroidia(100);Bacteroidales(100);Porphyromonadaceae(100);Porphyromonadaceae_unclassified(100);
Otu0687	20	Bacteria(100);Bacteroidetes(100);Bacteroidia(100);Bacteroidales(100);Porphyromonadaceae(100);Porphyromonadaceae_unclassified(100);
Otu0688	20	Bacteria(100);Bacteroidetes(100);Bacteroidia(100);Bacteroidales(100);Porphyromonadaceae(100);Porphyromonadaceae_unclassified(100);
Otu0689	20	Bacteria(100);Firmicutes(100);Clostridia(100);Clostridiales(100);Lachnospiraceae(100);Lachnospiraceae_unclassified(100);
Otu0690	20	Bacteria(100);Firmicutes(100);Clostridia(80);Clostridiales(80);Clostridiales_unclassified(80);Clostridiales_unclassified(80);
Otu0691	20	Bacteria(100);Firmicutes(100);Clostridia(100);Clostridiales(100);Lachnospiraceae(100);Lachnospiraceae_unclassified(90);
Otu0692	20	Bacteria(100);Firmicutes(100);Clostridia(100);Clostridiales(100);Lachnospiraceae(100);Lachnospiraceae_unclassified(100);
Otu0693	19	Bacteria(100);Bacteroidetes(100);Bacteroidia(100);Bacteroidales(100);Porphyromonadaceae(100);Porphyromonadaceae_unclassified(100);
Otu0694	19	Bacteria(100);Bacteria_unclassified(100);Bacteria_unclassified(100);Bacteria_unclassified(100);Bacteria_unclassified(100);Bacteria_unclassified(100);
Otu0695	19	Bacteria(100);Firmicutes(100);Clostridia(100);Clostridiales(100);Clostridiales_unclassified(100);Clostridiales_unclassified(100);
Otu0696	19	Bacteria(100);Actinobacteria(100);Actinobacteria(100);Coriobacteriales(100);Coriobacteriaceae(100);Asaccharobacter(58);
Otu0697	19	Bacteria(100);Actinobacteria(100);Actinobacteria(100);Actinomycetales(100);Nocardiaceae(100);Gordonia(100);
Otu0698	19	Bacteria(100);Bacteroidetes(100);Bacteroidia(100);Bacteroidales(100);Porphyromonadaceae(100);Porphyromonadaceae_unclassified(100);
Otu0699	19	Bacteria(100);Firmicutes(100);Bacilli(100);Bacillales(100);Bacillaceae_2(100);Bacillaceae_2_unclassified(100);
Otu0700	19	Bacteria(100);Firmicutes(100);Bacilli(100);Lactobacillales(100);Lactobacillaceae(100);Lactobacillus(100);
Otu0701	19	Bacteria(100);Firmicutes(100);Bacilli(100);Bacillales(100);Paenibacillaceae_2(100);Aneurinibacillus(100);
Otu0702	19	Bacteria(100);Proteobacteria(100);Alphaproteobacteria(100);Rhizobiales(100);Phyllobacteriaceae(100);Chelativorans(100);
Otu0703	19	Bacteria(100);Firmicutes(100);Clostridia(100);Clostridiales(100);Lachnospiraceae(100);Lachnospiraceae_unclassified(100);
Otu0704	19	Bacteria(100);Firmicutes(100);Clostridia(100);Clostridiales(100);Lachnospiraceae(95);Lachnospiraceae_unclassified(95);
Otu0705	19	Bacteria(100);Firmicutes(100);Clostridia(100);Clostridiales(100);Clostridiales_Incertae_Sedis_XI(100);Clostridiales_Incertae_Sedis_XI_unclassified(100);
Otu0706	19	Bacteria(100);Firmicutes(100);Bacilli(100);Bacillales(100);Bacillaceae_2(100);Amphibacillus(100);
Otu0707	18	Bacteria(100);Deinococcus-Thermus(100);Deinococci(100);Thermales(100);Thermaceae(100);Thermus(100);
Otu0708	18	Bacteria(100);Firmicutes(100);Clostridia(100);Clostridiales(100);Peptostreptococcaceae(100);Sporacetigenium(100);
Otu0709	18	Bacteria(100);Firmicutes(100);Bacilli(100);Bacillales(100);Paenibacillaceae_1(100);Paenibacillus(100);
Otu0710	18	Bacteria(100);Firmicutes(100);Clostridia(84);Clostridiales(84);Clostridiales_unclassified(84);Clostridiales_unclassified(84);
Otu0711	18	Bacteria(100);Bacteroidetes(100);Bacteroidia(100);Bacteroidales(100);Rikenellaceae(100);Alistipes(100);
Otu0712	18	Bacteria(100);Firmicutes(100);Clostridia(100);Clostridiales(100);Lachnospiraceae(100);Lachnospiraceae_unclassified(100);
Otu0713	18	Bacteria(100);Firmicutes(100);Bacilli(100);Bacillales(100);Bacillaceae_2(100);Bacillaceae_2_unclassified(100);
Otu0714	18	Bacteria(100);Actinobacteria(100);Actinobacteria(100);Actinomycetales(100);Cellulomonadaceae(100);Cellulomonas(78);
Otu0715	18	Bacteria(100);Proteobacteria(100);Alphaproteobacteria(100);Rhizobiales(100);Hyphomicrobiaceae(100);Devosia(100);
Otu0716	18	Bacteria(100);Firmicutes(100);Clostridia(100);Clostridiales(100);Lachnospiraceae(100);Lachnospiraceae_unclassified(95);
Otu0717	18	Bacteria(100);Firmicutes(100);Clostridia(100);Clostridiales(100);Lachnospiraceae(100);Lachnospiraceae_unclassified(100);
Otu0718	17	Bacteria(100);Firmicutes(100);Clostridia(100);Clostridiales(100);Ruminococcaceae(100);Clostridium_III(100);
Otu0719	17	Bacteria(100);Firmicutes(100);Clostridia(100);Clostridiales(100);Lachnospiraceae(100);Lachnospiraceae_unclassified(100);
Otu0720	17	Bacteria(100);Firmicutes(100);Clostridia(100);Clostridiales(100);Lachnospiraceae(100);Dorea(71);
Otu0721	17	Bacteria(100);Firmicutes(100);Clostridia(53);Clostridiales(53);Clostridiales_unclassified(53);Clostridiales_unclassified(53);
Otu0722	17	Bacteria(100);Firmicutes(100);Clostridia(100);Clostridiales(100);Clostridiales_unclassified(100);Clostridiales_unclassified(100);
Otu0723	17	Bacteria(100);Proteobacteria(100);Gammaproteobacteria(100);Enterobacteriales(100);Enterobacteriaceae(100);Enterobacteriaceae_unclassified(100);
Otu0724	17	Bacteria(100);Bacteria_unclassified(89);Bacteria_unclassified(89);Bacteria_unclassified(89);Bacteria_unclassified(89);Bacteria_unclassified(89);
Otu0725	17	Bacteria(100);Firmicutes(100);Clostridia(100);Clostridiales(100);Lachnospiraceae(95);Lachnospiraceae_unclassified(95);
Otu0726	17	Bacteria(100);Firmicutes(100);Clostridia(100);Clostridiales(100);Lachnospiraceae(100);Lachnospiraceae_unclassified(100);
Otu0727	17	Bacteria(100);Firmicutes(100);Clostridia(100);Clostridiales(100);Lachnospiraceae(100);Lachnospiraceae_unclassified(100);
Otu0728	17	Bacteria(100);Firmicutes(100);Bacilli(100);Bacillales(100);Bacillales_unclassified(100);Bacillales_unclassified(100);
Otu0729	17	Bacteria(100);Actinobacteria(100);Actinobacteria(100);Coriobacteriales(100);Coriobacteriaceae(100);Olsenella(100);
Otu0730	17	Bacteria(100);Firmicutes(100);Bacilli(100);Bacillales(100);Bacillaceae_2(100);Bacillaceae_2_unclassified(100);
Otu0731	17	Bacteria(100);Firmicutes(100);Clostridia(100);Clostridiales(100);Lachnospiraceae(100);Lachnospiraceae_unclassified(59);
Otu0732	17	Bacteria(100);Firmicutes(100);Clostridia(83);Clostridiales(83);Clostridiales_unclassified(83);Clostridiales_unclassified(83);
Otu0733	17	Bacteria(100);Firmicutes(100);Clostridia(77);Clostridiales(77);Clostridiales_unclassified(77);Clostridiales_unclassified(77);
Otu0734	17	Bacteria(100);Actinobacteria(100);Actinobacteria(100);Actinomycetales(100);Micrococcaceae(100);Micrococcus(89);
Otu0735	17	Bacteria(100);Firmicutes(100);Clostridia(100);Clostridiales(100);Lachnospiraceae(100);Lachnospiraceae_unclassified(100);
Otu0736	17	Bacteria(100);Actinobacteria(100);Actinobacteria(100);Actinomycetales(100);Corynebacteriaceae(100);Corynebacterium(100);
Otu0737	17	Bacteria(100);Bacteroidetes(100);Bacteroidia(100);Bacteroidales(100);Porphyromonadaceae(100);Porphyromonadaceae_unclassified(100);
Otu0738	17	Bacteria(100);Firmicutes(100);Clostridia(100);Clostridiales(100);Lachnospiraceae(100);Lachnospiraceae_unclassified(77);
Otu0739	17	Bacteria(100);Firmicutes(100);Clostridia(100);Clostridiales(100);Lachnospiraceae(100);Lachnospiraceae_unclassified(100);
Otu0740	16	Bacteria(100);Firmicutes(100);Clostridia(100);Clostridiales(100);Lachnospiraceae(100);Lachnospiraceae_unclassified(100);
Otu0741	16	Bacteria(100);Bacteroidetes(100);Bacteroidia(94);Bacteroidales(94);Porphyromonadaceae(94);Porphyromonadaceae_unclassified(94);
Otu0742	16	Bacteria(100);Bacteroidetes(100);Bacteroidia(100);Bacteroidales(100);Porphyromonadaceae(82);Porphyromonadaceae_unclassified(82);
Otu0743	16	Bacteria(100);Firmicutes(100);Clostridia(100);Clostridiales(100);Clostridiales_unclassified(57);Clostridiales_unclassified(57);
Otu0744	16	Bacteria(100);Firmicutes(100);Clostridia(100);Clostridiales(100);Lachnospiraceae(100);Lachnospiraceae_unclassified(100);
Otu0745	16	Bacteria(100);Actinobacteria(100);Actinobacteria(100);Actinomycetales(100);Kineosporiaceae(100);Pseudokineococcus(100);
Otu0746	16	Bacteria(100);Bacteroidetes(100);Bacteroidia(100);Bacteroidales(100);Porphyromonadaceae(100);Porphyromonadaceae_unclassified(100);
Otu0747	16	Bacteria(100);Firmicutes(100);Clostridia(100);Clostridiales(100);Clostridiales_Incertae_Sedis_XI(100);Tepidimicrobium(100);
Otu0748	16	Bacteria(100);Bacteroidetes(100);Bacteroidia(88);Bacteroidales(88);Bacteroidales_unclassified(88);Bacteroidales_unclassified(88);
Otu0749	16	Bacteria(100);Actinobacteria(100);Actinobacteria(100);Actinomycetales(100);Microbacteriaceae(100);Leucobacter(88);
Otu0750	16	Bacteria(100);Bacteroidetes(100);Bacteroidia(100);Bacteroidales(100);Porphyromonadaceae(100);Porphyromonadaceae_unclassified(100);
Otu0751	16	Bacteria(100);Firmicutes(100);Bacilli(94);Lactobacillales(94);Lactobacillaceae(88);Lactobacillus(88);
Otu0752	16	Bacteria(100);Proteobacteria(100);Gammaproteobacteria(100);Enterobacteriales(100);Enterobacteriaceae(100);Enterobacteriaceae_unclassified(100);
Otu0753	16	Bacteria(100);Bacteroidetes(100);Bacteroidia(75);Bacteroidales(75);Porphyromonadaceae(63);Porphyromonadaceae_unclassified(63);
Otu0754	16	Bacteria(100);Firmicutes(100);Clostridia(100);Clostridiales(100);Lachnospiraceae(100);Lachnospiraceae_unclassified(100);
Otu0755	16	Bacteria(100);Firmicutes(100);Clostridia(100);Clostridiales(100);Lachnospiraceae(100);Lachnospiraceae_unclassified(88);
Otu0756	16	Bacteria(100);Bacteroidetes(100);Bacteroidia(100);Bacteroidales(100);Porphyromonadaceae(88);Porphyromonadaceae_unclassified(88);
Otu0757	16	Bacteria(100);Firmicutes(100);Bacilli(100);Lactobacillales(100);Streptococcaceae(100);Lactococcus(100);
Otu0758	16	Bacteria(100);Firmicutes(100);Clostridia(100);Clostridiales(100);Clostridiaceae_1(100);Clostridium_sensu_stricto(82);
Otu0759	16	Bacteria(100);Firmicutes(100);Clostridia(100);Clostridiales(100);Lachnospiraceae(100);Lachnospiraceae_unclassified(100);
Otu0760	16	Bacteria(100);Firmicutes(100);Clostridia(100);Clostridiales(100);Clostridiales_unclassified(100);Clostridiales_unclassified(100);
Otu0761	16	Bacteria(100);Firmicutes(100);Clostridia(100);Clostridiales(100);Lachnospiraceae(100);Lachnospiraceae_unclassified(100);
Otu0762	15	Bacteria(100);Bacteroidetes(100);Bacteroidia(100);Bacteroidales(100);Porphyromonadaceae(100);Porphyromonadaceae_unclassified(100);
Otu0763	15	Bacteria(100);Firmicutes(100);Clostridia(94);Clostridiales(94);Clostridiales_unclassified(94);Clostridiales_unclassified(94);
Otu0764	15	Bacteria(100);Firmicutes(74);Firmicutes_unclassified(61);Firmicutes_unclassified(61);Firmicutes_unclassified(61);Firmicutes_unclassified(61);
Otu0765	15	Bacteria(100);Firmicutes(100);Clostridia(100);Clostridiales(100);Lachnospiraceae(100);Lachnospiraceae_unclassified(100);
Otu0766	15	Bacteria(100);Actinobacteria(100);Actinobacteria(100);Actinomycetales(100);Nocardioidaceae(100);Nocardioides(100);
Otu0767	15	Bacteria(100);Bacteroidetes(100);Bacteroidia(100);Bacteroidales(100);Porphyromonadaceae(100);Porphyromonadaceae_unclassified(100);
Otu0768	15	Bacteria(100);Firmicutes(100);Clostridia(100);Clostridiales(100);Lachnospiraceae(87);Lachnospiraceae_unclassified(87);
Otu0769	15	Bacteria(100);Firmicutes(100);Clostridia(100);Clostridiales(100);Ruminococcaceae(100);Ruminococcaceae_unclassified(100);
Otu0770	15	Bacteria(100);Firmicutes(100);Clostridia(100);Clostridiales(100);Lachnospiraceae(100);Lachnospiraceae_unclassified(54);
Otu0771	15	Bacteria(100);Firmicutes(100);Clostridia(100);Clostridiales(100);Lachnospiraceae(100);Lachnospiraceae_unclassified(100);
Otu0772	15	Bacteria(100);Firmicutes(100);Clostridia(100);Clostridiales(100);Lachnospiraceae(100);Lachnospiraceae_unclassified(61);
Otu0773	15	Bacteria(100);Firmicutes(100);Clostridia(100);Clostridiales(100);Clostridiaceae_1(100);Clostridium_sensu_stricto(100);
Otu0774	15	Bacteria(100);Proteobacteria(100);Alphaproteobacteria(100);Rhodospirillales(100);Reyranella(100);Reyranella_unclassified(100);
Otu0775	15	Bacteria(100);Actinobacteria(100);Actinobacteria(100);Actinomycetales(100);Actinomycetales_unclassified(100);Actinomycetales_unclassified(100);
Otu0776	15	Bacteria(100);Bacteroidetes(100);Bacteroidia(100);Bacteroidales(100);Porphyromonadaceae(100);Porphyromonadaceae_unclassified(100);
Otu0777	15	Bacteria(100);Proteobacteria(100);Alphaproteobacteria(100);Sphingomonadales(100);Sphingomonadaceae(100);Sphingomonas(100);
Otu0778	15	Bacteria(100);Firmicutes(100);Clostridia(100);Clostridiales(100);Lachnospiraceae(100);Lachnospiraceae_unclassified(100);
Otu0779	15	Bacteria(100);Firmicutes(100);Clostridia(100);Clostridiales(100);Lachnospiraceae(100);Acetatifactor(100);
Otu0780	15	Bacteria(100);Firmicutes(100);Clostridia(100);Clostridiales(100);Lachnospiraceae(100);Lachnospiraceae_unclassified(100);
Otu0781	15	Bacteria(100);Bacteroidetes(100);Bacteroidia(94);Bacteroidales(94);Porphyromonadaceae(67);Porphyromonadaceae_unclassified(67);
Otu0782	15	Bacteria(100);Firmicutes(100);Clostridia(100);Clostridiales(100);Lachnospiraceae(100);Lachnospiraceae_unclassified(100);
Otu0783	15	Bacteria(100);Firmicutes(100);Bacilli(100);Bacillales(100);Bacillaceae_2(100);Bacillaceae_2_unclassified(100);
Otu0784	15	Bacteria(100);Firmicutes(100);Clostridia(100);Clostridiales(100);Ruminococcaceae(100);Ruminococcaceae_unclassified(100);
Otu0785	15	Bacteria(100);Firmicutes(100);Clostridia(100);Clostridiales(100);Clostridiaceae_1(100);Clostridium_sensu_stricto(100);
Otu0786	15	Bacteria(100);Actinobacteria(100);Actinobacteria(100);Actinomycetales(100);Micrococcaceae(100);Yaniella(100);
Otu0787	15	Bacteria(100);Proteobacteria(100);Gammaproteobacteria(100);Enterobacteriales(100);Enterobacteriaceae(100);Enterobacteriaceae_unclassified(100);
Otu0788	15	Bacteria(100);Bacteroidetes(100);Bacteroidia(100);Bacteroidales(100);Porphyromonadaceae(100);Porphyromonadaceae_unclassified(100);
Otu0789	15	Bacteria(100);Firmicutes(100);Clostridia(100);Clostridiales(100);Lachnospiraceae(100);Lachnospiraceae_unclassified(100);
Otu0790	15	Bacteria(100);Bacteroidetes(100);Bacteroidia(100);Bacteroidales(100);Porphyromonadaceae(94);Porphyromonadaceae_unclassified(94);
Otu0791	15	Bacteria(100);Bacteroidetes(100);Bacteroidia(100);Bacteroidales(100);Porphyromonadaceae(100);Porphyromonadaceae_unclassified(100);
Otu0792	15	Bacteria(100);Actinobacteria(100);Actinobacteria(100);Actinomycetales(100);Dermacoccaceae(80);Dermacoccus(80);
Otu0793	15	Bacteria(100);Firmicutes(100);Clostridia(100);Clostridiales(100);Lachnospiraceae(100);Acetatifactor(100);
Otu0794	14	Bacteria(100);Firmicutes(93);Erysipelotrichia(86);Erysipelotrichales(86);Erysipelotrichaceae(86);Erysipelotrichaceae_unclassified(86);
Otu0795	14	Bacteria(100);Bacteroidetes(100);Bacteroidia(100);Bacteroidales(100);Porphyromonadaceae(100);Porphyromonadaceae_unclassified(100);
Otu0796	14	Bacteria(100);Firmicutes(100);Clostridia(100);Clostridiales(100);Lachnospiraceae(100);Lachnospiraceae_unclassified(100);
Otu0797	14	Bacteria(100);Firmicutes(100);Clostridia(100);Clostridiales(100);Lachnospiraceae(100);Lachnospiraceae_unclassified(100);
Otu0798	14	Bacteria(100);Firmicutes(100);Clostridia(100);Clostridiales(100);Lachnospiraceae(100);Lachnospiraceae_unclassified(100);
Otu0799	14	Bacteria(100);Firmicutes(100);Clostridia(100);Clostridiales(100);Lachnospiraceae(100);Blautia(100);
Otu0800	14	Bacteria(100);Firmicutes(100);Clostridia(100);Clostridiales(100);Lachnospiraceae(100);Lachnospiraceae_unclassified(100);
Otu0801	14	Bacteria(100);Firmicutes(100);Clostridia(100);Clostridiales(100);Lachnospiraceae(100);Lachnospiraceae_unclassified(100);
Otu0802	14	Bacteria(100);Proteobacteria(100);Alphaproteobacteria(100);Rhizobiales(100);Bradyrhizobiaceae(100);Bosea(100);
Otu0803	14	Bacteria(100);Firmicutes(100);Clostridia(100);Clostridiales(100);Lachnospiraceae(100);Lachnospiraceae_unclassified(100);
Otu0804	14	Bacteria(100);Firmicutes(100);Clostridia(100);Clostridiales(100);Ruminococcaceae(100);Ruminococcaceae_unclassified(100);
Otu0805	14	Bacteria(100);Firmicutes(100);Clostridia(100);Clostridiales(100);Clostridiales_unclassified(86);Clostridiales_unclassified(86);
Otu0806	14	Bacteria(100);Firmicutes(100);Clostridia(100);Clostridiales(100);Clostridiales_unclassified(100);Clostridiales_unclassified(100);
Otu0807	14	Bacteria(100);Proteobacteria(100);Gammaproteobacteria(100);Pseudomonadales(100);Moraxellaceae(100);Acinetobacter(100);
Otu0808	14	Bacteria(100);Proteobacteria(100);Gammaproteobacteria(100);Enterobacteriales(100);Enterobacteriaceae(100);Enterobacteriaceae_unclassified(100);
Otu0809	14	Bacteria(100);Firmicutes(100);Clostridia(100);Clostridiales(100);Lachnospiraceae(93);Lachnospiraceae_unclassified(93);
Otu0810	14	Bacteria(100);Firmicutes(100);Clostridia(100);Clostridiales(100);Lachnospiraceae(100);Lachnospiraceae_unclassified(100);
Otu0811	14	Bacteria(100);Bacteroidetes(100);Bacteroidia(100);Bacteroidales(100);Porphyromonadaceae(93);Porphyromonadaceae_unclassified(93);
Otu0812	13	Bacteria(100);Actinobacteria(100);Actinobacteria(100);Solirubrobacterales(100);Solirubrobacteraceae(100);Solirubrobacter(100);
Otu0813	13	Bacteria(100);Firmicutes(100);Bacilli(100);Lactobacillales(100);Lactobacillaceae(100);Lactobacillus(100);
Otu0814	13	Bacteria(100);Firmicutes(100);Clostridia(100);Clostridiales(100);Peptostreptococcaceae(100);Peptostreptococcaceae_unclassified(100);
Otu0815	13	Bacteria(100);Firmicutes(100);Bacilli(100);Bacillales(100);Bacillales_unclassified(85);Bacillales_unclassified(85);
Otu0816	13	Bacteria(100);Actinobacteria(100);Actinobacteria(100);Coriobacteriales(100);Coriobacteriaceae(100);Coriobacteriaceae_unclassified(100);
Otu0817	13	Bacteria(100);Firmicutes(100);Clostridia(93);Clostridiales(93);Clostridiales_unclassified(93);Clostridiales_unclassified(93);
Otu0818	13	Bacteria(100);Firmicutes(100);Erysipelotrichia(100);Erysipelotrichales(100);Erysipelotrichaceae(100);Clostridium_XVIII(100);
Otu0819	13	Bacteria(100);Firmicutes(100);Clostridia(100);Clostridiales(100);Lachnospiraceae(100);Lachnospiraceae_unclassified(85);
Otu0820	13	Bacteria(100);Firmicutes(77);Firmicutes_unclassified(77);Firmicutes_unclassified(77);Firmicutes_unclassified(77);Firmicutes_unclassified(77);
Otu0821	13	Bacteria(100);Firmicutes(100);Clostridia(100);Clostridiales(100);Ruminococcaceae(100);Ruminococcaceae_unclassified(62);
Otu0822	13	Bacteria(100);Bacteroidetes(100);Bacteroidia(100);Bacteroidales(100);Porphyromonadaceae(85);Porphyromonadaceae_unclassified(85);
Otu0823	13	Bacteria(100);Bacteroidetes(100);Bacteroidia(100);Bacteroidales(100);Porphyromonadaceae(93);Porphyromonadaceae_unclassified(93);
Otu0824	13	Bacteria(100);Firmicutes(100);Clostridia(100);Clostridiales(100);Clostridiales_Incertae_Sedis_XI(100);Clostridiales_Incertae_Sedis_XI_unclassified(100);
Otu0825	13	Bacteria(100);Bacteroidetes(100);Bacteroidia(100);Bacteroidales(100);Porphyromonadaceae(100);Porphyromonadaceae_unclassified(100);
Otu0826	13	Bacteria(100);Firmicutes(100);Clostridia(100);Clostridiales(100);Ruminococcaceae(100);Oscillibacter(100);
Otu0827	13	Bacteria(100);Firmicutes(100);Clostridia(100);Clostridiales(100);Lachnospiraceae(100);Lachnospiraceae_unclassified(100);
Otu0828	13	Bacteria(100);Firmicutes(100);Clostridia(100);Clostridiales(100);Lachnospiraceae(100);Lachnospiraceae_unclassified(54);
Otu0829	13	Bacteria(100);Bacteroidetes(100);Bacteroidia(100);Bacteroidales(100);Porphyromonadaceae(100);Porphyromonadaceae_unclassified(100);
Otu0830	13	Bacteria(100);Firmicutes(100);Clostridia(100);Clostridiales(100);Clostridiaceae_1(100);Clostridiaceae_1_unclassified(100);
Otu0831	13	Bacteria(100);Firmicutes(100);Bacilli(100);Bacillales(100);Bacillaceae_2(100);Virgibacillus(77);
Otu0832	13	Bacteria(100);Bacteroidetes(100);Bacteroidia(100);Bacteroidales(100);Porphyromonadaceae(100);Porphyromonadaceae_unclassified(100);
Otu0833	13	Bacteria(100);Proteobacteria(100);Gammaproteobacteria(100);Enterobacteriales(100);Enterobacteriaceae(100);Enterobacteriaceae_unclassified(100);
Otu0834	13	Bacteria(100);Proteobacteria(100);Alphaproteobacteria(100);Rhizobiales(100);Beijerinckiaceae(100);Chelatococcus(100);
Otu0835	13	Bacteria(100);Firmicutes(77);Clostridia(62);Clostridiales(54);Clostridiales_unclassified(54);Clostridiales_unclassified(54);
Otu0836	13	Bacteria(100);Bacteroidetes(100);Bacteroidia(100);Bacteroidales(100);Porphyromonadaceae(100);Porphyromonadaceae_unclassified(100);
Otu0837	13	Bacteria(100);Firmicutes(100);Clostridia(100);Clostridiales(100);Lachnospiraceae(100);Acetatifactor(100);
Otu0838	13	Bacteria(100);Bacteroidetes(100);Bacteroidia(100);Bacteroidales(100);Porphyromonadaceae(100);Porphyromonadaceae_unclassified(100);
Otu0839	12	Bacteria(100);Bacteroidetes(100);Bacteroidia(100);Bacteroidales(100);Porphyromonadaceae(100);Porphyromonadaceae_unclassified(100);
Otu0840	12	Bacteria(100);Bacteria_unclassified(100);Bacteria_unclassified(100);Bacteria_unclassified(100);Bacteria_unclassified(100);Bacteria_unclassified(100);
Otu0841	12	Bacteria(100);Bacteroidetes(100);Flavobacteriia(100);Flavobacteriales(100);Flavobacteriaceae(100);Cloacibacterium(100);
Otu0842	12	Bacteria(100);Firmicutes(100);Clostridia(100);Clostridiales(100);Lachnospiraceae(100);Clostridium_XlVb(100);
Otu0843	12	Bacteria(100);Actinobacteria(100);Actinobacteria(100);Actinomycetales(100);Nocardioidaceae(100);Nocardioides(100);
Otu0844	12	Bacteria(100);Firmicutes(100);Clostridia(100);Clostridiales(100);Ruminococcaceae(100);Pseudoflavonifractor(100);
Otu0845	12	Bacteria(100);Bacteroidetes(100);Bacteroidia(100);Bacteroidales(100);Porphyromonadaceae(100);Porphyromonadaceae_unclassified(100);
Otu0846	12	Bacteria(100);Firmicutes(100);Clostridia(100);Clostridiales(100);Lachnospiraceae(100);Lachnospiraceae_unclassified(100);
Otu0847	12	Bacteria(100);Firmicutes(100);Clostridia(100);Clostridiales(100);Clostridiales_Incertae_Sedis_XI(100);Anaerococcus(100);
Otu0848	12	Bacteria(100);Firmicutes(100);Clostridia(100);Clostridiales(100);Lachnospiraceae(100);Lachnospiraceae_unclassified(92);
Otu0849	12	Bacteria(100);Firmicutes(100);Clostridia(100);Clostridiales(100);Lachnospiraceae(100);Lachnospiraceae_unclassified(100);
Otu0850	12	Bacteria(100);Firmicutes(100);Clostridia(100);Clostridiales(100);Lachnospiraceae(100);Lachnospiraceae_unclassified(100);
Otu0851	12	Bacteria(100);Firmicutes(100);Clostridia(100);Clostridiales(100);Clostridiales_unclassified(100);Clostridiales_unclassified(100);
Otu0852	12	Bacteria(100);Firmicutes(100);Clostridia(100);Clostridiales(100);Ruminococcaceae(100);Ruminococcaceae_unclassified(75);
Otu0853	12	Bacteria(100);Firmicutes(100);Clostridia(100);Clostridiales(100);Clostridiales_unclassified(100);Clostridiales_unclassified(100);
Otu0854	12	Bacteria(100);Firmicutes(100);Bacilli(100);Bacillales(100);Bacillales_unclassified(84);Bacillales_unclassified(84);
Otu0855	12	Bacteria(100);Actinobacteria(100);Actinobacteria(100);Coriobacteriales(100);Coriobacteriaceae(100);Asaccharobacter(84);
Otu0856	12	Bacteria(100);Firmicutes(100);Clostridia(92);Clostridia_unclassified(67);Clostridia_unclassified(67);Clostridia_unclassified(67);
Otu0857	12	Bacteria(100);Bacteroidetes(100);Bacteroidia(100);Bacteroidales(100);Porphyromonadaceae(92);Porphyromonadaceae_unclassified(92);
Otu0858	12	Bacteria(100);Bacteroidetes(100);Bacteroidia(100);Bacteroidales(100);Porphyromonadaceae(100);Porphyromonadaceae_unclassified(100);
Otu0859	12	Bacteria(100);Firmicutes(100);Clostridia(100);Clostridiales(100);Lachnospiraceae(84);Lachnospiraceae_unclassified(75);
Otu0860	12	Bacteria(100);Bacteroidetes(100);Bacteroidia(100);Bacteroidales(100);Porphyromonadaceae(92);Porphyromonadaceae_unclassified(92);
Otu0861	12	Bacteria(100);Bacteria_unclassified(92);Bacteria_unclassified(92);Bacteria_unclassified(92);Bacteria_unclassified(92);Bacteria_unclassified(92);
Otu0862	12	Bacteria(100);Firmicutes(100);Clostridia(100);Clostridiales(100);Lachnospiraceae(100);Lachnospiraceae_unclassified(100);
Otu0863	12	Bacteria(100);Firmicutes(100);Clostridia(100);Clostridiales(100);Lachnospiraceae(100);Lachnospiraceae_unclassified(100);
Otu0864	12	Bacteria(100);Bacteroidetes(100);Bacteroidia(100);Bacteroidales(100);Porphyromonadaceae(100);Porphyromonadaceae_unclassified(100);
Otu0865	12	Bacteria(100);Firmicutes(100);Bacilli(100);Bacillales(100);Bacillaceae_2(100);Sinibacillus(100);
Otu0866	12	Bacteria(100);Firmicutes(100);Clostridia(100);Clostridiales(100);Clostridiales_unclassified(100);Clostridiales_unclassified(100);
Otu0867	12	Bacteria(100);Firmicutes(100);Clostridia(100);Clostridiales(100);Lachnospiraceae(100);Lachnospiraceae_unclassified(100);
Otu0868	12	Bacteria(100);Firmicutes(100);Bacilli(100);Bacillales(100);Bacillaceae_2(100);Bacillaceae_2_unclassified(100);
Otu0869	12	Bacteria(100);Firmicutes(100);Clostridia(100);Clostridiales(100);Ruminococcaceae(100);Ruminococcaceae_unclassified(100);
Otu0870	12	Bacteria(100);Firmicutes(100);Bacilli(100);Bacillales(100);Paenibacillaceae_1(100);Paenibacillus(100);
Otu0871	11	Bacteria(100);Firmicutes(100);Bacilli(100);Bacillales(100);Bacillaceae_2(100);Terribacillus(100);
Otu0872	11	Bacteria(100);Firmicutes(100);Bacilli(100);Lactobacillales(100);Lactobacillaceae(91);Lactobacillus(91);
Otu0873	11	Bacteria(100);Bacteroidetes(100);Bacteroidia(100);Bacteroidales(100);Bacteroidaceae(100);Bacteroides(100);
Otu0874	11	Bacteria(100);Firmicutes(100);Firmicutes_unclassified(55);Firmicutes_unclassified(55);Firmicutes_unclassified(55);Firmicutes_unclassified(55);
Otu0875	11	Bacteria(100);Actinobacteria(100);Actinobacteria(100);Actinomycetales(100);Nocardioidaceae(100);Kribbella(100);
Otu0876	11	Bacteria(100);Firmicutes(100);Clostridia(100);Clostridiales(100);Lachnospiraceae(100);Lachnospiraceae_unclassified(100);
Otu0877	11	Bacteria(100);Firmicutes(100);Clostridia(100);Clostridiales(100);Lachnospiraceae(100);Dorea(100);
Otu0878	11	Bacteria(100);Proteobacteria(100);Alphaproteobacteria(100);Alphaproteobacteria_incertae_sedis(100);Geminicoccus(100);Geminicoccus_unclassified(100);
Otu0879	11	Bacteria(100);Bacteroidetes(100);Bacteroidia(100);Bacteroidales(100);Porphyromonadaceae(100);Porphyromonadaceae_unclassified(100);
Otu0880	11	Bacteria(100);Firmicutes(100);Clostridia(100);Clostridiales(100);Lachnospiraceae(100);Lachnospiraceae_unclassified(100);
Otu0881	11	Bacteria(100);Firmicutes(100);Clostridia(100);Clostridiales(100);Lachnospiraceae(100);Lachnospiraceae_unclassified(100);
Otu0882	11	Bacteria(100);Verrucomicrobia(100);Verrucomicrobiae(100);Verrucomicrobiales(100);Verrucomicrobiaceae(100);Akkermansia(100);
Otu0883	11	Bacteria(100);Firmicutes(100);Erysipelotrichia(91);Erysipelotrichales(91);Erysipelotrichaceae(91);Turicibacter(91);
Otu0884	11	Bacteria(100);Actinobacteria(100);Actinobacteria(100);Actinomycetales(100);Intrasporangiaceae(100);Intrasporangiaceae_unclassified(100);
Otu0885	11	Bacteria(100);Firmicutes(100);Clostridia(100);Clostridiales(100);Ruminococcaceae(100);Butyricicoccus(91);
Otu0886	11	Bacteria(100);Firmicutes(100);Clostridia(100);Clostridiales(100);Ruminococcaceae(100);Ruminococcaceae_unclassified(100);
Otu0887	11	Bacteria(100);Firmicutes(100);Clostridia(100);Clostridiales(100);Ruminococcaceae(73);Oscillibacter(73);
Otu0888	11	Bacteria(100);Firmicutes(100);Clostridia(100);Clostridiales(100);Clostridiales_unclassified(64);Clostridiales_unclassified(64);
Otu0889	11	Bacteria(100);Actinobacteria(100);Actinobacteria(100);Coriobacteriales(100);Coriobacteriaceae(100);Collinsella(100);
Otu0890	11	Bacteria(100);Firmicutes(100);Clostridia(100);Clostridiales(100);Ruminococcaceae(100);Oscillibacter(100);
Otu0891	11	Bacteria(100);Firmicutes(100);Clostridia(100);Clostridiales(100);Lachnospiraceae(100);Lachnospiraceae_unclassified(100);
Otu0892	11	Bacteria(100);Bacteroidetes(100);Bacteroidia(100);Bacteroidales(100);Porphyromonadaceae(91);Porphyromonadaceae_unclassified(91);
Otu0893	11	Bacteria(100);Firmicutes(100);Clostridia(100);Clostridiales(100);Lachnospiraceae(100);Lachnospiraceae_unclassified(100);
Otu0894	11	Bacteria(100);Firmicutes(100);Clostridia(100);Clostridiales(100);Lachnospiraceae(100);Lachnospiraceae_unclassified(100);
Otu0895	11	Bacteria(100);Firmicutes(100);Clostridia(100);Clostridiales(100);Ruminococcaceae(100);Ruminococcaceae_unclassified(100);
Otu0896	11	Bacteria(100);Bacteroidetes(100);Bacteroidia(100);Bacteroidales(100);Porphyromonadaceae(100);Porphyromonadaceae_unclassified(100);
Otu0897	11	Bacteria(100);Firmicutes(100);Clostridia(100);Clostridiales(100);Lachnospiraceae(100);Lachnospiraceae_unclassified(100);
Otu0898	11	Bacteria(100);Actinobacteria(100);Actinobacteria(100);Coriobacteriales(100);Coriobacteriaceae(100);Asaccharobacter(64);
Otu0899	11	Bacteria(100);Firmicutes(100);Clostridia(100);Clostridiales(100);Lachnospiraceae(100);Lachnospiraceae_unclassified(100);
Otu0900	11	Bacteria(100);Proteobacteria(100);Alphaproteobacteria(100);Sphingomonadales(100);Sphingomonadaceae(100);Sphingomonas(100);
Otu0901	11	Bacteria(100);Firmicutes(100);Clostridia(100);Clostridiales(100);Lachnospiraceae(100);Clostridium_XlVa(55);
Otu0902	11	Bacteria(100);Firmicutes(100);Clostridia(100);Clostridiales(100);Ruminococcaceae(100);Ruminococcaceae_unclassified(100);
Otu0903	11	Bacteria(100);Bacteroidetes(100);Bacteroidia(100);Bacteroidales(100);Porphyromonadaceae(100);Porphyromonadaceae_unclassified(100);
Otu0904	11	Bacteria(100);Firmicutes(100);Firmicutes_unclassified(91);Firmicutes_unclassified(91);Firmicutes_unclassified(91);Firmicutes_unclassified(91);
Otu0905	11	Bacteria(100);Firmicutes(100);Clostridia(100);Clostridiales(100);Lachnospiraceae(100);Lachnospiraceae_unclassified(100);
Otu0906	11	Bacteria(100);Firmicutes(100);Bacilli(100);Bacillales(100);Thermoactinomycetaceae_1(100);Kroppenstedtia(100);
Otu0907	11	Bacteria(100);Proteobacteria(100);Gammaproteobacteria(100);Xanthomonadales(100);Xanthomonadaceae(100);Stenotrophomonas(100);
Otu0908	11	Bacteria(100);Firmicutes(100);Clostridia(100);Clostridiales(100);Clostridiales_unclassified(100);Clostridiales_unclassified(100);
Otu0909	11	Bacteria(100);Firmicutes(100);Bacilli(100);Lactobacillales(100);Carnobacteriaceae(100);Carnobacterium(100);
Otu0910	11	Bacteria(100);Bacteroidetes(100);Bacteroidia(82);Bacteroidales(82);Bacteroidales_unclassified(82);Bacteroidales_unclassified(82);
Otu0911	11	Bacteria(100);Firmicutes(100);Clostridia(100);Clostridiales(100);Clostridiales_unclassified(64);Clostridiales_unclassified(64);
Otu0912	11	Bacteria(100);Firmicutes(100);Bacilli(100);Lactobacillales(100);Lactobacillaceae(91);Lactobacillus(91);
Otu0913	10	Bacteria(100);Firmicutes(100);Clostridia(100);Clostridiales(100);Lachnospiraceae(100);Lachnospiraceae_unclassified(100);
Otu0914	10	Bacteria(100);Firmicutes(100);Clostridia(100);Clostridiales(100);Lachnospiraceae(70);Lachnospiraceae_unclassified(70);
Otu0915	10	Bacteria(100);Actinobacteria(100);Actinobacteria(100);Actinobacteria_unclassified(100);Actinobacteria_unclassified(100);Actinobacteria_unclassified(100);
Otu0916	10	Bacteria(100);Firmicutes(100);Clostridia(100);Clostridiales(100);Clostridiales_Incertae_Sedis_XI(100);Clostridiales_Incertae_Sedis_XI_unclassified(100);
Otu0917	10	Bacteria(100);Firmicutes(61);Firmicutes_unclassified(61);Firmicutes_unclassified(61);Firmicutes_unclassified(61);Firmicutes_unclassified(61);
Otu0918	10	Bacteria(100);Firmicutes(100);Clostridia(100);Clostridiales(100);Lachnospiraceae(100);Lachnospiraceae_unclassified(100);
Otu0919	10	Bacteria(100);Bacteroidetes(100);Bacteroidia(100);Bacteroidales(100);Porphyromonadaceae(100);Porphyromonadaceae_unclassified(100);
Otu0920	10	Bacteria(100);Bacteroidetes(100);Bacteroidia(100);Bacteroidales(100);Porphyromonadaceae(100);Porphyromonadaceae_unclassified(100);
Otu0921	10	Bacteria(100);Firmicutes(100);Clostridia(100);Clostridiales(100);Peptostreptococcaceae(100);Romboutsia(100);
Otu0922	10	Bacteria(100);Firmicutes(100);Clostridia(100);Clostridiales(100);Lachnospiraceae(100);Lachnospiraceae_unclassified(100);
Otu0923	10	Bacteria(100);Firmicutes(100);Bacilli(100);Bacillales(100);Bacillales_unclassified(100);Bacillales_unclassified(100);
Otu0924	10	Bacteria(100);Firmicutes(100);Clostridia(100);Clostridiales(100);Clostridiales_unclassified(90);Clostridiales_unclassified(90);
Otu0925	10	Bacteria(100);Firmicutes(100);Clostridia(100);Clostridiales(100);Clostridiales_unclassified(100);Clostridiales_unclassified(100);
Otu0926	10	Bacteria(100);Proteobacteria(100);Gammaproteobacteria(100);Pseudomonadales(100);Moraxellaceae(100);Moraxellaceae_unclassified(100);
Otu0927	10	Bacteria(100);Firmicutes(100);Clostridia(100);Clostridiales(90);Clostridiales_unclassified(90);Clostridiales_unclassified(90);
Otu0928	10	Bacteria(100);Firmicutes(100);Clostridia(100);Clostridiales(100);Clostridiales_unclassified(100);Clostridiales_unclassified(100);
Otu0929	10	Bacteria(100);Firmicutes(100);Clostridia(100);Clostridiales(61);Clostridiales_unclassified(61);Clostridiales_unclassified(61);
Otu0930	10	Bacteria(100);Proteobacteria(100);Betaproteobacteria(100);Burkholderiales(100);Oxalobacteraceae(100);Herbaspirillum(61);
Otu0931	10	Bacteria(100);Firmicutes(100);Clostridia(100);Clostridiales(100);Lachnospiraceae(100);Lachnospiraceae_unclassified(100);
Otu0932	10	Bacteria(100);Firmicutes(100);Clostridia(100);Clostridiales(100);Lachnospiraceae(100);Lachnospiraceae_unclassified(100);
Otu0933	10	Bacteria(100);Bacteria_unclassified(100);Bacteria_unclassified(100);Bacteria_unclassified(100);Bacteria_unclassified(100);Bacteria_unclassified(100);
Otu0934	10	Bacteria(100);Firmicutes(100);Bacilli(100);Bacillales(100);Paenibacillaceae_1(100);Cohnella(100);
Otu0935	10	Bacteria(100);Firmicutes(100);Clostridia(100);Clostridiales(100);Ruminococcaceae(100);Ruminococcaceae_unclassified(100);
Otu0936	10	Bacteria(100);Actinobacteria(100);Actinobacteria(100);Actinomycetales(100);Nocardiaceae(100);Rhodococcus(100);
Otu0937	10	Bacteria(100);Firmicutes(100);Clostridia(100);Clostridiales(100);Clostridiales_unclassified(100);Clostridiales_unclassified(100);
Otu0938	10	Bacteria(100);Bacteroidetes(100);Bacteroidia(100);Bacteroidales(100);Porphyromonadaceae(61);Porphyromonadaceae_unclassified(61);
Otu0939	10	Bacteria(100);Bacteroidetes(100);Bacteroidia(100);Bacteroidales(100);Porphyromonadaceae(100);Porphyromonadaceae_unclassified(100);
Otu0940	10	Bacteria(100);Firmicutes(100);Clostridia(100);Clostridiales(100);Lachnospiraceae(100);Lachnospiraceae_unclassified(100);
Otu0941	10	Bacteria(100);Firmicutes(100);Clostridia(100);Clostridiales(100);Ruminococcaceae(100);Ruminococcaceae_unclassified(100);
Otu0942	10	Bacteria(100);Firmicutes(100);Clostridia(80);Clostridiales(80);Clostridiales_unclassified(80);Clostridiales_unclassified(80);
Otu0943	10	Bacteria(100);Bacteroidetes(100);Bacteroidia(100);Bacteroidales(100);Porphyromonadaceae(100);Porphyromonadaceae_unclassified(100);
Otu0944	10	Bacteria(100);Firmicutes(100);Clostridia(100);Clostridiales(100);Clostridiales_Incertae_Sedis_XI(100);Clostridiales_Incertae_Sedis_XI_unclassified(100);
Otu0945	10	Bacteria(100);Firmicutes(100);Clostridia(100);Clostridiales(100);Ruminococcaceae(100);Ruminococcaceae_unclassified(100);
Otu0946	10	Bacteria(100);Firmicutes(100);Clostridia(100);Clostridiales(100);Clostridiaceae_1(100);Clostridium_sensu_stricto(100);
Otu0947	10	Bacteria(100);Firmicutes(100);Erysipelotrichia(100);Erysipelotrichales(100);Erysipelotrichaceae(100);Clostridium_XVIII(100);
Otu0948	10	Bacteria(100);Firmicutes(100);Bacilli(100);Bacillales(100);Paenibacillaceae_1(100);Paenibacillus(100);
Otu0949	10	Bacteria(100);Firmicutes(100);Clostridia(100);Clostridiales(100);Peptostreptococcaceae(100);Peptostreptococcaceae_unclassified(100);
Otu0950	10	Bacteria(100);Bacteroidetes(100);Bacteroidia(100);Bacteroidales(100);Porphyromonadaceae(90);Porphyromonadaceae_unclassified(90);
Otu0951	9	Bacteria(100);Firmicutes(100);Clostridia(100);Clostridiales(100);Lachnospiraceae(67);Lachnospiraceae_unclassified(67);
Otu0952	9	Bacteria(100);Firmicutes(100);Clostridia(100);Clostridiales(100);Lachnospiraceae(100);Dorea(56);
Otu0953	9	Bacteria(100);Bacteroidetes(100);Bacteroidia(100);Bacteroidales(100);Porphyromonadaceae(100);Porphyromonadaceae_unclassified(100);
Otu0954	9	Bacteria(100);Bacteria_unclassified(78);Bacteria_unclassified(78);Bacteria_unclassified(78);Bacteria_unclassified(78);Bacteria_unclassified(78);
Otu0955	9	Bacteria(100);Firmicutes(100);Clostridia(100);Clostridiales(100);Ruminococcaceae(100);Pseudoflavonifractor(100);
Otu0956	9	Bacteria(100);Firmicutes(100);Clostridia(100);Clostridiales(100);Clostridiales_unclassified(67);Clostridiales_unclassified(67);
Otu0957	9	Bacteria(100);Firmicutes(100);Clostridia(100);Clostridiales(100);Lachnospiraceae(100);Lachnospiraceae_unclassified(100);
Otu0958	9	Bacteria(100);Firmicutes(100);Clostridia(100);Clostridiales(100);Lachnospiraceae(100);Lachnospiraceae_unclassified(100);
Otu0959	9	Bacteria(100);Firmicutes(100);Clostridia(100);Clostridiales(100);Clostridiaceae_1(100);Clostridium_sensu_stricto(100);
Otu0960	9	Bacteria(100);Firmicutes(100);Clostridia(100);Clostridiales(100);Clostridiaceae_1(100);Clostridium_sensu_stricto(78);
Otu0961	9	Bacteria(100);Firmicutes(100);Clostridia(100);Clostridiales(100);Lachnospiraceae(100);Lachnospiraceae_unclassified(100);
Otu0962	9	Bacteria(100);Firmicutes(100);Bacilli(100);Bacillales(100);Paenibacillaceae_1(100);Saccharibacillus(100);
Otu0963	9	Bacteria(100);Firmicutes(100);Clostridia(100);Clostridiales(100);Peptoniphilaceae(100);Peptoniphilaceae_unclassified(100);
Otu0964	9	Bacteria(100);Actinobacteria(100);Actinobacteria(100);Actinomycetales(100);Microbacteriaceae(100);Microbacteriaceae_unclassified(67);
Otu0965	9	Bacteria(100);Firmicutes(100);Bacilli(100);Lactobacillales(100);Lactobacillaceae(100);Lactobacillus(100);
Otu0966	9	Bacteria(100);Actinobacteria(100);Actinobacteria(100);Actinomycetales(100);Pseudonocardiaceae(100);Pseudonocardia(100);
Otu0967	9	Bacteria(100);Bacteroidetes(100);Bacteroidia(100);Bacteroidales(100);Porphyromonadaceae(100);Porphyromonadaceae_unclassified(100);
Otu0968	9	Bacteria(100);Firmicutes(100);Clostridia(100);Clostridiales(100);Lachnospiraceae(89);Lachnospiraceae_unclassified(89);
Otu0969	9	Bacteria(100);Bacteroidetes(100);Bacteroidia(100);Bacteroidales(100);Porphyromonadaceae(100);Porphyromonadaceae_unclassified(100);
Otu0970	9	Bacteria(100);Firmicutes(100);Clostridia(100);Clostridiales(100);Lachnospiraceae(100);Lachnospiraceae_unclassified(100);
Otu0971	9	Bacteria(100);Firmicutes(100);Clostridia(100);Clostridiales(100);Lachnospiraceae(100);Lachnospiraceae_unclassified(100);
Otu0972	9	Bacteria(100);Bacteroidetes(100);Bacteroidia(100);Bacteroidales(100);Porphyromonadaceae(100);Porphyromonadaceae_unclassified(100);
Otu0973	9	Bacteria(100);Bacteroidetes(100);Bacteroidia(100);Bacteroidales(100);Porphyromonadaceae(100);Porphyromonadaceae_unclassified(100);
Otu0974	9	Bacteria(100);Firmicutes(100);Clostridia(100);Clostridiales(100);Clostridiales_unclassified(100);Clostridiales_unclassified(100);
Otu0975	9	Bacteria(100);Bacteroidetes(100);Bacteroidia(100);Bacteroidales(100);Porphyromonadaceae(100);Porphyromonadaceae_unclassified(100);
Otu0976	9	Bacteria(100);Firmicutes(100);Clostridia(100);Clostridiales(100);Lachnospiraceae(100);Lachnospiraceae_unclassified(67);
Otu0977	9	Bacteria(100);Firmicutes(100);Clostridia(100);Clostridiales(100);Lachnospiraceae(100);Lachnospiraceae_unclassified(89);
Otu0978	9	Bacteria(100);Firmicutes(100);Clostridia(100);Clostridiales(100);Lachnospiraceae(100);Lachnospiraceae_unclassified(100);
Otu0979	9	Bacteria(100);Bacteroidetes(100);Bacteroidia(100);Bacteroidales(100);Porphyromonadaceae(89);Porphyromonadaceae_unclassified(89);
Otu0980	9	Bacteria(100);Bacteroidetes(100);Bacteroidia(100);Bacteroidales(100);Porphyromonadaceae(100);Porphyromonadaceae_unclassified(100);
Otu0981	9	Bacteria(100);Bacteroidetes(100);Bacteroidia(100);Bacteroidales(100);Rikenellaceae(100);Alistipes(100);
Otu0982	9	Bacteria(100);Firmicutes(100);Clostridia(100);Clostridiales(100);Lachnospiraceae(100);Lachnospiraceae_unclassified(100);
Otu0983	9	Bacteria(100);Firmicutes(100);Clostridia(100);Clostridiales(100);Lachnospiraceae(100);Lachnospiraceae_unclassified(100);
Otu0984	9	Bacteria(100);Firmicutes(100);Clostridia(100);Clostridiales(100);Lachnospiraceae(100);Lachnospiraceae_unclassified(100);
Otu0985	9	Bacteria(100);Firmicutes(100);Clostridia(100);Clostridiales(100);Lachnospiraceae(100);Lachnospiraceae_unclassified(100);
Otu0986	9	Bacteria(100);Firmicutes(100);Clostridia(100);Clostridiales(100);Lachnospiraceae(100);Lachnospiraceae_unclassified(100);
Otu0987	9	Bacteria(100);Bacteroidetes(100);Bacteroidia(100);Bacteroidales(100);Rikenellaceae(100);Alistipes(100);
Otu0988	9	Bacteria(100);Firmicutes(100);Clostridia(100);Clostridiales(100);Lachnospiraceae(100);Lachnospiraceae_unclassified(100);
Otu0989	9	Bacteria(100);Firmicutes(100);Clostridia(100);Clostridiales(100);Lachnospiraceae(100);Lachnospiraceae_unclassified(100);
Otu0990	9	Bacteria(100);Firmicutes(100);Clostridia(100);Clostridiales(100);Lachnospiraceae(100);Lachnospiraceae_unclassified(100);
Otu0991	9	Bacteria(100);Bacteria_unclassified(100);Bacteria_unclassified(100);Bacteria_unclassified(100);Bacteria_unclassified(100);Bacteria_unclassified(100);
Otu0992	9	Bacteria(100);Firmicutes(100);Clostridia(100);Clostridiales(100);Lachnospiraceae(100);Lachnospiraceae_unclassified(56);
Otu0993	9	Bacteria(100);Firmicutes(100);Clostridia(100);Clostridiales(100);Ruminococcaceae(100);Ruminococcaceae_unclassified(100);
Otu0994	9	Bacteria(100);Actinobacteria(100);Actinobacteria(100);Coriobacteriales(100);Coriobacteriaceae(100);Asaccharobacter(100);
Otu0995	9	Bacteria(100);Firmicutes(100);Bacilli(100);Lactobacillales(100);Lactobacillaceae(100);Lactobacillaceae_unclassified(89);
Otu0996	9	Bacteria(100);Firmicutes(100);Clostridia(100);Clostridiales(100);Lachnospiraceae(100);Lachnospiraceae_unclassified(100);
Otu0997	9	Bacteria(100);Bacteroidetes(100);Bacteroidia(100);Bacteroidales(100);Porphyromonadaceae(100);Porphyromonadaceae_unclassified(100);
Otu0998	9	Bacteria(100);Firmicutes(100);Clostridia(100);Clostridiales(89);Clostridiales_unclassified(89);Clostridiales_unclassified(89);
Otu0999	9	Bacteria(100);Firmicutes(100);Clostridia(100);Clostridiales(100);Lachnospiraceae(100);Lachnospiraceae_unclassified(100);
Otu1000	9	Bacteria(100);Proteobacteria(100);Alphaproteobacteria(100);Rhizobiales(100);Hyphomicrobiaceae(100);Devosia(100);
Otu1001	9	Bacteria(100);Firmicutes(100);Clostridia(100);Clostridiales(100);Clostridiales_Incertae_Sedis_III(100);Tepidanaerobacter(100);
Otu1002	9	Bacteria(100);Bacteria_unclassified(100);Bacteria_unclassified(100);Bacteria_unclassified(100);Bacteria_unclassified(100);Bacteria_unclassified(100);
Otu1003	9	Bacteria(100);Actinobacteria(100);Actinobacteria(100);Actinomycetales(100);Nocardioidaceae(100);Nocardioides(100);
Otu1004	9	Bacteria(100);Firmicutes(100);Clostridia(100);Clostridiales(100);Clostridiales_unclassified(100);Clostridiales_unclassified(100);
Otu1005	9	Bacteria(100);Firmicutes(100);Bacilli(100);Bacillales(100);Paenibacillaceae_1(100);Paenibacillus(100);
Otu1006	8	Bacteria(100);Firmicutes(100);Clostridia(100);Clostridiales(100);Clostridiales_Incertae_Sedis_XI(100);Anaerococcus(100);
Otu1007	8	Bacteria(100);Firmicutes(100);Clostridia(88);Clostridiales(88);Clostridiales_unclassified(88);Clostridiales_unclassified(88);
Otu1008	8	Bacteria(100);Proteobacteria(100);Betaproteobacteria(100);Burkholderiales(100);Burkholderiales_incertae_sedis(100);Tepidimonas(100);
Otu1009	8	Bacteria(100);Actinobacteria(100);Actinobacteria(100);Actinomycetales(100);Bogoriellaceae(100);Georgenia(100);
Otu1010	8	Bacteria(100);Firmicutes(100);Clostridia(100);Clostridiales(100);Lachnospiraceae(100);Lachnospiraceae_unclassified(100);
Otu1011	8	Bacteria(100);Proteobacteria(100);Gammaproteobacteria(100);Alteromonadales(100);Shewanellaceae(100);Shewanella(100);
Otu1012	8	Bacteria(100);Bacteroidetes(100);Bacteroidia(100);Bacteroidales(100);Porphyromonadaceae(100);Porphyromonadaceae_unclassified(100);
Otu1013	8	Bacteria(100);Bacteroidetes(100);Bacteroidia(63);Bacteroidales(63);Bacteroidales_unclassified(63);Bacteroidales_unclassified(63);
Otu1014	8	Bacteria(100);Firmicutes(100);Clostridia(100);Clostridiales(100);Lachnospiraceae(100);Lachnospiraceae_unclassified(100);
Otu1015	8	Bacteria(100);Bacteroidetes(100);Bacteroidia(100);Bacteroidales(100);Porphyromonadaceae(100);Porphyromonadaceae_unclassified(100);
Otu1016	8	Bacteria(100);Firmicutes(100);Clostridia(100);Clostridiales(100);Lachnospiraceae(100);Lachnospiraceae_unclassified(100);
Otu1017	8	Bacteria(100);Firmicutes(100);Clostridia(100);Clostridiales(100);Lachnospiraceae(100);Lachnospiraceae_unclassified(100);
Otu1018	8	Bacteria(100);Firmicutes(100);Clostridia(100);Clostridiales(100);Lachnospiraceae(100);Lachnospiraceae_unclassified(100);
Otu1019	8	Bacteria(100);Firmicutes(100);Clostridia(100);Clostridiales(100);Lachnospiraceae(100);Lachnospiraceae_unclassified(100);
Otu1020	8	Bacteria(100);Firmicutes(100);Clostridia(100);Clostridiales(100);Clostridiaceae_1(100);Clostridium_sensu_stricto(100);
Otu1021	8	Bacteria(100);Firmicutes(100);Clostridia(100);Clostridiales(100);Ruminococcaceae(100);Ruminococcaceae_unclassified(100);
Otu1022	8	Bacteria(100);Bacteroidetes(100);Bacteroidia(100);Bacteroidales(100);Porphyromonadaceae(100);Porphyromonadaceae_unclassified(100);
Otu1023	8	Bacteria(100);Firmicutes(100);Clostridia(100);Clostridiales(100);Lachnospiraceae(100);Lachnospiraceae_unclassified(100);
Otu1024	8	Bacteria(100);Proteobacteria(100);Alphaproteobacteria(100);Rhizobiales(100);Methylobacteriaceae(100);Microvirga(100);
Otu1025	8	Bacteria(100);Bacteroidetes(100);Bacteroidia(100);Bacteroidales(100);Porphyromonadaceae(100);Porphyromonadaceae_unclassified(100);
Otu1026	8	Bacteria(100);Actinobacteria(100);Actinobacteria(100);Actinomycetales(100);Streptomycetaceae(100);Streptomyces(75);
Otu1027	8	Bacteria(100);Firmicutes(100);Clostridia(100);Clostridiales(100);Lachnospiraceae(100);Lachnospiraceae_unclassified(100);
Otu1028	8	Bacteria(100);Firmicutes(100);Clostridia(100);Clostridiales(100);Lachnospiraceae(100);Lachnospiraceae_unclassified(100);
Otu1029	8	Bacteria(100);Bacteroidetes(100);Bacteroidia(100);Bacteroidales(100);Porphyromonadaceae(100);Porphyromonadaceae_unclassified(100);
Otu1030	8	Bacteria(100);Firmicutes(100);Clostridia(100);Clostridiales(100);Lachnospiraceae(100);Acetatifactor(100);
Otu1031	8	Bacteria(100);Proteobacteria(100);Alphaproteobacteria(100);Rhizobiales(100);Hyphomicrobiaceae(100);Devosia(100);
Otu1032	8	Bacteria(100);Firmicutes(100);Bacilli(100);Bacillales(100);Thermoactinomycetaceae_1(100);Thermoactinomyces(100);
Otu1033	8	Bacteria(100);Firmicutes(100);Bacilli(100);Bacillales(100);Thermoactinomycetaceae_1(100);Shimazuella(100);
Otu1034	8	Bacteria(100);Firmicutes(100);Firmicutes_unclassified(100);Firmicutes_unclassified(100);Firmicutes_unclassified(100);Firmicutes_unclassified(100);
Otu1035	8	Bacteria(100);Firmicutes(100);Clostridia(88);Clostridiales(88);Clostridiales_unclassified(88);Clostridiales_unclassified(88);
Otu1036	8	Bacteria(100);Firmicutes(100);Bacilli(100);Lactobacillales(100);Streptococcaceae(100);Streptococcus(100);
Otu1037	8	Bacteria(100);Firmicutes(100);Clostridia(100);Clostridiales(100);Clostridiales_unclassified(100);Clostridiales_unclassified(100);
Otu1038	8	Bacteria(100);Bacteroidetes(100);Bacteroidia(100);Bacteroidales(100);Porphyromonadaceae(100);Porphyromonadaceae_unclassified(100);
Otu1039	8	Bacteria(100);Actinobacteria(100);Actinobacteria(100);Actinomycetales(100);Actinomycetaceae(100);Actinomyces(100);
Otu1040	8	Bacteria(100);Firmicutes(100);Clostridia(100);Clostridiales(100);Lachnospiraceae(100);Lachnospiraceae_unclassified(100);
Otu1041	8	Bacteria(100);Bacteria_unclassified(100);Bacteria_unclassified(100);Bacteria_unclassified(100);Bacteria_unclassified(100);Bacteria_unclassified(100);
Otu1042	8	Bacteria(100);Firmicutes(100);Clostridia(100);Clostridiales(100);Lachnospiraceae(100);Lachnospiraceae_unclassified(100);
Otu1043	8	Bacteria(100);Firmicutes(100);Clostridia(100);Clostridiales(100);Lachnospiraceae(100);Lachnospiraceae_unclassified(100);
Otu1044	8	Bacteria(100);Firmicutes(100);Clostridia(100);Clostridiales(100);Lachnospiraceae(100);Lachnospiraceae_unclassified(75);
Otu1045	8	Bacteria(100);Firmicutes(100);Clostridia(100);Clostridiales(100);Lachnospiraceae(100);Lachnospiraceae_unclassified(100);
Otu1046	8	Bacteria(100);Firmicutes(100);Bacilli(100);Bacillales(100);Staphylococcaceae(100);Staphylococcus(100);
Otu1047	8	Bacteria(100);Firmicutes(100);Clostridia(100);Clostridiales(100);Clostridiales_unclassified(100);Clostridiales_unclassified(100);
Otu1048	8	Bacteria(100);Firmicutes(100);Clostridia(100);Clostridiales(100);Clostridiaceae_1(100);Clostridiaceae_1_unclassified(100);
Otu1049	8	Bacteria(100);Firmicutes(100);Clostridia(100);Clostridiales(100);Lachnospiraceae(63);Lachnospiraceae_unclassified(63);
Otu1050	8	Bacteria(100);Firmicutes(100);Clostridia(100);Clostridiales(100);Clostridiales_unclassified(63);Clostridiales_unclassified(63);
Otu1051	8	Bacteria(100);Firmicutes(100);Clostridia(100);Clostridiales(100);Lachnospiraceae(88);Lachnospiraceae_unclassified(88);
Otu1052	8	Bacteria(100);Firmicutes(100);Clostridia(100);Clostridiales(100);Lachnospiraceae(100);Acetatifactor(100);
Otu1053	8	Bacteria(100);Firmicutes(100);Clostridia(100);Clostridiales(100);Ruminococcaceae(100);Ruminococcus(88);
Otu1054	8	Bacteria(100);Firmicutes(100);Clostridia(100);Clostridiales(100);Lachnospiraceae(100);Lachnospiraceae_unclassified(100);
Otu1055	8	Bacteria(100);Firmicutes(100);Bacilli(100);Lactobacillales(100);Lactobacillales_unclassified(100);Lactobacillales_unclassified(100);
Otu1056	8	Bacteria(100);Firmicutes(100);Bacilli(100);Lactobacillales(100);Enterococcaceae(100);Enterococcus(100);
Otu1057	8	Bacteria(100);Firmicutes(100);Clostridia(100);Clostridiales(100);Clostridiales_unclassified(75);Clostridiales_unclassified(75);
Otu1058	8	Bacteria(100);Firmicutes(100);Clostridia(100);Clostridiales(100);Lachnospiraceae(100);Lachnospiraceae_unclassified(100);
Otu1059	8	Bacteria(100);Bacteroidetes(100);Bacteroidia(100);Bacteroidales(100);Porphyromonadaceae(100);Porphyromonadaceae_unclassified(100);
Otu1060	8	Bacteria(100);Bacteroidetes(100);Bacteroidia(100);Bacteroidales(100);Porphyromonadaceae(100);Porphyromonadaceae_unclassified(100);
Otu1061	8	Bacteria(100);Firmicutes(100);Clostridia(100);Clostridiales(100);Lachnospiraceae(100);Lachnospiraceae_unclassified(100);
Otu1062	8	Bacteria(100);Bacteroidetes(100);Bacteroidia(100);Bacteroidales(100);Porphyromonadaceae(100);Porphyromonadaceae_unclassified(100);
Otu1063	8	Bacteria(100);Proteobacteria(100);Alphaproteobacteria(100);Rhizobiales(100);Methylobacteriaceae(100);Methylobacterium(100);
Otu1064	8	Bacteria(100);Firmicutes(100);Bacilli(100);Bacillales(100);Planococcaceae(100);Planococcaceae_unclassified(100);
Otu1065	8	Bacteria(100);Firmicutes(100);Clostridia(100);Clostridiales(100);Lachnospiraceae(100);Acetatifactor(63);
Otu1066	8	Bacteria(100);Bacteroidetes(100);Bacteroidia(100);Bacteroidales(100);Porphyromonadaceae(100);Porphyromonadaceae_unclassified(100);
Otu1067	8	Bacteria(100);Firmicutes(100);Clostridia(100);Clostridiales(100);Lachnospiraceae(100);Lachnospiraceae_unclassified(100);
Otu1068	8	Bacteria(100);Firmicutes(100);Clostridia(100);Clostridiales(100);Lachnospiraceae(100);Lachnospiraceae_unclassified(88);
Otu1069	8	Bacteria(100);Firmicutes(100);Clostridia(100);Clostridia_unclassified(75);Clostridia_unclassified(75);Clostridia_unclassified(75);
Otu1070	8	Bacteria(100);Bacteroidetes(100);Bacteroidia(100);Bacteroidales(100);Porphyromonadaceae(100);Porphyromonadaceae_unclassified(100);
Otu1071	8	Bacteria(100);Proteobacteria(100);Gammaproteobacteria(100);Aeromonadales(100);Succinivibrionaceae(100);Succinivibrio(100);
Otu1072	8	Bacteria(100);Firmicutes(100);Clostridia(100);Clostridiales(100);Lachnospiraceae(100);Lachnospiraceae_unclassified(100);
Otu1073	8	Bacteria(100);Bacteria_unclassified(100);Bacteria_unclassified(100);Bacteria_unclassified(100);Bacteria_unclassified(100);Bacteria_unclassified(100);
Otu1074	8	Bacteria(100);Firmicutes(100);Clostridia(100);Clostridiales(100);Lachnospiraceae(100);Lachnospiraceae_unclassified(100);
Otu1075	8	Bacteria(100);Firmicutes(100);Clostridia(100);Clostridiales(100);Lachnospiraceae(100);Lachnospiraceae_unclassified(100);
Otu1076	8	Bacteria(100);Firmicutes(100);Clostridia(100);Clostridiales(100);Clostridiaceae_1(100);Clostridium_sensu_stricto(100);
Otu1077	8	Bacteria(100);Firmicutes(100);Clostridia(100);Clostridiales(100);Lachnospiraceae(100);Lachnospiraceae_unclassified(100);
Otu1078	8	Bacteria(100);Firmicutes(100);Clostridia(100);Clostridiales(100);Clostridiales_unclassified(100);Clostridiales_unclassified(100);
Otu1079	7	Bacteria(100);Firmicutes(100);Clostridia(100);Clostridiales(100);Lachnospiraceae(100);Lachnospiraceae_unclassified(100);
Otu1080	7	Bacteria(100);Firmicutes(100);Clostridia(100);Clostridiales(100);Clostridiales_unclassified(58);Clostridiales_unclassified(58);
Otu1081	7	Bacteria(100);Firmicutes(100);Clostridia(100);Clostridiales(100);Lachnospiraceae(100);Lachnospiraceae_unclassified(100);
Otu1082	7	Bacteria(100);Bacteroidetes(100);Bacteroidia(100);Bacteroidales(100);Porphyromonadaceae(100);Porphyromonadaceae_unclassified(100);
Otu1083	7	Bacteria(100);Firmicutes(100);Clostridia(100);Clostridiales(100);Lachnospiraceae(100);Lachnospiraceae_unclassified(100);
Otu1084	7	Bacteria(100);Firmicutes(100);Clostridia(100);Clostridiales(100);Lachnospiraceae(100);Lachnospiraceae_unclassified(100);
Otu1085	7	Bacteria(100);Firmicutes(100);Clostridia(100);Clostridiales(100);Lachnospiraceae(100);Lachnospiraceae_unclassified(100);
Otu1086	7	Bacteria(100);Firmicutes(100);Clostridia(100);Clostridiales(100);Lachnospiraceae(100);Lachnospiraceae_unclassified(72);
Otu1087	7	Bacteria(100);Actinobacteria(100);Actinobacteria(100);Actinomycetales(100);Nocardiaceae(100);Williamsia(100);
Otu1088	7	Bacteria(100);Firmicutes(100);Clostridia(100);Clostridiales(100);Clostridiaceae_1(100);Clostridium_sensu_stricto(100);
Otu1089	7	Bacteria(100);Firmicutes(100);Erysipelotrichia(72);Erysipelotrichales(72);Erysipelotrichaceae(72);Turicibacter(72);
Otu1090	7	Bacteria(100);Bacteroidetes(100);Bacteroidia(100);Bacteroidales(100);Porphyromonadaceae(100);Porphyromonadaceae_unclassified(100);
Otu1091	7	Bacteria(100);Proteobacteria(100);Gammaproteobacteria(100);Enterobacteriales(100);Enterobacteriaceae(100);Enterobacteriaceae_unclassified(100);
Otu1092	7	Bacteria(100);Firmicutes(100);Clostridia(86);Clostridiales(86);Clostridiales_unclassified(86);Clostridiales_unclassified(86);
Otu1093	7	Bacteria(100);Firmicutes(100);Clostridia(100);Clostridiales(100);Lachnospiraceae(100);Lachnospiraceae_unclassified(100);
Otu1094	7	Bacteria(100);Firmicutes(100);Clostridia(100);Clostridiales(100);Lachnospiraceae(100);Lachnospiraceae_unclassified(100);
Otu1095	7	Bacteria(100);Firmicutes(100);Clostridia(100);Clostridiales(100);Lachnospiraceae(100);Lachnospiraceae_unclassified(100);
Otu1096	7	Bacteria(100);Actinobacteria(100);Actinobacteria(100);Actinomycetales(100);Micromonosporaceae(100);Micromonospora(86);
Otu1097	7	Bacteria(100);Bacteroidetes(100);Bacteroidia(72);Bacteroidales(72);Bacteroidales_unclassified(72);Bacteroidales_unclassified(72);
Otu1098	7	Bacteria(100);Firmicutes(100);Clostridia(100);Clostridiales(100);Lachnospiraceae(100);Lachnospiraceae_unclassified(100);
Otu1099	7	Bacteria(100);Firmicutes(100);Bacilli(100);Bacillales(100);Planococcaceae(100);Ureibacillus(100);
Otu1100	7	Bacteria(100);Firmicutes(100);Clostridia(100);Clostridiales(100);Lachnospiraceae(100);Lachnospiraceae_unclassified(72);
Otu1101	7	Bacteria(100);Firmicutes(100);Clostridia(100);Clostridiales(100);Clostridiales_unclassified(100);Clostridiales_unclassified(100);
Otu1102	7	Bacteria(100);Firmicutes(100);Clostridia(100);Clostridiales(100);Lachnospiraceae(100);Lachnospiraceae_unclassified(100);
Otu1103	7	Bacteria(100);Bacteroidetes(100);Bacteroidia(100);Bacteroidales(100);Porphyromonadaceae(100);Porphyromonadaceae_unclassified(100);
Otu1104	7	Bacteria(100);Firmicutes(100);Clostridia(100);Clostridiales(100);Clostridiales_Incertae_Sedis_XIII(86);Clostridiales_Incertae_Sedis_XIII_unclassified(86);
Otu1105	7	Bacteria(100);Firmicutes(100);Clostridia(100);Clostridiales(100);Lachnospiraceae(100);Lachnospiraceae_unclassified(100);
Otu1106	7	Bacteria(100);Firmicutes(100);Clostridia(100);Clostridiales(100);Clostridiales_unclassified(100);Clostridiales_unclassified(100);
Otu1107	7	Bacteria(100);Firmicutes(100);Bacilli(100);Bacillales(100);Bacillaceae_1(58);Bacillaceae_1_unclassified(58);
Otu1108	7	Bacteria(100);Bacteroidetes(100);Bacteroidia(100);Bacteroidales(100);Porphyromonadaceae(100);Porphyromonas(100);
Otu1109	7	Bacteria(100);Firmicutes(100);Clostridia(100);Clostridiales(100);Lachnospiraceae(100);Lachnospiraceae_unclassified(100);
Otu1110	7	Bacteria(100);Proteobacteria(100);Gammaproteobacteria(100);Pasteurellales(100);Pasteurellaceae(100);Haemophilus(72);
Otu1111	7	Bacteria(100);Firmicutes(100);Bacilli(100);Bacilli_unclassified(58);Bacilli_unclassified(58);Bacilli_unclassified(58);
Otu1112	7	Bacteria(100);Firmicutes(100);Clostridia(100);Clostridiales(100);Ruminococcaceae(86);Ruminococcaceae_unclassified(86);
Otu1113	7	Bacteria(100);Proteobacteria(100);Proteobacteria_unclassified(100);Proteobacteria_unclassified(100);Proteobacteria_unclassified(100);Proteobacteria_unclassified(100);
Otu1114	7	Bacteria(100);Firmicutes(100);Bacilli(100);Lactobacillales(100);Lactobacillaceae(58);Lactobacillus(58);
Otu1115	7	Bacteria(100);Firmicutes(100);Clostridia(100);Clostridiales(100);Lachnospiraceae(100);Lachnospiraceae_unclassified(100);
Otu1116	7	Bacteria(100);Firmicutes(100);Clostridia(100);Clostridiales(100);Lachnospiraceae(100);Lachnospiraceae_unclassified(100);
Otu1117	7	Bacteria(100);Firmicutes(100);Clostridia(100);Clostridiales(100);Ruminococcaceae(100);Ruminococcaceae_unclassified(100);
Otu1118	7	Bacteria(100);Firmicutes(100);Clostridia(100);Clostridiales(100);Lachnospiraceae(86);Lachnospiraceae_unclassified(86);
Otu1119	7	Bacteria(100);Proteobacteria(100);Gammaproteobacteria(100);Enterobacteriales(100);Enterobacteriaceae(100);Enterobacteriaceae_unclassified(100);
Otu1120	7	Bacteria(100);Firmicutes(100);Clostridia(100);Clostridiales(100);Lachnospiraceae(100);Lachnospiraceae_unclassified(86);
Otu1121	7	Bacteria(100);Bacteroidetes(100);Bacteroidia(100);Bacteroidales(100);Porphyromonadaceae(58);Porphyromonadaceae_unclassified(58);
Otu1122	7	Bacteria(100);Firmicutes(100);Clostridia(100);Clostridiales(100);Lachnospiraceae(100);Lachnospiraceae_unclassified(100);
Otu1123	7	Bacteria(100);Firmicutes(100);Clostridia(100);Clostridiales(100);Peptostreptococcaceae(100);Romboutsia(86);
Otu1124	7	Bacteria(100);Proteobacteria(100);Gammaproteobacteria(100);Enterobacteriales(100);Enterobacteriaceae(100);Enterobacteriaceae_unclassified(100);
Otu1125	7	Bacteria(100);Bacteroidetes(100);Bacteroidia(100);Bacteroidales(100);Porphyromonadaceae(58);Porphyromonadaceae_unclassified(58);
Otu1126	7	Bacteria(100);Bacteroidetes(86);Bacteroidetes_unclassified(86);Bacteroidetes_unclassified(86);Bacteroidetes_unclassified(86);Bacteroidetes_unclassified(86);
Otu1127	7	Bacteria(100);Actinobacteria(100);Actinobacteria(100);Coriobacteriales(100);Coriobacteriaceae(100);Coriobacteriaceae_unclassified(100);
Otu1128	7	Bacteria(100);Firmicutes(100);Clostridia(100);Clostridiales(100);Clostridiales_unclassified(86);Clostridiales_unclassified(86);
Otu1129	7	Bacteria(100);Firmicutes(100);Clostridia(100);Clostridiales(100);Lachnospiraceae(100);Lachnospiraceae_unclassified(100);
Otu1130	7	Bacteria(100);Actinobacteria(100);Actinobacteria(100);Coriobacteriales(100);Coriobacteriaceae(100);Coriobacteriaceae_unclassified(100);
Otu1131	7	Bacteria(100);Firmicutes(100);Clostridia(100);Clostridiales(100);Ruminococcaceae(72);Ruminococcaceae_unclassified(72);
Otu1132	7	Bacteria(100);Firmicutes(100);Clostridia(100);Clostridiales(100);Lachnospiraceae(100);Lachnospiraceae_unclassified(100);
Otu1133	7	Bacteria(100);Firmicutes(100);Clostridia(100);Clostridiales(100);Lachnospiraceae(100);Lachnospiraceae_unclassified(100);
Otu1134	7	Bacteria(100);Firmicutes(100);Clostridia(100);Clostridiales(100);Lachnospiraceae(100);Lachnospiraceae_unclassified(100);
Otu1135	7	Bacteria(100);Firmicutes(100);Clostridia(100);Clostridiales(100);Lachnospiraceae(100);Lachnospiraceae_unclassified(100);
Otu1136	7	Bacteria(100);Firmicutes(100);Clostridia(100);Clostridiales(100);Lachnospiraceae(100);Lachnospiraceae_unclassified(100);
Otu1137	7	Bacteria(100);Bacteroidetes(100);Bacteroidia(100);Bacteroidales(100);Porphyromonadaceae(100);Porphyromonadaceae_unclassified(100);
Otu1138	7	Bacteria(100);Bacteroidetes(100);Bacteroidia(100);Bacteroidales(100);Porphyromonadaceae(100);Porphyromonadaceae_unclassified(100);
Otu1139	7	Bacteria(100);Firmicutes(100);Clostridia(100);Clostridiales(100);Lachnospiraceae(100);Lachnospiraceae_unclassified(100);
Otu1140	7	Bacteria(100);Firmicutes(100);Clostridia(100);Clostridiales(100);Lachnospiraceae(100);Lachnospiraceae_unclassified(100);
Otu1141	7	Bacteria(100);Firmicutes(100);Bacilli(100);Bacillales(100);Paenibacillaceae_1(100);Paenibacillus(100);
Otu1142	7	Bacteria(100);Bacteroidetes(100);Bacteroidia(72);Bacteroidales(72);Bacteroidales_unclassified(72);Bacteroidales_unclassified(72);
Otu1143	7	Bacteria(100);Firmicutes(100);Clostridia(100);Clostridiales(100);Lachnospiraceae(100);Lachnospiraceae_unclassified(100);
Otu1144	7	Bacteria(100);Actinobacteria(100);Actinobacteria(100);Actinomycetales(100);Brevibacteriaceae(100);Brevibacterium(100);
Otu1145	7	Bacteria(100);Firmicutes(100);Clostridia(100);Clostridiales(100);Lachnospiraceae(100);Lachnospiraceae_unclassified(100);
Otu1146	7	Bacteria(100);Firmicutes(100);Negativicutes(100);Selenomonadales(100);Veillonellaceae(100);Sporomusa(100);
Otu1147	7	Bacteria(100);Bacteroidetes(100);Bacteroidia(100);Bacteroidales(100);Porphyromonadaceae(72);Porphyromonadaceae_unclassified(72);
Otu1148	7	Bacteria(100);Firmicutes(100);Clostridia(100);Clostridiales(100);Lachnospiraceae(100);Lachnospiraceae_unclassified(100);
Otu1149	7	Bacteria(100);Bacteroidetes(100);Bacteroidia(100);Bacteroidales(100);Porphyromonadaceae(100);Porphyromonadaceae_unclassified(100);
Otu1150	7	Bacteria(100);Firmicutes(100);Bacilli(100);Bacillales(100);Listeriaceae(86);Listeria(86);
Otu1151	7	Bacteria(100);Firmicutes(100);Bacilli(100);Lactobacillales(100);Lactobacillaceae(100);Lactobacillus(100);
Otu1152	7	Bacteria(100);Firmicutes(100);Bacilli(100);Lactobacillales(100);Streptococcaceae(100);Streptococcus(100);
Otu1153	7	Bacteria(100);Firmicutes(100);Clostridia(100);Clostridiales(100);Lachnospiraceae(100);Lachnospiraceae_unclassified(100);
Otu1154	7	Bacteria(100);Chloroflexi(100);Chloroflexi_unclassified(100);Chloroflexi_unclassified(100);Chloroflexi_unclassified(100);Chloroflexi_unclassified(100);
Otu1155	6	Bacteria(100);Firmicutes(100);Bacilli(100);Bacillales(100);Paenibacillaceae_1(100);Paenibacillus(84);
Otu1156	6	Bacteria(100);Firmicutes(100);Clostridia(100);Clostridiales(100);Lachnospiraceae(100);Lachnospiraceae_unclassified(100);
Otu1157	6	Bacteria(100);Proteobacteria(100);Gammaproteobacteria(100);Enterobacteriales(100);Enterobacteriaceae(100);Enterobacteriaceae_unclassified(100);
Otu1158	6	Bacteria(100);Firmicutes(100);Clostridia(100);Clostridiales(100);Lachnospiraceae(100);Lachnospiraceae_unclassified(100);
Otu1159	6	Bacteria(100);Bacteroidetes(100);Bacteroidia(100);Bacteroidales(100);Porphyromonadaceae(100);Porphyromonadaceae_unclassified(100);
Otu1160	6	Bacteria(100);Bacteroidetes(100);Bacteroidia(100);Bacteroidales(100);Porphyromonadaceae(100);Porphyromonadaceae_unclassified(100);
Otu1161	6	Bacteria(100);Bacteroidetes(100);Bacteroidia(100);Bacteroidales(100);Bacteroidales_unclassified(100);Bacteroidales_unclassified(100);
Otu1162	6	Bacteria(100);Bacteroidetes(100);Bacteroidia(100);Bacteroidales(100);Porphyromonadaceae(100);Porphyromonadaceae_unclassified(100);
Otu1163	6	Bacteria(100);Bacteroidetes(100);Bacteroidia(100);Bacteroidales(100);Porphyromonadaceae(100);Porphyromonadaceae_unclassified(100);
Otu1164	6	Bacteria(100);Firmicutes(100);Clostridia(100);Clostridiales(100);Lachnospiraceae(100);Lachnospiraceae_unclassified(100);
Otu1165	6	Bacteria(100);Bacteroidetes(100);Bacteroidia(100);Bacteroidales(100);Porphyromonadaceae(100);Porphyromonadaceae_unclassified(100);
Otu1166	6	Bacteria(100);Firmicutes(100);Clostridia(100);Clostridiales(100);Lachnospiraceae(100);Lachnospiraceae_unclassified(100);
Otu1167	6	Bacteria(100);Actinobacteria(100);Actinobacteria(100);Actinobacteria_unclassified(100);Actinobacteria_unclassified(100);Actinobacteria_unclassified(100);
Otu1168	6	Bacteria(100);Acidobacteria(100);Acidobacteria_Gp4(100);Acidobacteria_Gp4_unclassified(100);Acidobacteria_Gp4_unclassified(100);Acidobacteria_Gp4_unclassified(100);
Otu1169	6	Bacteria(100);Firmicutes(100);Clostridia(100);Clostridiales(100);Lachnospiraceae(100);Lachnospiraceae_unclassified(84);
Otu1170	6	Bacteria(100);Firmicutes(100);Clostridia(100);Clostridiales(100);Lachnospiraceae(100);Lachnospiraceae_unclassified(100);
Otu1171	6	Bacteria(100);Firmicutes(100);Clostridia(100);Clostridiales(100);Lachnospiraceae(100);Lachnospiraceae_unclassified(100);
Otu1172	6	Bacteria(100);Firmicutes(100);Clostridia(100);Clostridiales(100);Clostridiales_unclassified(100);Clostridiales_unclassified(100);
Otu1173	6	Bacteria(100);Firmicutes(100);Clostridia(100);Clostridiales(100);Ruminococcaceae(100);Ruminococcus(100);
Otu1174	6	Bacteria(100);Firmicutes(100);Clostridia(100);Clostridiales(100);Lachnospiraceae(100);Lachnospiraceae_unclassified(100);
Otu1175	6	Bacteria(100);Proteobacteria(100);Alphaproteobacteria(100);Sphingomonadales(100);Sphingomonadaceae(100);Sphingomonadaceae_unclassified(100);
Otu1176	6	Bacteria(100);Firmicutes(100);Clostridia(100);Clostridiales(100);Ruminococcaceae(84);Ruminococcaceae_unclassified(84);
Otu1177	6	Bacteria(100);Firmicutes(100);Clostridia(100);Clostridiales(100);Lachnospiraceae(84);Lachnospiraceae_unclassified(84);
Otu1178	6	Bacteria(100);Firmicutes(100);Clostridia(100);Clostridiales(100);Lachnospiraceae(84);Lachnospiraceae_unclassified(84);
Otu1179	6	Bacteria(100);Firmicutes(100);Clostridia(100);Clostridiales(100);Lachnospiraceae(100);Lachnospiraceae_unclassified(100);
Otu1180	6	Bacteria(100);Bacteroidetes(100);Bacteroidetes_unclassified(100);Bacteroidetes_unclassified(100);Bacteroidetes_unclassified(100);Bacteroidetes_unclassified(100);
Otu1181	6	Bacteria(100);Firmicutes(100);Clostridia(100);Clostridiales(100);Lachnospiraceae(100);Lachnospiraceae_unclassified(100);
Otu1182	6	Bacteria(100);Firmicutes(100);Clostridia(100);Clostridiales(100);Clostridiales_unclassified(84);Clostridiales_unclassified(84);
Otu1183	6	Bacteria(100);Firmicutes(100);Clostridia(100);Clostridiales(100);Lachnospiraceae(100);Lachnospiraceae_unclassified(100);
Otu1184	6	Bacteria(100);Bacteroidetes(100);Bacteroidia(100);Bacteroidales(100);Porphyromonadaceae(100);Porphyromonadaceae_unclassified(100);
Otu1185	6	Bacteria(100);Firmicutes(100);Clostridia(100);Clostridiales(100);Lachnospiraceae(100);Lachnospiraceae_unclassified(100);
Otu1186	6	Bacteria(100);Firmicutes(100);Clostridia(100);Clostridiales(100);Lachnospiraceae(100);Lachnospiraceae_unclassified(84);
Otu1187	6	Bacteria(100);Firmicutes(100);Clostridia(100);Clostridiales(100);Lachnospiraceae(100);Lachnospiraceae_unclassified(100);
Otu1188	6	Bacteria(100);Bacteroidetes(100);Bacteroidia(100);Bacteroidales(100);Porphyromonadaceae(100);Porphyromonadaceae_unclassified(100);
Otu1189	6	Bacteria(100);Firmicutes(100);Clostridia(100);Clostridiales(100);Clostridiales_unclassified(84);Clostridiales_unclassified(84);
Otu1190	6	Bacteria(100);Firmicutes(100);Clostridia(100);Clostridiales(100);Lachnospiraceae(100);Lachnospiraceae_unclassified(100);
Otu1191	6	Bacteria(100);Firmicutes(100);Clostridia(100);Clostridiales(100);Lachnospiraceae(100);Lachnospiraceae_unclassified(100);
Otu1192	6	Bacteria(100);Firmicutes(100);Clostridia(100);Clostridiales(100);Lachnospiraceae(100);Lachnospiraceae_unclassified(67);
Otu1193	6	Bacteria(100);Firmicutes(100);Clostridia(100);Clostridiales(100);Lachnospiraceae(100);Lachnospiraceae_unclassified(84);
Otu1194	6	Bacteria(100);Bacteroidetes(100);Bacteroidia(100);Bacteroidales(100);Porphyromonadaceae(100);Porphyromonadaceae_unclassified(100);
Otu1195	6	Bacteria(100);Firmicutes(100);Clostridia(100);Clostridiales(100);Lachnospiraceae(100);Lachnospiraceae_unclassified(100);
Otu1196	6	Bacteria(100);Firmicutes(100);Clostridia(100);Clostridiales(100);Lachnospiraceae(100);Lachnospiraceae_unclassified(100);
Otu1197	6	Bacteria(100);Firmicutes(100);Clostridia(100);Clostridiales(100);Lachnospiraceae(100);Lachnospiraceae_unclassified(100);
Otu1198	6	Bacteria(100);Firmicutes(100);Clostridia(100);Clostridiales(100);Ruminococcaceae(100);Oscillibacter(84);
Otu1199	6	Bacteria(100);Firmicutes(100);Clostridia(100);Clostridiales(100);Clostridiales_unclassified(100);Clostridiales_unclassified(100);
Otu1200	6	Bacteria(100);Actinobacteria(100);Actinobacteria(100);Coriobacteriales(100);Coriobacteriaceae(100);Coriobacteriaceae_unclassified(100);
Otu1201	6	Bacteria(100);Firmicutes(100);Clostridia(100);Clostridiales(100);Lachnospiraceae(100);Lachnospiraceae_unclassified(100);
Otu1202	6	Bacteria(100);Firmicutes(100);Clostridia(100);Clostridiales(100);Clostridiaceae_1(100);Clostridium_sensu_stricto(100);
Otu1203	6	Bacteria(100);Bacteria_unclassified(100);Bacteria_unclassified(100);Bacteria_unclassified(100);Bacteria_unclassified(100);Bacteria_unclassified(100);
Otu1204	6	Bacteria(100);Bacteroidetes(100);Bacteroidia(100);Bacteroidales(100);Porphyromonadaceae(100);Porphyromonadaceae_unclassified(100);
Otu1205	6	Bacteria(100);Firmicutes(100);Clostridia(100);Clostridiales(100);Lachnospiraceae(100);Lachnospiraceae_unclassified(100);
Otu1206	6	Bacteria(100);Firmicutes(100);Clostridia(100);Clostridiales(100);Lachnospiraceae(100);Lachnospiraceae_unclassified(100);
Otu1207	6	Bacteria(100);Firmicutes(100);Clostridia(100);Clostridiales(100);Lachnospiraceae(100);Lachnospiraceae_unclassified(100);
Otu1208	6	Bacteria(100);Actinobacteria(100);Actinobacteria(100);Actinomycetales(100);Actinomycetales_unclassified(100);Actinomycetales_unclassified(100);
Otu1209	6	Bacteria(100);Firmicutes(100);Firmicutes_unclassified(100);Firmicutes_unclassified(100);Firmicutes_unclassified(100);Firmicutes_unclassified(100);
Otu1210	6	Bacteria(100);Firmicutes(100);Clostridia(100);Clostridiales(100);Lachnospiraceae(100);Lachnospiraceae_unclassified(100);
Otu1211	6	Bacteria(100);Firmicutes(100);Clostridia(100);Clostridiales(100);Lachnospiraceae(100);Lachnospiraceae_unclassified(100);
Otu1212	6	Bacteria(100);Firmicutes(100);Clostridia(100);Clostridiales(100);Lachnospiraceae(100);Lachnospiraceae_unclassified(84);
Otu1213	6	Bacteria(100);Firmicutes(100);Clostridia(100);Clostridiales(100);Ruminococcaceae(100);Butyricicoccus(100);
Otu1214	6	Bacteria(100);Firmicutes(100);Clostridia(100);Clostridiales(100);Lachnospiraceae(100);Lachnospiraceae_unclassified(100);
Otu1215	6	Bacteria(100);Firmicutes(100);Clostridia(100);Clostridiales(100);Lachnospiraceae(100);Lachnospiraceae_unclassified(100);
Otu1216	6	Bacteria(100);Firmicutes(100);Bacilli(100);Bacillales(100);Bacillaceae_2(100);Bacillaceae_2_unclassified(100);
Otu1217	6	Bacteria(100);Firmicutes(100);Clostridia(100);Clostridiales(100);Lachnospiraceae(100);Lachnospiraceae_unclassified(100);
Otu1218	6	Bacteria(100);Firmicutes(100);Clostridia(100);Clostridiales(100);Lachnospiraceae(100);Lachnospiraceae_unclassified(100);
Otu1219	6	Bacteria(100);Firmicutes(100);Clostridia(100);Clostridiales(100);Clostridiales_unclassified(100);Clostridiales_unclassified(100);
Otu1220	6	Bacteria(100);Firmicutes(100);Clostridia(100);Clostridiales(100);Clostridiales_unclassified(84);Clostridiales_unclassified(84);
Otu1221	6	Bacteria(100);Firmicutes(100);Clostridia(100);Clostridiales(100);Lachnospiraceae(100);Lachnospiraceae_unclassified(100);
Otu1222	6	Bacteria(100);Firmicutes(100);Clostridia(100);Clostridiales(100);Lachnospiraceae(84);Lachnospiraceae_unclassified(84);
Otu1223	6	Bacteria(100);Firmicutes(100);Clostridia(100);Clostridiales(100);Lachnospiraceae(100);Lachnospiraceae_unclassified(100);
Otu1224	6	Bacteria(100);Firmicutes(100);Bacilli(100);Lactobacillales(100);Enterococcaceae(100);Tetragenococcus(100);
Otu1225	6	Bacteria(100);Firmicutes(100);Clostridia(100);Clostridiales(100);Clostridiales_unclassified(100);Clostridiales_unclassified(100);
Otu1226	6	Bacteria(100);Firmicutes(100);Erysipelotrichia(100);Erysipelotrichales(100);Erysipelotrichaceae(100);Turicibacter(100);
Otu1227	6	Bacteria(100);Firmicutes(100);Clostridia(100);Clostridiales(100);Lachnospiraceae(100);Lachnospiraceae_unclassified(100);
Otu1228	6	Bacteria(100);Firmicutes(100);Clostridia(100);Clostridiales(100);Lachnospiraceae(100);Lachnospiraceae_unclassified(100);
Otu1229	6	Bacteria(100);Firmicutes(100);Clostridia(100);Clostridiales(100);Lachnospiraceae(100);Lachnospiraceae_unclassified(100);
Otu1230	6	Bacteria(100);Firmicutes(100);Clostridia(100);Clostridiales(100);Lachnospiraceae(100);Lachnospiraceae_unclassified(100);
Otu1231	6	Bacteria(100);Firmicutes(100);Clostridia(100);Clostridiales(100);Lachnospiraceae(100);Lachnospiraceae_unclassified(100);
Otu1232	6	Bacteria(100);Firmicutes(100);Clostridia(100);Clostridiales(100);Ruminococcaceae(100);Ruminococcus(100);
Otu1233	6	Bacteria(100);Bacteroidetes(100);Bacteroidia(100);Bacteroidales(100);Porphyromonadaceae(100);Porphyromonadaceae_unclassified(100);
Otu1234	6	Bacteria(100);Bacteroidetes(100);Bacteroidia(100);Bacteroidales(100);Porphyromonadaceae(100);Porphyromonadaceae_unclassified(100);
Otu1235	6	Bacteria(100);Firmicutes(100);Clostridia(100);Clostridiales(100);Lachnospiraceae(67);Lachnospiraceae_unclassified(67);
Otu1236	6	Bacteria(100);Firmicutes(100);Clostridia(100);Clostridiales(100);Lachnospiraceae(100);Lachnospiraceae_unclassified(67);
Otu1237	6	Bacteria(100);Firmicutes(100);Firmicutes_unclassified(100);Firmicutes_unclassified(100);Firmicutes_unclassified(100);Firmicutes_unclassified(100);
Otu1238	6	Bacteria(100);Firmicutes(100);Clostridia(100);Clostridiales(100);Lachnospiraceae(100);Lachnospiraceae_unclassified(100);
Otu1239	6	Bacteria(100);Firmicutes(100);Bacilli(100);Bacillales(100);Bacillaceae_2(100);Bacillaceae_2_unclassified(100);
Otu1240	6	Bacteria(100);Firmicutes(100);Firmicutes_unclassified(100);Firmicutes_unclassified(100);Firmicutes_unclassified(100);Firmicutes_unclassified(100);
Otu1241	6	Bacteria(100);Firmicutes(100);Clostridia(100);Clostridiales(100);Lachnospiraceae(100);Coprococcus(100);
Otu1242	6	Bacteria(100);Bacteroidetes(100);Bacteroidia(100);Bacteroidales(100);Porphyromonadaceae(100);Porphyromonadaceae_unclassified(100);
Otu1243	6	Bacteria(100);Bacteroidetes(100);Bacteroidia(100);Bacteroidales(100);Porphyromonadaceae(100);Porphyromonadaceae_unclassified(100);
Otu1244	6	Bacteria(100);Actinobacteria(100);Actinobacteria(100);Actinomycetales(100);Kineosporiaceae(100);Quadrisphaera(100);
Otu1245	6	Bacteria(100);Firmicutes(100);Clostridia(100);Clostridiales(100);Lachnospiraceae(100);Lachnospiraceae_unclassified(100);
Otu1246	6	Bacteria(100);Bacteroidetes(100);Bacteroidia(100);Bacteroidales(100);Porphyromonadaceae(100);Porphyromonadaceae_unclassified(100);
Otu1247	6	Bacteria(100);Bacteroidetes(100);Bacteroidia(100);Bacteroidales(100);Porphyromonadaceae(100);Porphyromonadaceae_unclassified(100);
Otu1248	6	Bacteria(100);Firmicutes(100);Bacilli(100);Bacillales(100);Bacillaceae_1(100);Bacillus(100);
Otu1249	6	Bacteria(100);Firmicutes(100);Clostridia(100);Clostridiales(100);Peptostreptococcaceae(100);Clostridium_XI(100);
Otu1250	6	Bacteria(100);Firmicutes(100);Bacilli(100);Bacillales(100);Bacillaceae_1(100);Anoxybacillus(100);
Otu1251	6	Bacteria(100);Bacteroidetes(100);Bacteroidia(100);Bacteroidales(100);Porphyromonadaceae(67);Porphyromonadaceae_unclassified(67);
Otu1252	6	Bacteria(100);Firmicutes(100);Clostridia(100);Clostridiales(100);Lachnospiraceae(100);Lachnospiraceae_unclassified(100);
Otu1253	6	Bacteria(100);Firmicutes(100);Clostridia(100);Clostridiales(100);Lachnospiraceae(100);Lachnospiraceae_unclassified(100);
Otu1254	6	Bacteria(100);Bacteria_unclassified(100);Bacteria_unclassified(100);Bacteria_unclassified(100);Bacteria_unclassified(100);Bacteria_unclassified(100);
Otu1255	6	Bacteria(100);Firmicutes(100);Clostridia(67);Clostridiales(67);Clostridiales_unclassified(67);Clostridiales_unclassified(67);
Otu1256	6	Bacteria(100);Firmicutes(100);Clostridia(100);Clostridiales(100);Clostridiales_Incertae_Sedis_XI(100);Sedimentibacter(100);
Otu1257	6	Bacteria(100);Firmicutes(100);Clostridia(100);Clostridiales(100);Clostridiaceae_1(100);Clostridium_sensu_stricto(100);
Otu1258	6	Bacteria(100);Firmicutes(100);Bacilli(100);Bacillales(100);Bacillales_unclassified(100);Bacillales_unclassified(100);
Otu1259	6	Bacteria(100);Firmicutes(100);Clostridia(100);Clostridiales(100);Clostridiaceae_1(100);Clostridium_sensu_stricto(100);
Otu1260	5	Bacteria(100);Firmicutes(100);Clostridia(100);Clostridiales(100);Clostridiales_unclassified(100);Clostridiales_unclassified(100);
Otu1261	5	Bacteria(100);Firmicutes(100);Clostridia(100);Clostridiales(100);Lachnospiraceae(100);Lachnospiraceae_unclassified(100);
Otu1262	5	Bacteria(100);Firmicutes(100);Clostridia(100);Clostridiales(100);Lachnospiraceae(100);Dorea(100);
Otu1263	5	Bacteria(100);Firmicutes(100);Clostridia(100);Clostridiales(100);Ruminococcaceae(100);Oscillibacter(100);
Otu1264	5	Bacteria(100);Firmicutes(100);Clostridia(100);Clostridiales(100);Lachnospiraceae(100);Lachnospiraceae_unclassified(100);
Otu1265	5	Bacteria(100);Bacteroidetes(100);Bacteroidia(100);Bacteroidales(100);Porphyromonadaceae(100);Porphyromonadaceae_unclassified(100);
Otu1266	5	Bacteria(100);Deinococcus-Thermus(100);Deinococci(100);Thermales(100);Thermaceae(100);Meiothermus(100);
Otu1267	5	Bacteria(100);Bacteroidetes(100);Bacteroidia(100);Bacteroidales(100);Porphyromonadaceae(100);Porphyromonadaceae_unclassified(100);
Otu1268	5	Bacteria(100);Proteobacteria(100);Deltaproteobacteria(100);Deltaproteobacteria_unclassified(100);Deltaproteobacteria_unclassified(100);Deltaproteobacteria_unclassified(100);
Otu1269	5	Bacteria(100);Firmicutes(100);Clostridia(100);Clostridiales(100);Lachnospiraceae(100);Lachnospiraceae_unclassified(100);
Otu1270	5	Bacteria(100);Proteobacteria(100);Gammaproteobacteria(100);Enterobacteriales(100);Enterobacteriaceae(100);Enterobacteriaceae_unclassified(100);
Otu1271	5	Bacteria(100);Firmicutes(100);Clostridia(100);Clostridiales(100);Lachnospiraceae(100);Dorea(61);
Otu1272	5	Bacteria(100);Firmicutes(100);Clostridia(100);Clostridiales(100);Lachnospiraceae(100);Lachnospiraceae_unclassified(100);
Otu1273	5	Bacteria(100);Firmicutes(100);Clostridia(100);Clostridiales(100);Lachnospiraceae(100);Dorea(100);
Otu1274	5	Bacteria(100);Firmicutes(100);Clostridia(100);Clostridiales(100);Ruminococcaceae(100);Ruminococcaceae_unclassified(80);
Otu1275	5	Bacteria(100);Firmicutes(100);Clostridia(100);Clostridiales(100);Lachnospiraceae(100);Lachnospiraceae_unclassified(100);
Otu1276	5	Bacteria(100);Bacteroidetes(100);Bacteroidia(100);Bacteroidales(100);Prevotellaceae(100);Prevotella(100);
Otu1277	5	Bacteria(100);Bacteria_unclassified(100);Bacteria_unclassified(100);Bacteria_unclassified(100);Bacteria_unclassified(100);Bacteria_unclassified(100);
Otu1278	5	Bacteria(100);Firmicutes(100);Clostridia(100);Clostridiales(100);Ruminococcaceae(100);Oscillibacter(80);
Otu1279	5	Bacteria(100);Bacteroidetes(100);Bacteroidia(100);Bacteroidales(100);Porphyromonadaceae(100);Porphyromonadaceae_unclassified(100);
Otu1280	5	Bacteria(100);Firmicutes(100);Clostridia(100);Clostridiales(100);Lachnospiraceae(80);Lachnospiraceae_unclassified(80);
Otu1281	5	Bacteria(100);Firmicutes(100);Bacilli(100);Bacillales(100);Bacillales_unclassified(100);Bacillales_unclassified(100);
Otu1282	5	Bacteria(100);Proteobacteria(100);Gammaproteobacteria(100);Enterobacteriales(100);Enterobacteriaceae(100);Enterobacteriaceae_unclassified(100);
Otu1283	5	Bacteria(100);Bacteroidetes(100);Bacteroidia(100);Bacteroidales(100);Porphyromonadaceae(100);Porphyromonadaceae_unclassified(100);
Otu1284	5	Bacteria(100);Firmicutes(100);Clostridia(100);Clostridiales(100);Clostridiales_Incertae_Sedis_XI(100);Sporanaerobacter(100);
Otu1285	5	Bacteria(100);Firmicutes(100);Clostridia(100);Clostridiales(100);Lachnospiraceae(100);Acetatifactor(80);
Otu1286	5	Bacteria(100);Bacteroidetes(100);Bacteroidia(100);Bacteroidales(100);Porphyromonadaceae(100);Porphyromonadaceae_unclassified(100);
Otu1287	5	Bacteria(100);Firmicutes(100);Clostridia(100);Clostridiales(100);Lachnospiraceae(100);Lachnospiraceae_unclassified(100);
Otu1288	5	Bacteria(100);Firmicutes(100);Clostridia(100);Clostridiales(100);Lachnospiraceae(100);Lachnospiraceae_unclassified(100);
Otu1289	5	Bacteria(100);Firmicutes(100);Clostridia(100);Clostridiales(100);Clostridiales_Incertae_Sedis_XI(100);Clostridiales_Incertae_Sedis_XI_unclassified(100);
Otu1290	5	Bacteria(100);Firmicutes(100);Clostridia(100);Clostridiales(100);Ruminococcaceae(100);Ruminococcaceae_unclassified(61);
Otu1291	5	Bacteria(100);Firmicutes(100);Clostridia(100);Clostridiales(100);Lachnospiraceae(100);Lachnospiraceae_unclassified(100);
Otu1292	5	Bacteria(100);Firmicutes(100);Clostridia(100);Clostridiales(100);Clostridiales_unclassified(80);Clostridiales_unclassified(80);
Otu1293	5	Bacteria(100);Firmicutes(100);Clostridia(100);Clostridiales(100);Clostridiales_unclassified(100);Clostridiales_unclassified(100);
Otu1294	5	Bacteria(100);Firmicutes(100);Clostridia(100);Clostridiales(100);Clostridiales_unclassified(80);Clostridiales_unclassified(80);
Otu1295	5	Bacteria(100);Tenericutes(100);Mollicutes(100);Anaeroplasmatales(100);Anaeroplasmataceae(100);Anaeroplasma(100);
Otu1296	5	Bacteria(100);Firmicutes(100);Clostridia(100);Clostridiales(100);Ruminococcaceae(61);Ruminococcaceae_unclassified(61);
Otu1297	5	Bacteria(100);Firmicutes(100);Clostridia(100);Clostridiales(100);Lachnospiraceae(100);Lachnospiraceae_unclassified(100);
Otu1298	5	Bacteria(100);Bacteroidetes(100);Bacteroidia(100);Bacteroidales(100);Porphyromonadaceae(100);Porphyromonadaceae_unclassified(100);
Otu1299	5	Bacteria(100);Firmicutes(100);Clostridia(100);Clostridiales(100);Lachnospiraceae(100);Lachnospiraceae_unclassified(100);
Otu1300	5	Bacteria(100);Proteobacteria(100);Gammaproteobacteria(100);Enterobacteriales(100);Enterobacteriaceae(100);Enterobacteriaceae_unclassified(100);
Otu1301	5	Bacteria(100);Firmicutes(100);Clostridia(80);Clostridiales(80);Clostridiales_unclassified(80);Clostridiales_unclassified(80);
Otu1302	5	Bacteria(100);Bacteroidetes(100);Bacteroidia(100);Bacteroidales(100);Porphyromonadaceae(100);Porphyromonadaceae_unclassified(100);
Otu1303	5	Bacteria(100);Firmicutes(100);Clostridia(100);Clostridiales(100);Clostridiaceae_1(100);Clostridium_sensu_stricto(100);
Otu1304	5	Bacteria(100);Firmicutes(80);Firmicutes_unclassified(61);Firmicutes_unclassified(61);Firmicutes_unclassified(61);Firmicutes_unclassified(61);
Otu1305	5	Bacteria(100);Firmicutes(100);Clostridia(100);Clostridiales(100);Lachnospiraceae(100);Lachnospiraceae_unclassified(100);
Otu1306	5	Bacteria(100);Firmicutes(100);Clostridia(100);Clostridiales(100);Lachnospiraceae(80);Lachnospiraceae_unclassified(80);
Otu1307	5	Bacteria(100);Firmicutes(100);Clostridia(100);Clostridiales(100);Lachnospiraceae(100);Lachnospiraceae_unclassified(100);
Otu1308	5	Bacteria(100);Firmicutes(100);Clostridia(100);Clostridiales(100);Lachnospiraceae(100);Lachnospiraceae_unclassified(100);
Otu1309	5	Bacteria(100);Firmicutes(100);Clostridia(100);Clostridiales(100);Lachnospiraceae(100);Lachnospiraceae_unclassified(100);
Otu1310	5	Bacteria(100);Firmicutes(100);Bacilli(100);Bacillales(100);Paenibacillaceae_2(100);Aneurinibacillus(100);
Otu1311	5	Bacteria(100);Firmicutes(100);Erysipelotrichia(100);Erysipelotrichales(100);Erysipelotrichaceae(100);Turicibacter(100);
Otu1312	5	Bacteria(100);Firmicutes(100);Clostridia(100);Clostridiales(100);Lachnospiraceae(100);Lachnospiraceae_unclassified(100);
Otu1313	5	Bacteria(100);Firmicutes(100);Clostridia(100);Clostridiales(100);Lachnospiraceae(100);Lachnospiraceae_unclassified(100);
Otu1314	5	Bacteria(100);Firmicutes(100);Clostridia(100);Clostridiales(100);Lachnospiraceae(100);Lachnospiraceae_unclassified(100);
Otu1315	5	Bacteria(100);Firmicutes(100);Clostridia(100);Clostridiales(100);Ruminococcaceae(100);Ruminococcaceae_unclassified(100);
Otu1316	5	Bacteria(100);Bacteroidetes(100);Bacteroidia(100);Bacteroidales(100);Porphyromonadaceae(100);Porphyromonadaceae_unclassified(100);
Otu1317	5	Bacteria(100);Firmicutes(100);Clostridia(100);Clostridiales(100);Lachnospiraceae(100);Lachnospiraceae_unclassified(100);
Otu1318	5	Bacteria(100);Proteobacteria(100);Gammaproteobacteria(100);Enterobacteriales(100);Enterobacteriaceae(100);Enterobacteriaceae_unclassified(100);
Otu1319	5	Bacteria(100);Firmicutes(100);Clostridia(100);Clostridiales(100);Lachnospiraceae(100);Lachnospiraceae_unclassified(100);
Otu1320	5	Bacteria(100);Actinobacteria(100);Actinobacteria(100);Actinomycetales(100);Dietziaceae(100);Dietzia(100);
Otu1321	5	Bacteria(100);Firmicutes(100);Clostridia(100);Clostridiales(100);Lachnospiraceae(100);Lachnospiraceae_unclassified(100);
Otu1322	5	Bacteria(100);Bacteroidetes(100);Bacteroidia(100);Bacteroidales(100);Porphyromonadaceae(100);Porphyromonadaceae_unclassified(100);
Otu1323	5	Bacteria(100);Firmicutes(100);Erysipelotrichia(100);Erysipelotrichales(100);Erysipelotrichaceae(100);Turicibacter(100);
Otu1324	5	Bacteria(100);Firmicutes(100);Clostridia(100);Clostridiales(100);Ruminococcaceae(100);Ruminococcaceae_unclassified(80);
Otu1325	5	Bacteria(100);Firmicutes(100);Clostridia(100);Clostridiales(100);Lachnospiraceae(100);Lachnospiraceae_unclassified(100);
Otu1326	5	Bacteria(100);Firmicutes(100);Clostridia(100);Clostridiales(100);Lachnospiraceae(100);Lachnospiraceae_unclassified(100);
Otu1327	5	Bacteria(100);Bacteroidetes(100);Bacteroidia(100);Bacteroidales(100);Porphyromonadaceae(100);Porphyromonadaceae_unclassified(100);
Otu1328	5	Bacteria(100);Bacteroidetes(100);Bacteroidia(100);Bacteroidales(100);Porphyromonadaceae(100);Porphyromonadaceae_unclassified(100);
Otu1329	5	Bacteria(100);Firmicutes(100);Clostridia(100);Clostridiales(100);Clostridiales_unclassified(100);Clostridiales_unclassified(100);
Otu1330	5	Bacteria(100);Firmicutes(100);Clostridia(100);Clostridiales(100);Lachnospiraceae(100);Lachnospiraceae_unclassified(100);
Otu1331	5	Bacteria(100);Firmicutes(100);Clostridia(100);Clostridiales(100);Lachnospiraceae(100);Lachnospiraceae_unclassified(80);
Otu1332	5	Bacteria(100);Firmicutes(100);Clostridia(100);Clostridiales(100);Clostridiaceae_1(100);Clostridiaceae_1_unclassified(100);
Otu1333	5	Bacteria(100);Firmicutes(100);Clostridia(100);Clostridiales(100);Clostridiales_unclassified(100);Clostridiales_unclassified(100);
Otu1334	5	Bacteria(100);Bacteroidetes(100);Bacteroidia(100);Bacteroidales(100);Porphyromonadaceae(100);Porphyromonadaceae_unclassified(100);
Otu1335	5	Bacteria(100);Firmicutes(100);Clostridia(100);Clostridiales(100);Lachnospiraceae(100);Lachnospiraceae_unclassified(100);
Otu1336	5	Bacteria(100);Firmicutes(100);Clostridia(100);Clostridiales(100);Lachnospiraceae(100);Lachnospiraceae_unclassified(100);
Otu1337	5	Bacteria(100);Firmicutes(100);Clostridia(100);Clostridiales(100);Lachnospiraceae(100);Acetatifactor(100);
Otu1338	5	Bacteria(100);Firmicutes(100);Clostridia(100);Clostridiales(100);Lachnospiraceae(100);Lachnospiraceae_unclassified(100);
Otu1339	5	Bacteria(100);Firmicutes(100);Clostridia(100);Clostridiales(100);Lachnospiraceae(100);Clostridium_XlVa(61);
Otu1340	5	Bacteria(100);Firmicutes(100);Clostridia(100);Clostridiales(100);Ruminococcaceae(100);Ruminococcaceae_unclassified(100);
Otu1341	5	Bacteria(100);Bacteroidetes(100);Bacteroidia(80);Bacteroidales(80);Porphyromonadaceae(80);Porphyromonadaceae_unclassified(80);
Otu1342	5	Bacteria(100);Bacteroidetes(100);Bacteroidia(100);Bacteroidales(100);Porphyromonadaceae(100);Porphyromonadaceae_unclassified(100);
Otu1343	5	Bacteria(100);Firmicutes(100);Clostridia(100);Clostridiales(100);Lachnospiraceae(100);Lachnospiraceae_unclassified(100);
Otu1344	5	Bacteria(100);Bacteroidetes(100);Bacteroidia(100);Bacteroidales(100);Bacteroidaceae(100);Bacteroides(100);
Otu1345	5	Bacteria(100);Firmicutes(100);Erysipelotrichia(100);Erysipelotrichales(100);Erysipelotrichaceae(100);Erysipelotrichaceae_unclassified(100);
Otu1346	5	Bacteria(100);Firmicutes(100);Firmicutes_unclassified(61);Firmicutes_unclassified(61);Firmicutes_unclassified(61);Firmicutes_unclassified(61);
Otu1347	5	Bacteria(100);Firmicutes(80);Clostridia(80);Clostridiales(80);Lachnospiraceae(80);Lachnospiraceae_unclassified(80);
Otu1348	5	Bacteria(100);Firmicutes(100);Bacilli(100);Lactobacillales(100);Lactobacillaceae(100);Lactobacillus(100);
Otu1349	5	Bacteria(100);Firmicutes(100);Bacilli(100);Bacillales(100);Bacillales_unclassified(100);Bacillales_unclassified(100);
Otu1350	5	Bacteria(100);Firmicutes(100);Clostridia(100);Clostridiales(100);Lachnospiraceae(100);Acetatifactor(100);
Otu1351	5	Bacteria(100);Bacteroidetes(100);Bacteroidia(100);Bacteroidales(100);Porphyromonadaceae(80);Porphyromonadaceae_unclassified(80);
Otu1352	5	Bacteria(100);Bacteroidetes(100);Bacteroidia(100);Bacteroidales(100);Porphyromonadaceae(100);Porphyromonadaceae_unclassified(100);
Otu1353	5	Bacteria(100);Proteobacteria(100);Gammaproteobacteria(100);Enterobacteriales(100);Enterobacteriaceae(100);Enterobacteriaceae_unclassified(100);
Otu1354	5	Bacteria(100);Firmicutes(100);Clostridia(100);Clostridiales(100);Lachnospiraceae(100);Lachnospiraceae_unclassified(100);
Otu1355	5	Bacteria(100);Firmicutes(100);Clostridia(100);Clostridiales(100);Lachnospiraceae(100);Lachnospiraceae_unclassified(100);
Otu1356	5	Bacteria(100);Bacteroidetes(100);Bacteroidia(100);Bacteroidales(100);Porphyromonadaceae(100);Porphyromonadaceae_unclassified(100);
Otu1357	5	Bacteria(100);Firmicutes(100);Clostridia(100);Clostridiales(100);Lachnospiraceae(100);Lachnospiraceae_unclassified(100);
Otu1358	5	Bacteria(100);Firmicutes(100);Bacilli(100);Lactobacillales(100);Leuconostocaceae(100);Weissella(100);
Otu1359	5	Bacteria(100);Firmicutes(100);Clostridia(100);Clostridiales(100);Clostridiales_unclassified(61);Clostridiales_unclassified(61);
Otu1360	5	Bacteria(100);Firmicutes(100);Clostridia(100);Clostridiales(100);Clostridiales_unclassified(100);Clostridiales_unclassified(100);
Otu1361	5	Bacteria(100);Firmicutes(100);Firmicutes_unclassified(80);Firmicutes_unclassified(80);Firmicutes_unclassified(80);Firmicutes_unclassified(80);
Otu1362	5	Bacteria(100);Firmicutes(100);Clostridia(100);Clostridiales(100);Lachnospiraceae(100);Lachnospiraceae_unclassified(100);
Otu1363	5	Bacteria(100);Firmicutes(100);Clostridia(100);Clostridiales(100);Peptostreptococcaceae(100);Peptostreptococcus(100);
Otu1364	5	Bacteria(100);Firmicutes(100);Clostridia(100);Clostridiales(100);Ruminococcaceae(100);Oscillibacter(100);
Otu1365	5	Bacteria(100);Firmicutes(100);Clostridia(100);Clostridiales(100);Lachnospiraceae(100);Lachnospiraceae_unclassified(100);
Otu1366	5	Bacteria(100);Firmicutes(100);Clostridia(100);Clostridiales(100);Lachnospiraceae(61);Lachnospiraceae_unclassified(61);
Otu1367	5	Bacteria(100);Firmicutes(100);Clostridia(100);Clostridiales(100);Ruminococcaceae(80);Ruminococcaceae_unclassified(80);
Otu1368	5	Bacteria(100);Bacteria_unclassified(100);Bacteria_unclassified(100);Bacteria_unclassified(100);Bacteria_unclassified(100);Bacteria_unclassified(100);
Otu1369	5	Bacteria(100);Firmicutes(100);Clostridia(100);Clostridiales(100);Lachnospiraceae(100);Lachnospiraceae_unclassified(80);
Otu1370	5	Bacteria(100);Firmicutes(100);Clostridia(100);Clostridiales(100);Lachnospiraceae(100);Lachnospiraceae_unclassified(100);
Otu1371	5	Bacteria(100);Firmicutes(100);Clostridia(100);Clostridiales(100);Lachnospiraceae(100);Lachnospiraceae_unclassified(100);
Otu1372	5	Bacteria(100);Firmicutes(61);Firmicutes_unclassified(61);Firmicutes_unclassified(61);Firmicutes_unclassified(61);Firmicutes_unclassified(61);
Otu1373	5	Bacteria(100);Firmicutes(100);Clostridia(100);Clostridiales(100);Lachnospiraceae(100);Lachnospiraceae_unclassified(100);
Otu1374	5	Bacteria(100);Firmicutes(100);Clostridia(100);Clostridiales(100);Lachnospiraceae(100);Lachnospiraceae_unclassified(100);
Otu1375	5	Bacteria(100);Firmicutes(100);Firmicutes_unclassified(61);Firmicutes_unclassified(61);Firmicutes_unclassified(61);Firmicutes_unclassified(61);
Otu1376	5	Bacteria(100);Firmicutes(100);Bacilli(100);Bacillales(100);Paenibacillaceae_1(100);Paenibacillus(100);
Otu1377	5	Bacteria(100);Firmicutes(100);Clostridia(100);Clostridiales(100);Lachnospiraceae(100);Lachnospiraceae_unclassified(100);
Otu1378	5	Bacteria(100);Firmicutes(100);Clostridia(100);Clostridiales(100);Lachnospiraceae(80);Lachnospiraceae_unclassified(80);
Otu1379	5	Bacteria(100);Firmicutes(100);Clostridia(100);Clostridiales(100);Lachnospiraceae(100);Lachnospiraceae_unclassified(100);
Otu1380	5	Bacteria(100);Firmicutes(100);Clostridia(100);Clostridiales(100);Lachnospiraceae(100);Lachnospiraceae_unclassified(100);
Otu1381	5	Bacteria(100);Firmicutes(100);Clostridia(100);Clostridiales(100);Clostridiaceae_1(100);Clostridium_sensu_stricto(100);
Otu1382	5	Bacteria(100);Firmicutes(100);Clostridia(100);Clostridiales(100);Lachnospiraceae(100);Lachnospiraceae_unclassified(100);
Otu1383	5	Bacteria(100);Firmicutes(100);Clostridia(100);Clostridiales(100);Peptostreptococcaceae(100);Terrisporobacter(100);
Otu1384	5	Bacteria(100);Firmicutes(100);Clostridia(100);Clostridiales(100);Ruminococcaceae(100);Ruminococcaceae_unclassified(100);
Otu1385	5	Bacteria(100);Firmicutes(100);Clostridia(100);Clostridiales(100);Lachnospiraceae(100);Lachnospiraceae_unclassified(100);
Otu1386	5	Bacteria(100);Firmicutes(100);Clostridia(100);Clostridiales(100);Lachnospiraceae(100);Lachnospiraceae_unclassified(100);
Otu1387	5	Bacteria(100);Firmicutes(100);Clostridia(100);Clostridiales(100);Lachnospiraceae(100);Lachnospiraceae_unclassified(100);
Otu1388	5	Bacteria(100);Firmicutes(100);Clostridia(100);Clostridiales(100);Clostridiaceae_1(80);Clostridium_sensu_stricto(61);
Otu1389	5	Bacteria(100);Firmicutes(100);Clostridia(100);Clostridiales(100);Clostridiales_unclassified(100);Clostridiales_unclassified(100);
Otu1390	5	Bacteria(100);Bacteroidetes(100);Bacteroidia(100);Bacteroidales(100);Porphyromonadaceae(100);Porphyromonadaceae_unclassified(100);
Otu1391	5	Bacteria(100);Firmicutes(100);Clostridia(100);Clostridiales(100);Ruminococcaceae(100);Pseudoflavonifractor(80);
Otu1392	5	Bacteria(100);Firmicutes(100);Clostridia(100);Clostridiales(100);Clostridiales_unclassified(100);Clostridiales_unclassified(100);
Otu1393	5	Bacteria(100);Firmicutes(100);Clostridia(100);Clostridiales(100);Lachnospiraceae(100);Lachnospiraceae_unclassified(100);
Otu1394	5	Bacteria(100);Firmicutes(100);Clostridia(100);Clostridiales(100);Lachnospiraceae(80);Lachnospiraceae_unclassified(80);
Otu1395	5	Bacteria(100);Firmicutes(100);Clostridia(100);Clostridiales(100);Lachnospiraceae(100);Lachnospiraceae_unclassified(100);
Otu1396	5	Bacteria(100);Bacteroidetes(100);Bacteroidia(100);Bacteroidales(100);Porphyromonadaceae(100);Porphyromonadaceae_unclassified(100);
Otu1397	5	Bacteria(100);Bacteroidetes(100);Bacteroidia(100);Bacteroidales(100);Porphyromonadaceae(100);Porphyromonadaceae_unclassified(100);
Otu1398	5	Bacteria(100);Firmicutes(100);Clostridia(100);Clostridiales(100);Lachnospiraceae(100);Lachnospiraceae_unclassified(100);
Otu1399	5	Bacteria(100);Firmicutes(100);Clostridia(100);Clostridiales(100);Lachnospiraceae(100);Lachnospiraceae_unclassified(61);
Otu1400	5	Bacteria(100);Actinobacteria(100);Actinobacteria(100);Actinomycetales(100);Actinomycetales_unclassified(100);Actinomycetales_unclassified(100);
Otu1401	5	Bacteria(100);Firmicutes(100);Clostridia(100);Clostridiales(100);Lachnospiraceae(100);Lachnospiraceae_unclassified(100);
Otu1402	5	Bacteria(100);Firmicutes(100);Clostridia(100);Clostridiales(100);Lachnospiraceae(100);Lachnospiraceae_unclassified(100);
Otu1403	5	Bacteria(100);Firmicutes(100);Clostridia(100);Clostridiales(100);Lachnospiraceae(100);Lachnospiraceae_unclassified(61);
Otu1404	5	Bacteria(100);Firmicutes(100);Clostridia(100);Clostridiales(100);Ruminococcaceae(100);Oscillibacter(61);
Otu1405	5	Bacteria(100);Firmicutes(100);Clostridia(100);Clostridiales(100);Clostridiaceae_1(100);Clostridium_sensu_stricto(100);
Otu1406	5	Bacteria(100);Firmicutes(100);Clostridia(100);Clostridiales(100);Lachnospiraceae(100);Lachnospiraceae_unclassified(100);
Otu1407	5	Bacteria(100);Firmicutes(100);Erysipelotrichia(80);Erysipelotrichales(80);Erysipelotrichaceae(80);Turicibacter(80);
Otu1408	5	Bacteria(100);Bacteroidetes(100);Bacteroidia(100);Bacteroidales(100);Porphyromonadaceae(80);Porphyromonadaceae_unclassified(80);
Otu1409	5	Bacteria(100);Firmicutes(100);Clostridia(100);Clostridiales(100);Clostridiales_unclassified(100);Clostridiales_unclassified(100);
Otu1410	5	Bacteria(100);Firmicutes(100);Clostridia(100);Clostridiales(100);Clostridiaceae_1(100);Clostridium_sensu_stricto(100);
Otu1411	5	Bacteria(100);Firmicutes(100);Clostridia(100);Clostridiales(100);Ruminococcaceae(100);Ruminococcaceae_unclassified(100);
Otu1412	5	Bacteria(100);Firmicutes(100);Clostridia(100);Clostridiales(100);Lachnospiraceae(100);Lachnospiraceae_unclassified(100);
Otu1413	5	Bacteria(100);Firmicutes(100);Clostridia(100);Clostridiales(100);Ruminococcaceae(100);Ruminococcaceae_unclassified(100);
Otu1414	5	Bacteria(100);Firmicutes(100);Clostridia(100);Clostridiales(100);Lachnospiraceae(100);Lachnospiraceae_unclassified(100);
Otu1415	5	Bacteria(100);Firmicutes(100);Clostridia(100);Clostridiales(100);Lachnospiraceae(100);Lachnospiraceae_unclassified(100);
Otu1416	5	Bacteria(100);Firmicutes(100);Clostridia(100);Clostridiales(100);Lachnospiraceae(100);Lachnospiraceae_unclassified(100);
Otu1417	5	Bacteria(100);Firmicutes(100);Clostridia(100);Clostridiales(100);Lachnospiraceae(100);Acetatifactor(80);
Otu1418	5	Bacteria(100);Firmicutes(100);Clostridia(100);Clostridiales(100);Lachnospiraceae(100);Lachnospiraceae_unclassified(100);
Otu1419	5	Bacteria(100);Firmicutes(100);Clostridia(100);Clostridiales(100);Lachnospiraceae(100);Lachnospiraceae_unclassified(100);
Otu1420	5	Bacteria(100);Bacteroidetes(100);Bacteroidia(100);Bacteroidales(100);Porphyromonadaceae(100);Porphyromonadaceae_unclassified(100);
Otu1421	5	Bacteria(100);Firmicutes(100);Bacilli(100);Lactobacillales(100);Lactobacillaceae(61);Lactobacillaceae_unclassified(61);
Otu1422	5	Bacteria(100);Actinobacteria(100);Actinobacteria(100);Actinomycetales(100);Actinomycetales_unclassified(100);Actinomycetales_unclassified(100);
Otu1423	4	Bacteria(100);Firmicutes(100);Clostridia(100);Clostridiales(100);Lachnospiraceae(100);Lachnospiraceae_unclassified(100);
Otu1424	4	Bacteria(100);Bacteroidetes(100);Bacteroidia(100);Bacteroidales(100);Porphyromonadaceae(100);Porphyromonadaceae_unclassified(100);
Otu1425	4	Bacteria(100);Firmicutes(100);Clostridia(100);Clostridiales(100);Clostridiaceae_1(100);Clostridium_sensu_stricto(100);
Otu1426	4	Bacteria(100);Firmicutes(100);Clostridia(100);Clostridiales(100);Lachnospiraceae(100);Lachnospiraceae_unclassified(100);
Otu1427	4	Bacteria(100);Firmicutes(100);Firmicutes_unclassified(100);Firmicutes_unclassified(100);Firmicutes_unclassified(100);Firmicutes_unclassified(100);
Otu1428	4	Bacteria(100);Firmicutes(100);Clostridia(100);Clostridiales(100);Ruminococcaceae(100);Ruminococcaceae_unclassified(100);
Otu1429	4	Bacteria(100);Firmicutes(100);Clostridia(100);Clostridiales(100);Lachnospiraceae(100);Lachnospiraceae_unclassified(100);
Otu1430	4	Bacteria(100);Firmicutes(100);Clostridia(100);Clostridiales(100);Lachnospiraceae(100);Lachnospiraceae_unclassified(100);
Otu1431	4	Bacteria(100);Fusobacteria(100);Fusobacteriia(100);Fusobacteriales(100);Fusobacteriaceae(100);Fusobacteriaceae_unclassified(75);
Otu1432	4	Bacteria(100);Firmicutes(100);Clostridia(100);Clostridiales(100);Clostridiales_unclassified(100);Clostridiales_unclassified(100);
Otu1433	4	Bacteria(100);Firmicutes(100);Clostridia(100);Clostridiales(100);Lachnospiraceae(100);Acetatifactor(100);
Otu1434	4	Bacteria(100);Firmicutes(100);Clostridia(100);Clostridiales(100);Lachnospiraceae(100);Lachnospiraceae_unclassified(100);
Otu1435	4	Bacteria(100);Bacteroidetes(100);Bacteroidia(100);Bacteroidales(100);Porphyromonadaceae(100);Porphyromonadaceae_unclassified(100);
Otu1436	4	Bacteria(100);Firmicutes(100);Clostridia(100);Clostridiales(100);Ruminococcaceae(100);Ruminococcaceae_unclassified(100);
Otu1437	4	Bacteria(100);Bacteroidetes(100);Bacteroidia(100);Bacteroidales(100);Porphyromonadaceae(100);Porphyromonadaceae_unclassified(100);
Otu1438	4	Bacteria(100);Firmicutes(100);Clostridia(100);Clostridiales(100);Lachnospiraceae(100);Lachnospiraceae_unclassified(100);
Otu1439	4	Bacteria(100);Firmicutes(100);Clostridia(100);Clostridiales(100);Lachnospiraceae(100);Lachnospiraceae_unclassified(100);
Otu1440	4	Bacteria(100);Firmicutes(100);Clostridia(100);Clostridiales(100);Lachnospiraceae(100);Lachnospiraceae_unclassified(100);
Otu1441	4	Bacteria(100);Bacteroidetes(100);Bacteroidia(100);Bacteroidales(100);Porphyromonadaceae(100);Porphyromonadaceae_unclassified(100);
Otu1442	4	Bacteria(100);Proteobacteria(100);Gammaproteobacteria(100);Enterobacteriales(100);Enterobacteriaceae(100);Enterobacteriaceae_unclassified(100);
Otu1443	4	Bacteria(100);Firmicutes(100);Clostridia(100);Clostridiales(100);Ruminococcaceae(100);Pseudoflavonifractor(75);
Otu1444	4	Bacteria(100);Firmicutes(100);Clostridia(100);Clostridiales(100);Lachnospiraceae(100);Lachnospiraceae_unclassified(100);
Otu1445	4	Bacteria(100);Firmicutes(100);Clostridia(100);Clostridiales(100);Ruminococcaceae(100);Ruminococcaceae_unclassified(100);
Otu1446	4	Bacteria(100);Firmicutes(100);Clostridia(100);Clostridiales(100);Lachnospiraceae(100);Acetatifactor(100);
Otu1447	4	Bacteria(100);Firmicutes(100);Clostridia(100);Clostridiales(100);Lachnospiraceae(100);Lachnospiraceae_unclassified(100);
Otu1448	4	Bacteria(100);Bacteroidetes(100);Bacteroidia(100);Bacteroidales(100);Porphyromonadaceae(100);Porphyromonadaceae_unclassified(100);
Otu1449	4	Bacteria(100);Firmicutes(100);Clostridia(100);Clostridiales(100);Lachnospiraceae(100);Blautia(100);
Otu1450	4	Bacteria(100);Bacteroidetes(100);Bacteroidia(100);Bacteroidales(100);Porphyromonadaceae(75);Porphyromonadaceae_unclassified(75);
Otu1451	4	Bacteria(100);Bacteroidetes(100);Bacteroidia(100);Bacteroidales(100);Bacteroidales_unclassified(100);Bacteroidales_unclassified(100);
Otu1452	4	Bacteria(100);Firmicutes(100);Clostridia(100);Clostridiales(100);Lachnospiraceae(100);Lachnospiraceae_unclassified(100);
Otu1453	4	Bacteria(100);Bacteroidetes(100);Bacteroidia(100);Bacteroidales(100);Porphyromonadaceae(100);Porphyromonadaceae_unclassified(100);
Otu1454	4	Bacteria(100);Firmicutes(100);Bacilli(100);Bacilli_unclassified(100);Bacilli_unclassified(100);Bacilli_unclassified(100);
Otu1455	4	Bacteria(100);Firmicutes(100);Clostridia(75);Clostridiales(75);Clostridiales_unclassified(75);Clostridiales_unclassified(75);
Otu1456	4	Bacteria(100);Firmicutes(100);Clostridia(100);Clostridiales(100);Ruminococcaceae(100);Ruminococcaceae_unclassified(100);
Otu1457	4	Bacteria(100);Firmicutes(100);Clostridia(100);Clostridiales(100);Clostridiales_Incertae_Sedis_XI(100);Anaerococcus(100);
Otu1458	4	Bacteria(100);Bacteroidetes(100);Bacteroidia(100);Bacteroidales(100);Porphyromonadaceae(100);Porphyromonadaceae_unclassified(100);
Otu1459	4	Bacteria(100);Firmicutes(100);Clostridia(100);Clostridiales(100);Lachnospiraceae(100);Lachnospiraceae_unclassified(100);
Otu1460	4	Bacteria(100);Bacteroidetes(100);Bacteroidia(100);Bacteroidales(100);Porphyromonadaceae(100);Porphyromonadaceae_unclassified(100);
Otu1461	4	Bacteria(100);Firmicutes(100);Clostridia(100);Clostridiales(100);Clostridiaceae_1(100);Clostridium_sensu_stricto(100);
Otu1462	4	Bacteria(100);Firmicutes(100);Erysipelotrichia(100);Erysipelotrichales(100);Erysipelotrichaceae(100);Holdemanella(100);
Otu1463	4	Bacteria(100);Firmicutes(100);Clostridia(100);Clostridiales(100);Lachnospiraceae(100);Lachnospiraceae_unclassified(100);
Otu1464	4	Bacteria(100);Firmicutes(100);Clostridia(100);Clostridiales(100);Lachnospiraceae(100);Lachnospiraceae_unclassified(100);
Otu1465	4	Bacteria(100);Proteobacteria(100);Alphaproteobacteria(100);Rhizobiales(100);Phyllobacteriaceae(100);Mesorhizobium(100);
Otu1466	4	Bacteria(100);Firmicutes(100);Erysipelotrichia(100);Erysipelotrichales(100);Erysipelotrichaceae(100);Turicibacter(100);
Otu1467	4	Bacteria(100);Proteobacteria(100);Gammaproteobacteria(100);Enterobacteriales(100);Enterobacteriaceae(100);Enterobacteriaceae_unclassified(100);
Otu1468	4	Bacteria(100);Actinobacteria(100);Actinobacteria(100);Coriobacteriales(100);Coriobacteriaceae(100);Coriobacteriaceae_unclassified(100);
Otu1469	4	Bacteria(100);Firmicutes(100);Firmicutes_unclassified(100);Firmicutes_unclassified(100);Firmicutes_unclassified(100);Firmicutes_unclassified(100);
Otu1470	4	Bacteria(100);Firmicutes(100);Clostridia(100);Clostridiales(100);Lachnospiraceae(100);Acetatifactor(100);
Otu1471	4	Bacteria(100);Firmicutes(100);Clostridia(100);Clostridiales(100);Clostridiales_unclassified(100);Clostridiales_unclassified(100);
Otu1472	4	Bacteria(100);Firmicutes(100);Clostridia(100);Clostridiales(100);Ruminococcaceae(75);Ruminococcaceae_unclassified(75);
Otu1473	4	Bacteria(100);Firmicutes(100);Clostridia(100);Clostridiales(100);Clostridiales_unclassified(100);Clostridiales_unclassified(100);
Otu1474	4	Bacteria(100);Bacteroidetes(100);Bacteroidia(100);Bacteroidales(100);Porphyromonadaceae(100);Porphyromonadaceae_unclassified(100);
Otu1475	4	Bacteria(100);Actinobacteria(100);Actinobacteria(100);Gaiellales(100);Gaiellaceae(100);Gaiella(100);
Otu1476	4	Bacteria(100);Firmicutes(100);Firmicutes_unclassified(75);Firmicutes_unclassified(75);Firmicutes_unclassified(75);Firmicutes_unclassified(75);
Otu1477	4	Bacteria(100);Bacteroidetes(100);Bacteroidia(100);Bacteroidales(100);Porphyromonadaceae(100);Porphyromonadaceae_unclassified(100);
Otu1478	4	Bacteria(100);Firmicutes(100);Clostridia(100);Clostridiales(100);Ruminococcaceae(100);Butyricicoccus(100);
Otu1479	4	Bacteria(100);Firmicutes(100);Firmicutes_unclassified(100);Firmicutes_unclassified(100);Firmicutes_unclassified(100);Firmicutes_unclassified(100);
Otu1480	4	Bacteria(100);Firmicutes(100);Clostridia(100);Clostridiales(100);Lachnospiraceae(100);Lachnospiraceae_unclassified(75);
Otu1481	4	Bacteria(100);Bacteroidetes(100);Bacteroidia(100);Bacteroidales(100);Porphyromonadaceae(100);Porphyromonadaceae_unclassified(100);
Otu1482	4	Bacteria(100);Bacteroidetes(100);Bacteroidia(100);Bacteroidales(100);Bacteroidales_unclassified(100);Bacteroidales_unclassified(100);
Otu1483	4	Bacteria(100);Firmicutes(100);Clostridia(100);Clostridiales(100);Clostridiales_unclassified(75);Clostridiales_unclassified(75);
Otu1484	4	Bacteria(100);Verrucomicrobia(100);Verrucomicrobiae(100);Verrucomicrobiales(100);Verrucomicrobiaceae(100);Akkermansia(100);
Otu1485	4	Bacteria(100);Firmicutes(100);Clostridia(100);Clostridiales(100);Lachnospiraceae(75);Lachnospiraceae_unclassified(75);
Otu1486	4	Bacteria(100);Bacteroidetes(100);Flavobacteriia(100);Flavobacteriales(100);Flavobacteriaceae(100);Flavobacterium(100);
Otu1487	4	Bacteria(100);Bacteria_unclassified(75);Bacteria_unclassified(75);Bacteria_unclassified(75);Bacteria_unclassified(75);Bacteria_unclassified(75);
Otu1488	4	Bacteria(100);Firmicutes(100);Clostridia(100);Clostridiales(100);Clostridiales_Incertae_Sedis_XI(100);Tissierella(100);
Otu1489	4	Bacteria(100);Firmicutes(100);Clostridia(100);Clostridiales(100);Clostridiales_unclassified(100);Clostridiales_unclassified(100);
Otu1490	4	Bacteria(100);Firmicutes(100);Clostridia(100);Clostridiales(100);Lachnospiraceae(100);Lachnospiraceae_unclassified(100);
Otu1491	4	Bacteria(100);Firmicutes(100);Clostridia(100);Clostridiales(100);Lachnospiraceae(100);Lachnospiraceae_unclassified(100);
Otu1492	4	Bacteria(100);Bacteroidetes(100);Bacteroidia(100);Bacteroidales(100);Porphyromonadaceae(100);Porphyromonadaceae_unclassified(100);
Otu1493	4	Bacteria(100);Firmicutes(100);Clostridia(100);Clostridiales(100);Lachnospiraceae(100);Lachnospiraceae_unclassified(100);
Otu1494	4	Bacteria(100);Actinobacteria(100);Actinobacteria(100);Actinobacteria_unclassified(75);Actinobacteria_unclassified(75);Actinobacteria_unclassified(75);
Otu1495	4	Bacteria(100);Bacteroidetes(100);Bacteroidia(100);Bacteroidales(100);Porphyromonadaceae(100);Porphyromonadaceae_unclassified(100);
Otu1496	4	Bacteria(100);Firmicutes(100);Clostridia(100);Clostridiales(100);Peptostreptococcaceae(100);Proteocatella(100);
Otu1497	4	Bacteria(100);Firmicutes(100);Clostridia(100);Clostridiales(100);Lachnospiraceae(100);Lachnospiraceae_unclassified(100);
Otu1498	4	Bacteria(100);Firmicutes(100);Clostridia(100);Clostridiales(100);Lachnospiraceae(100);Lachnospiraceae_unclassified(75);
Otu1499	4	Bacteria(100);Firmicutes(100);Clostridia(100);Clostridiales(100);Lachnospiraceae(100);Lachnospiraceae_unclassified(100);
Otu1500	4	Bacteria(100);Proteobacteria(100);Gammaproteobacteria(100);Pseudomonadales(100);Pseudomonadaceae(100);Pseudomonas(100);
Otu1501	4	Bacteria(100);Bacteroidetes(100);Bacteroidia(100);Bacteroidales(100);Porphyromonadaceae(100);Porphyromonadaceae_unclassified(100);
Otu1502	4	Bacteria(100);Firmicutes(100);Clostridia(100);Clostridiales(100);Lachnospiraceae(100);Lachnospiraceae_unclassified(100);
Otu1503	4	Bacteria(100);Firmicutes(100);Clostridia(100);Clostridiales(100);Lachnospiraceae(75);Lachnospiraceae_unclassified(75);
Otu1504	4	Bacteria(100);Bacteroidetes(100);Bacteroidia(100);Bacteroidales(100);Porphyromonadaceae(100);Porphyromonadaceae_unclassified(100);
Otu1505	4	Bacteria(100);Firmicutes(100);Clostridia(100);Clostridiales(100);Lachnospiraceae(100);Lachnospiraceae_unclassified(100);
Otu1506	4	Bacteria(100);Firmicutes(100);Clostridia(100);Clostridiales(100);Lachnospiraceae(100);Acetatifactor(75);
Otu1507	4	Bacteria(100);Bacteroidetes(100);Bacteroidia(100);Bacteroidales(100);Porphyromonadaceae(100);Porphyromonadaceae_unclassified(100);
Otu1508	4	Bacteria(100);Firmicutes(100);Clostridia(100);Clostridiales(100);Lachnospiraceae(100);Lachnospiraceae_unclassified(100);
Otu1509	4	Bacteria(100);Firmicutes(100);Clostridia(100);Clostridiales(100);Lachnospiraceae(100);Lachnospiraceae_unclassified(100);
Otu1510	4	Bacteria(100);Firmicutes(100);Clostridia(100);Clostridiales(100);Lachnospiraceae(100);Lachnospiraceae_unclassified(100);
Otu1511	4	Bacteria(100);Firmicutes(100);Bacilli(100);Bacillales(100);Bacillaceae_2(100);Bacillaceae_2_unclassified(100);
Otu1512	4	Bacteria(100);Firmicutes(100);Clostridia(100);Clostridiales(100);Lachnospiraceae(100);Lachnospiraceae_unclassified(100);
Otu1513	4	Bacteria(100);Firmicutes(100);Clostridia(100);Clostridiales(100);Lachnospiraceae(100);Lachnospiraceae_unclassified(100);
Otu1514	4	Bacteria(100);Firmicutes(100);Clostridia(100);Clostridiales(100);Lachnospiraceae(100);Lachnospiraceae_unclassified(100);
Otu1515	4	Bacteria(100);Firmicutes(100);Clostridia(100);Clostridiales(100);Lachnospiraceae(100);Lachnospiraceae_unclassified(100);
Otu1516	4	Bacteria(100);Firmicutes(100);Bacilli(100);Lactobacillales(100);Lactobacillales_unclassified(100);Lactobacillales_unclassified(100);
Otu1517	4	Bacteria(100);Firmicutes(100);Erysipelotrichia(100);Erysipelotrichales(100);Erysipelotrichaceae(100);Turicibacter(100);
Otu1518	4	Bacteria(100);Firmicutes(100);Clostridia(100);Clostridiales(100);Lachnospiraceae(100);Lachnospiraceae_unclassified(100);
Otu1519	4	Bacteria(100);Firmicutes(100);Clostridia(100);Clostridiales(100);Lachnospiraceae(100);Lachnospiraceae_unclassified(100);
Otu1520	4	Bacteria(100);Bacteroidetes(100);Bacteroidia(100);Bacteroidales(100);Bacteroidales_unclassified(100);Bacteroidales_unclassified(100);
Otu1521	4	Bacteria(100);Firmicutes(100);Clostridia(100);Clostridiales(100);Lachnospiraceae(100);Lachnospiraceae_unclassified(100);
Otu1522	4	Bacteria(100);Firmicutes(100);Clostridia(100);Clostridiales(100);Lachnospiraceae(100);Lachnospiraceae_unclassified(100);
Otu1523	4	Bacteria(100);Firmicutes(100);Clostridia(100);Clostridiales(100);Lachnospiraceae(100);Lachnospiraceae_unclassified(100);
Otu1524	4	Bacteria(100);Firmicutes(100);Erysipelotrichia(100);Erysipelotrichales(100);Erysipelotrichaceae(100);Turicibacter(100);
Otu1525	4	Bacteria(100);Firmicutes(100);Clostridia(100);Clostridiales(100);Lachnospiraceae(100);Lachnospiraceae_unclassified(100);
Otu1526	4	Bacteria(100);Firmicutes(100);Clostridia(100);Clostridiales(100);Lachnospiraceae(100);Lachnospiraceae_unclassified(100);
Otu1527	4	Bacteria(100);Firmicutes(100);Bacilli(100);Lactobacillales(75);Streptococcaceae(75);Streptococcus(75);
Otu1528	4	Bacteria(100);Bacteroidetes(100);Bacteroidia(100);Bacteroidales(100);Porphyromonadaceae(100);Porphyromonadaceae_unclassified(100);
Otu1529	4	Bacteria(100);Bacteroidetes(100);Bacteroidia(100);Bacteroidales(100);Porphyromonadaceae(100);Porphyromonadaceae_unclassified(100);
Otu1530	4	Bacteria(100);Firmicutes(100);Clostridia(100);Clostridiales(100);Lachnospiraceae(100);Lachnospiraceae_unclassified(100);
Otu1531	4	Bacteria(100);Firmicutes(100);Clostridia(100);Clostridiales(100);Lachnospiraceae(100);Lachnospiraceae_unclassified(100);
Otu1532	4	Bacteria(100);Firmicutes(100);Clostridia(100);Clostridiales(100);Lachnospiraceae(100);Lachnospiraceae_unclassified(100);
Otu1533	4	Bacteria(100);Bacteroidetes(100);Bacteroidia(100);Bacteroidales(100);Porphyromonadaceae(100);Porphyromonadaceae_unclassified(100);
Otu1534	4	Bacteria(100);Firmicutes(100);Clostridia(100);Clostridiales(100);Lachnospiraceae(100);Acetatifactor(75);
Otu1535	4	Bacteria(100);Firmicutes(100);Clostridia(100);Clostridiales(100);Lachnospiraceae(100);Lachnospiraceae_unclassified(100);
Otu1536	4	Bacteria(100);Firmicutes(100);Clostridia(100);Clostridiales(100);Lachnospiraceae(100);Lachnospiraceae_unclassified(100);
Otu1537	4	Bacteria(100);Firmicutes(100);Clostridia(100);Clostridiales(100);Lachnospiraceae(100);Lachnospiraceae_unclassified(100);
Otu1538	4	Bacteria(100);Firmicutes(100);Clostridia(100);Clostridiales(100);Ruminococcaceae(100);Pseudoflavonifractor(100);
Otu1539	4	Bacteria(100);Firmicutes(100);Clostridia(100);Clostridiales(100);Lachnospiraceae(100);Lachnospiraceae_unclassified(100);
Otu1540	4	Bacteria(100);Firmicutes(100);Clostridia(100);Clostridiales(100);Lachnospiraceae(100);Lachnospiraceae_unclassified(100);
Otu1541	4	Bacteria(100);Firmicutes(100);Clostridia(100);Clostridiales(100);Lachnospiraceae(100);Lachnospiraceae_unclassified(100);
Otu1542	4	Bacteria(100);Firmicutes(100);Clostridia(100);Clostridiales(100);Clostridiales_unclassified(100);Clostridiales_unclassified(100);
Otu1543	4	Bacteria(100);Firmicutes(100);Clostridia(100);Clostridiales(100);Lachnospiraceae(100);Lachnospiraceae_unclassified(100);
Otu1544	4	Bacteria(100);Firmicutes(100);Clostridia(100);Clostridiales(100);Ruminococcaceae(100);Ruminococcaceae_unclassified(100);
Otu1545	4	Bacteria(100);Firmicutes(100);Clostridia(100);Clostridiales(100);Lachnospiraceae(75);Lachnospiraceae_unclassified(75);
Otu1546	4	Bacteria(100);Firmicutes(75);Clostridia(75);Clostridiales(75);Clostridiales_unclassified(75);Clostridiales_unclassified(75);
Otu1547	4	Bacteria(100);Firmicutes(100);Clostridia(100);Clostridiales(100);Ruminococcaceae(100);Ruminococcaceae_unclassified(100);
Otu1548	4	Bacteria(100);Firmicutes(100);Clostridia(75);Clostridiales(75);Clostridiales_unclassified(75);Clostridiales_unclassified(75);
Otu1549	4	Bacteria(100);Firmicutes(100);Clostridia(100);Clostridiales(100);Lachnospiraceae(100);Lachnospiraceae_unclassified(100);
Otu1550	4	Bacteria(100);Firmicutes(100);Clostridia(100);Clostridiales(100);Lachnospiraceae(100);Lachnospiraceae_unclassified(100);
Otu1551	4	Bacteria(100);Firmicutes(100);Clostridia(100);Clostridiales(100);Lachnospiraceae(100);Lachnospiraceae_unclassified(100);
Otu1552	4	Bacteria(100);Firmicutes(100);Clostridia(100);Clostridiales(100);Lachnospiraceae(100);Lachnospiraceae_unclassified(100);
Otu1553	4	Bacteria(100);Firmicutes(100);Clostridia(100);Clostridiales(100);Lachnospiraceae(100);Lachnospiraceae_unclassified(100);
Otu1554	4	Bacteria(100);Actinobacteria(100);Actinobacteria(100);Coriobacteriales(100);Coriobacteriaceae(100);Olsenella(100);
Otu1555	4	Bacteria(100);Firmicutes(100);Clostridia(100);Clostridiales(100);Lachnospiraceae(100);Lachnospiraceae_unclassified(100);
Otu1556	4	Bacteria(100);Firmicutes(100);Bacilli(100);Lactobacillales(100);Lactobacillales_unclassified(100);Lactobacillales_unclassified(100);
Otu1557	4	Bacteria(100);Firmicutes(100);Clostridia(100);Clostridiales(100);Lachnospiraceae(100);Dorea(100);
Otu1558	4	Bacteria(100);Firmicutes(100);Clostridia(100);Clostridiales(100);Clostridiales_unclassified(75);Clostridiales_unclassified(75);
Otu1559	4	Bacteria(100);Firmicutes(100);Clostridia(100);Clostridiales(100);Lachnospiraceae(100);Lachnospiraceae_unclassified(100);
Otu1560	4	Bacteria(100);Firmicutes(100);Clostridia(100);Clostridiales(100);Lachnospiraceae(100);Lachnospiraceae_unclassified(100);
Otu1561	4	Bacteria(100);Firmicutes(100);Clostridia(100);Clostridiales(100);Lachnospiraceae(100);Acetatifactor(100);
Otu1562	4	Bacteria(100);Firmicutes(100);Clostridia(100);Clostridiales(100);Ruminococcaceae(100);Ruminococcaceae_unclassified(100);
Otu1563	4	Bacteria(100);Firmicutes(100);Clostridia(100);Clostridiales(100);Lachnospiraceae(100);Lachnospiraceae_unclassified(100);
Otu1564	4	Bacteria(100);Firmicutes(100);Clostridia(100);Clostridiales(100);Ruminococcaceae(75);Pseudoflavonifractor(75);
Otu1565	4	Bacteria(100);Firmicutes(100);Clostridia(100);Clostridiales(100);Ruminococcaceae(100);Ruminococcaceae_unclassified(100);
Otu1566	4	Bacteria(100);Firmicutes(100);Clostridia(100);Clostridiales(100);Lachnospiraceae(100);Lachnospiraceae_unclassified(100);
Otu1567	4	Bacteria(100);Firmicutes(100);Clostridia(100);Clostridiales(100);Lachnospiraceae(100);Lachnospiraceae_unclassified(75);
Otu1568	4	Bacteria(100);Firmicutes(100);Clostridia(100);Clostridiales(100);Lachnospiraceae(100);Lachnospiraceae_unclassified(100);
Otu1569	4	Bacteria(100);Firmicutes(100);Clostridia(100);Clostridiales(100);Lachnospiraceae(100);Lachnospiraceae_unclassified(100);
Otu1570	4	Bacteria(100);Bacteroidetes(100);Bacteroidia(100);Bacteroidales(100);Porphyromonadaceae(100);Porphyromonadaceae_unclassified(100);
Otu1571	4	Bacteria(100);Firmicutes(100);Clostridia(100);Clostridiales(100);Lachnospiraceae(100);Lachnospiraceae_unclassified(100);
Otu1572	4	Bacteria(100);Firmicutes(100);Clostridia(100);Clostridiales(100);Clostridiales_unclassified(75);Clostridiales_unclassified(75);
Otu1573	4	Bacteria(100);Firmicutes(100);Clostridia(100);Clostridiales(100);Lachnospiraceae(100);Lachnospiraceae_unclassified(100);
Otu1574	4	Bacteria(100);Firmicutes(100);Clostridia(100);Clostridiales(100);Lachnospiraceae(100);Lachnospiraceae_unclassified(100);
Otu1575	4	Bacteria(100);Firmicutes(100);Clostridia(100);Clostridiales(100);Lachnospiraceae(100);Lachnospiraceae_unclassified(75);
Otu1576	4	Bacteria(100);Proteobacteria(100);Alphaproteobacteria(100);Rhizobiales(100);Methylobacteriaceae(100);Microvirga(100);
Otu1577	4	Bacteria(100);Firmicutes(100);Clostridia(100);Clostridiales(100);Lachnospiraceae(100);Lachnospiraceae_unclassified(100);
Otu1578	4	Bacteria(100);Firmicutes(100);Negativicutes(100);Selenomonadales(100);Veillonellaceae(100);Megasphaera(100);
Otu1579	4	Bacteria(100);Firmicutes(100);Clostridia(100);Clostridiales(100);Lachnospiraceae(100);Lachnospiraceae_unclassified(100);
Otu1580	4	Bacteria(100);Bacteria_unclassified(100);Bacteria_unclassified(100);Bacteria_unclassified(100);Bacteria_unclassified(100);Bacteria_unclassified(100);
Otu1581	4	Bacteria(100);Firmicutes(100);Clostridia(100);Clostridiales(100);Lachnospiraceae(100);Lachnospiraceae_unclassified(100);
Otu1582	4	Bacteria(100);Firmicutes(100);Clostridia(100);Clostridiales(100);Ruminococcaceae(100);Pseudoflavonifractor(100);
Otu1583	4	Bacteria(100);Bacteroidetes(100);Bacteroidia(100);Bacteroidales(100);Porphyromonadaceae(100);Porphyromonadaceae_unclassified(100);
Otu1584	4	Bacteria(100);Firmicutes(100);Clostridia(100);Clostridiales(100);Lachnospiraceae(100);Lachnospiraceae_unclassified(100);
Otu1585	4	Bacteria(100);Bacteroidetes(100);Bacteroidia(100);Bacteroidales(100);Porphyromonadaceae(100);Porphyromonadaceae_unclassified(100);
Otu1586	4	Bacteria(100);Bacteroidetes(100);Bacteroidia(100);Bacteroidales(100);Porphyromonadaceae(100);Porphyromonadaceae_unclassified(100);
Otu1587	4	Bacteria(100);Firmicutes(100);Clostridia(100);Clostridiales(100);Ruminococcaceae(75);Ruminococcaceae_unclassified(75);
Otu1588	4	Bacteria(100);Firmicutes(100);Clostridia(100);Clostridiales(100);Lachnospiraceae(100);Lachnospiraceae_unclassified(100);
Otu1589	4	Bacteria(100);Firmicutes(100);Clostridia(100);Clostridiales(100);Lachnospiraceae(100);Lachnospiraceae_unclassified(100);
Otu1590	4	Bacteria(100);Firmicutes(100);Clostridia(100);Clostridiales(100);Lachnospiraceae(100);Lachnospiraceae_unclassified(100);
Otu1591	4	Bacteria(100);Bacteroidetes(100);Bacteroidia(100);Bacteroidales(100);Porphyromonadaceae(100);Porphyromonadaceae_unclassified(100);
Otu1592	4	Bacteria(100);Firmicutes(100);Clostridia(100);Clostridiales(100);Lachnospiraceae(100);Lachnospiraceae_unclassified(100);
Otu1593	4	Bacteria(100);Firmicutes(100);Clostridia(100);Clostridiales(100);Lachnospiraceae(100);Lachnospiraceae_unclassified(75);
Otu1594	4	Bacteria(100);Firmicutes(100);Clostridia(100);Clostridiales(100);Clostridiales_unclassified(100);Clostridiales_unclassified(100);
Otu1595	4	Bacteria(100);Proteobacteria(100);Alphaproteobacteria(100);Rhizobiales(100);Brucellaceae(100);Ochrobactrum(100);
Otu1596	4	Bacteria(100);Bacteroidetes(100);Bacteroidia(100);Bacteroidales(100);Porphyromonadaceae(100);Porphyromonadaceae_unclassified(100);
Otu1597	4	Bacteria(100);Firmicutes(100);Clostridia(100);Clostridiales(100);Lachnospiraceae(100);Lachnospiraceae_unclassified(100);
Otu1598	4	Bacteria(100);Firmicutes(100);Clostridia(100);Clostridiales(100);Clostridiales_unclassified(100);Clostridiales_unclassified(100);
Otu1599	4	Bacteria(100);Firmicutes(100);Clostridia(100);Clostridiales(100);Lachnospiraceae(100);Lachnospiraceae_unclassified(100);
Otu1600	4	Bacteria(100);Firmicutes(100);Clostridia(100);Clostridiales(100);Lachnospiraceae(100);Lachnospiraceae_unclassified(100);
Otu1601	4	Bacteria(100);Firmicutes(100);Clostridia(100);Clostridiales(100);Ruminococcaceae(100);Ruminococcaceae_unclassified(100);
Otu1602	4	Bacteria(100);Bacteria_unclassified(100);Bacteria_unclassified(100);Bacteria_unclassified(100);Bacteria_unclassified(100);Bacteria_unclassified(100);
Otu1603	4	Bacteria(100);Firmicutes(100);Clostridia(100);Clostridiales(100);Lachnospiraceae(100);Lachnospiraceae_unclassified(100);
Otu1604	4	Bacteria(100);Firmicutes(100);Clostridia(100);Clostridiales(100);Lachnospiraceae(100);Lachnospiraceae_unclassified(100);
Otu1605	4	Bacteria(100);Firmicutes(100);Clostridia(100);Clostridiales(100);Ruminococcaceae(100);Ruminococcaceae_unclassified(100);
Otu1606	4	Bacteria(100);Firmicutes(100);Clostridia(100);Clostridiales(100);Lachnospiraceae(100);Lachnospiraceae_unclassified(100);
Otu1607	4	Bacteria(100);Firmicutes(100);Clostridia(100);Clostridiales(100);Lachnospiraceae(100);Lachnospiraceae_unclassified(100);
Otu1608	4	Bacteria(100);Firmicutes(100);Clostridia(100);Clostridiales(100);Lachnospiraceae(100);Lachnospiraceae_unclassified(100);
Otu1609	4	Bacteria(100);Firmicutes(100);Clostridia(100);Clostridiales(100);Lachnospiraceae(100);Lachnospiraceae_unclassified(75);
Otu1610	4	Bacteria(100);Actinobacteria(100);Actinobacteria(100);Coriobacteriales(100);Coriobacteriaceae(100);Coriobacteriaceae_unclassified(100);
Otu1611	4	Bacteria(100);Firmicutes(100);Clostridia(100);Clostridiales(100);Lachnospiraceae(100);Lachnospiraceae_unclassified(100);
Otu1612	4	Bacteria(100);Firmicutes(100);Clostridia(100);Clostridiales(100);Lachnospiraceae(100);Lachnospiraceae_unclassified(100);
Otu1613	4	Bacteria(100);Firmicutes(100);Negativicutes(100);Selenomonadales(100);Veillonellaceae(100);Veillonellaceae_unclassified(100);
Otu1614	4	Bacteria(100);Firmicutes(100);Clostridia(100);Clostridiales(100);Ruminococcaceae(100);Pseudoflavonifractor(100);
Otu1615	4	Bacteria(100);Firmicutes(100);Clostridia(100);Clostridiales(100);Lachnospiraceae(100);Lachnospiraceae_unclassified(100);
Otu1616	4	Bacteria(100);Firmicutes(100);Bacilli(100);Bacillales(100);Bacillaceae_1(100);Aeribacillus(100);
Otu1617	4	Bacteria(100);Bacteroidetes(100);Bacteroidia(100);Bacteroidales(100);Porphyromonadaceae(100);Porphyromonadaceae_unclassified(100);
Otu1618	4	Bacteria(100);Bacteroidetes(100);Bacteroidia(100);Bacteroidales(100);Porphyromonadaceae(100);Porphyromonadaceae_unclassified(100);
Otu1619	4	Bacteria(100);Firmicutes(100);Clostridia(100);Clostridiales(100);Lachnospiraceae(100);Lachnospiraceae_unclassified(100);
Otu1620	4	Bacteria(100);Actinobacteria(100);Actinobacteria(100);Actinomycetales(100);Pseudonocardiaceae(100);Pseudonocardiaceae_unclassified(100);
Otu1621	4	Bacteria(100);Bacteroidetes(100);Bacteroidia(100);Bacteroidales(100);Porphyromonadaceae(100);Porphyromonadaceae_unclassified(100);
Otu1622	4	Bacteria(100);Bacteroidetes(100);Bacteroidia(100);Bacteroidales(100);Porphyromonadaceae(100);Porphyromonadaceae_unclassified(100);
Otu1623	4	Bacteria(100);Bacteroidetes(100);Bacteroidia(100);Bacteroidales(100);Porphyromonadaceae(100);Porphyromonadaceae_unclassified(100);
Otu1624	4	Bacteria(100);Firmicutes(100);Clostridia(100);Clostridiales(100);Lachnospiraceae(100);Lachnospiraceae_unclassified(100);
Otu1625	4	Bacteria(100);Firmicutes(100);Clostridia(100);Clostridiales(100);Lachnospiraceae(100);Lachnospiraceae_unclassified(100);
Otu1626	4	Bacteria(100);Firmicutes(100);Clostridia(100);Clostridiales(100);Lachnospiraceae(100);Clostridium_XlVa(75);
Otu1627	4	Bacteria(100);Firmicutes(100);Clostridia(100);Clostridiales(100);Clostridiales_unclassified(100);Clostridiales_unclassified(100);
Otu1628	4	Bacteria(100);Firmicutes(100);Clostridia(100);Clostridiales(100);Lachnospiraceae(100);Lachnospiraceae_unclassified(100);
Otu1629	4	Bacteria(100);Firmicutes(100);Clostridia(100);Clostridiales(100);Clostridiales_unclassified(100);Clostridiales_unclassified(100);
Otu1630	4	Bacteria(100);Firmicutes(100);Clostridia(100);Clostridiales(100);Lachnospiraceae(100);Lachnospiraceae_unclassified(100);
Otu1631	4	Bacteria(100);Firmicutes(100);Clostridia(100);Clostridiales(100);Lachnospiraceae(100);Lachnospiraceae_unclassified(100);
Otu1632	4	Bacteria(100);Bacteroidetes(100);Bacteroidia(75);Bacteroidales(75);Bacteroidales_unclassified(75);Bacteroidales_unclassified(75);
Otu1633	4	Bacteria(100);Firmicutes(100);Clostridia(100);Clostridiales(100);Ruminococcaceae(100);Ruminococcaceae_unclassified(75);
Otu1634	4	Bacteria(100);Bacteroidetes(75);Bacteroidetes_unclassified(75);Bacteroidetes_unclassified(75);Bacteroidetes_unclassified(75);Bacteroidetes_unclassified(75);
Otu1635	4	Bacteria(100);Firmicutes(100);Bacilli(100);Bacillales(100);Bacillales_unclassified(100);Bacillales_unclassified(100);
Otu1636	4	Bacteria(100);Firmicutes(100);Clostridia(100);Clostridiales(100);Lachnospiraceae(100);Clostridium_XlVa(75);
Otu1637	4	Bacteria(100);Bacteroidetes(100);Bacteroidia(100);Bacteroidales(100);Porphyromonadaceae(100);Porphyromonadaceae_unclassified(100);
Otu1638	4	Bacteria(100);Firmicutes(100);Clostridia(100);Clostridiales(100);Lachnospiraceae(100);Lachnospiraceae_unclassified(100);
Otu1639	4	Bacteria(100);Firmicutes(100);Bacilli(100);Lactobacillales(100);Lactobacillaceae(100);Lactobacillus(100);
Otu1640	4	Bacteria(100);Firmicutes(100);Clostridia(100);Clostridiales(100);Clostridiales_Incertae_Sedis_XI(100);Sedimentibacter(100);
Otu1641	4	Bacteria(100);Firmicutes(100);Clostridia(100);Clostridiales(100);Ruminococcaceae(100);Ruminococcaceae_unclassified(100);
Otu1642	4	Bacteria(100);Firmicutes(100);Clostridia(100);Clostridiales(100);Ruminococcaceae(100);Ruminococcaceae_unclassified(100);
Otu1643	4	Bacteria(100);Bacteroidetes(100);Bacteroidia(100);Bacteroidales(100);Bacteroidales_unclassified(100);Bacteroidales_unclassified(100);
Otu1644	4	Bacteria(100);Firmicutes(100);Firmicutes_unclassified(100);Firmicutes_unclassified(100);Firmicutes_unclassified(100);Firmicutes_unclassified(100);
Otu1645	4	Bacteria(100);Firmicutes(100);Clostridia(100);Clostridiales(100);Clostridiaceae_1(100);Clostridiaceae_1_unclassified(100);
Otu1646	4	Bacteria(100);Firmicutes(100);Erysipelotrichia(100);Erysipelotrichales(100);Erysipelotrichaceae(100);Erysipelotrichaceae_unclassified(100);
Otu1647	4	Bacteria(100);Proteobacteria(100);Alphaproteobacteria(100);Sphingomonadales(100);Sphingomonadaceae(100);Sphingomonas(100);
Otu1648	4	Bacteria(100);Bacteroidetes(100);Bacteroidia(100);Bacteroidales(100);Porphyromonadaceae(100);Porphyromonadaceae_unclassified(100);
Otu1649	4	Bacteria(100);Firmicutes(100);Clostridia(100);Clostridiales(100);Clostridiales_unclassified(100);Clostridiales_unclassified(100);
Otu1650	4	Bacteria(100);Firmicutes(100);Clostridia(100);Clostridiales(100);Lachnospiraceae(100);Lachnospiraceae_unclassified(100);
Otu1651	4	Bacteria(100);Firmicutes(100);Clostridia(100);Clostridiales(100);Lachnospiraceae(100);Lachnospiraceae_unclassified(100);
Otu1652	4	Bacteria(100);Firmicutes(100);Clostridia(100);Clostridiales(100);Clostridiaceae_1(100);Clostridium_sensu_stricto(75);
Otu1653	4	Bacteria(100);Bacteroidetes(100);Bacteroidia(100);Bacteroidales(100);Porphyromonadaceae(100);Porphyromonadaceae_unclassified(100);
Otu1654	4	Bacteria(100);Proteobacteria(100);Gammaproteobacteria(100);Enterobacteriales(100);Enterobacteriaceae(100);Enterobacteriaceae_unclassified(100);
Otu1655	4	Bacteria(100);Firmicutes(100);Clostridia(100);Clostridiales(100);Lachnospiraceae(100);Lachnospiraceae_unclassified(100);
Otu1656	4	Bacteria(100);Firmicutes(100);Clostridia(100);Clostridiales(100);Lachnospiraceae(100);Lachnospiraceae_unclassified(100);
Otu1657	4	Bacteria(100);Firmicutes(100);Bacilli(100);Bacillales(100);Bacillales_unclassified(100);Bacillales_unclassified(100);
Otu1658	4	Bacteria(100);Proteobacteria(100);Alphaproteobacteria(100);Rhizobiales(100);Methylobacteriaceae(100);Microvirga(100);
Otu1659	4	Bacteria(100);Actinobacteria(100);Actinobacteria(100);Actinomycetales(100);Tsukamurellaceae(100);Tsukamurella(100);
Otu1660	4	Bacteria(100);Firmicutes(100);Bacilli(100);Lactobacillales(100);Lactobacillaceae(100);Lactobacillus(100);
Otu1661	4	Bacteria(100);Bacteroidetes(100);Bacteroidia(100);Bacteroidales(100);Porphyromonadaceae(100);Porphyromonadaceae_unclassified(100);
Otu1662	4	Bacteria(100);Firmicutes(100);Bacilli(100);Bacillales(100);Paenibacillaceae_1(100);Paenibacillus(100);
Otu1663	4	Bacteria(100);Proteobacteria(100);Gammaproteobacteria(100);Enterobacteriales(100);Enterobacteriaceae(100);Enterobacteriaceae_unclassified(100);
Otu1664	4	Bacteria(100);Firmicutes(100);Clostridia(100);Clostridiales(100);Clostridiales_unclassified(100);Clostridiales_unclassified(100);
Otu1665	4	Bacteria(100);Bacteroidetes(100);Bacteroidia(100);Bacteroidales(100);Porphyromonadaceae(100);Porphyromonadaceae_unclassified(100);
Otu1666	4	Bacteria(100);Proteobacteria(100);Betaproteobacteria(100);Burkholderiales(100);Sutterellaceae(100);Parasutterella(100);
Otu1667	4	Bacteria(100);Firmicutes(75);Clostridia(75);Clostridiales(75);Clostridiales_unclassified(75);Clostridiales_unclassified(75);
Otu1668	4	Bacteria(100);Firmicutes(100);Negativicutes(100);Selenomonadales(100);Veillonellaceae(100);Pectinatus(100);
Otu1669	4	Bacteria(100);Firmicutes(100);Clostridia(100);Clostridiales(100);Clostridiales_unclassified(100);Clostridiales_unclassified(100);
Otu1670	4	Bacteria(100);Bacteroidetes(100);Bacteroidia(100);Bacteroidales(100);Porphyromonadaceae(75);Porphyromonadaceae_unclassified(75);
Otu1671	4	Bacteria(100);Firmicutes(100);Clostridia(100);Clostridiales(100);Lachnospiraceae(100);Lachnospiraceae_unclassified(100);
Otu1672	4	Bacteria(100);Firmicutes(100);Clostridia(100);Clostridiales(100);Lachnospiraceae(100);Lachnospiraceae_unclassified(100);
Otu1673	4	Bacteria(100);Firmicutes(100);Clostridia(100);Clostridiales(100);Lachnospiraceae(100);Lachnospiraceae_unclassified(100);
Otu1674	3	Bacteria(100);Firmicutes(100);Clostridia(100);Clostridiales(100);Ruminococcaceae(100);Ruminococcus(100);
Otu1675	3	Bacteria(100);Bacteroidetes(100);Bacteroidia(100);Bacteroidales(100);Porphyromonadaceae(100);Porphyromonadaceae_unclassified(100);
Otu1676	3	Bacteria(100);Firmicutes(100);Clostridia(100);Clostridiales(100);Lachnospiraceae(100);Lachnospiraceae_unclassified(100);
Otu1677	3	Bacteria(100);Firmicutes(100);Clostridia(100);Clostridiales(100);Lachnospiraceae(100);Lachnospiraceae_unclassified(100);
Otu1678	3	Bacteria(100);Firmicutes(100);Clostridia(100);Clostridiales(100);Ruminococcaceae(100);Ruminococcaceae_unclassified(67);
Otu1679	3	Bacteria(100);Firmicutes(100);Clostridia(100);Clostridiales(100);Peptostreptococcaceae(100);Peptostreptococcaceae_unclassified(100);
Otu1680	3	Bacteria(100);Bacteroidetes(100);Bacteroidia(100);Bacteroidales(100);Porphyromonadaceae(100);Porphyromonadaceae_unclassified(100);
Otu1681	3	Bacteria(100);Firmicutes(100);Clostridia(100);Clostridiales(100);Clostridiaceae_1(100);Clostridium_sensu_stricto(100);
Otu1682	3	Bacteria(100);Bacteroidetes(100);Bacteroidia(100);Bacteroidales(100);Porphyromonadaceae(100);Porphyromonadaceae_unclassified(100);
Otu1683	3	Bacteria(100);Firmicutes(100);Clostridia(100);Clostridiales(100);Lachnospiraceae(100);Lachnospiraceae_unclassified(67);
Otu1684	3	Bacteria(100);Firmicutes(100);Clostridia(67);Clostridiales(67);Clostridiales_unclassified(67);Clostridiales_unclassified(67);
Otu1685	3	Bacteria(100);Firmicutes(100);Clostridia(100);Clostridiales(100);Lachnospiraceae(100);Lachnospiraceae_unclassified(100);
Otu1686	3	Bacteria(100);Bacteroidetes(100);Bacteroidia(100);Bacteroidales(100);Porphyromonadaceae(67);Porphyromonadaceae_unclassified(67);
Otu1687	3	Bacteria(100);Firmicutes(100);Clostridia(100);Clostridiales(100);Clostridiales_unclassified(100);Clostridiales_unclassified(100);
Otu1688	3	Bacteria(100);Firmicutes(100);Clostridia(100);Clostridiales(100);Lachnospiraceae(100);Lachnospiraceae_unclassified(100);
Otu1689	3	Bacteria(100);Firmicutes(100);Clostridia(100);Clostridiales(100);Lachnospiraceae(100);Lachnospiraceae_unclassified(100);
Otu1690	3	Bacteria(100);Firmicutes(100);Clostridia(100);Clostridiales(100);Ruminococcaceae(67);Ruminococcaceae_unclassified(67);
Otu1691	3	Bacteria(100);Firmicutes(100);Clostridia(100);Clostridiales(100);Lachnospiraceae(100);Lachnospiraceae_unclassified(100);
Otu1692	3	Bacteria(100);Firmicutes(100);Clostridia(100);Clostridiales(100);Lachnospiraceae(100);Lachnospiraceae_unclassified(100);
Otu1693	3	Bacteria(100);Firmicutes(100);Clostridia(100);Clostridiales(100);Lachnospiraceae(100);Lachnospiraceae_unclassified(100);
Otu1694	3	Bacteria(100);Firmicutes(100);Clostridia(100);Clostridiales(100);Ruminococcaceae(100);Ruminococcaceae_unclassified(100);
Otu1695	3	Bacteria(100);Firmicutes(100);Clostridia(100);Clostridiales(100);Clostridiales_unclassified(100);Clostridiales_unclassified(100);
Otu1696	3	Bacteria(100);Firmicutes(100);Clostridia(100);Clostridiales(100);Clostridiales_unclassified(100);Clostridiales_unclassified(100);
Otu1697	3	Bacteria(100);Firmicutes(100);Bacilli(100);Bacillales(67);Staphylococcaceae(67);Staphylococcus(67);
Otu1698	3	Bacteria(100);Firmicutes(100);Firmicutes_unclassified(67);Firmicutes_unclassified(67);Firmicutes_unclassified(67);Firmicutes_unclassified(67);
Otu1699	3	Bacteria(100);Firmicutes(100);Clostridia(100);Clostridiales(100);Lachnospiraceae(100);Lachnospiraceae_unclassified(100);
Otu1700	3	Bacteria(100);Firmicutes(100);Clostridia(100);Clostridiales(100);Lachnospiraceae(100);Lachnospiraceae_unclassified(100);
Otu1701	3	Bacteria(100);Firmicutes(100);Bacilli(100);Bacillales(100);Bacillaceae_2(100);Bacillaceae_2_unclassified(100);
Otu1702	3	Bacteria(100);Firmicutes(100);Clostridia(100);Clostridiales(100);Lachnospiraceae(100);Lachnospiraceae_unclassified(100);
Otu1703	3	Bacteria(100);Firmicutes(100);Clostridia(100);Clostridiales(100);Lachnospiraceae(100);Lachnospiraceae_unclassified(100);
Otu1704	3	Bacteria(100);Firmicutes(100);Clostridia(100);Clostridiales(100);Lachnospiraceae(100);Lachnospiraceae_unclassified(67);
Otu1705	3	Bacteria(100);Firmicutes(100);Clostridia(100);Clostridiales(100);Lachnospiraceae(100);Lachnospiraceae_unclassified(100);
Otu1706	3	Bacteria(100);Firmicutes(100);Clostridia(100);Clostridiales(100);Lachnospiraceae(100);Lachnospiraceae_unclassified(100);
Otu1707	3	Bacteria(100);Bacteria_unclassified(100);Bacteria_unclassified(100);Bacteria_unclassified(100);Bacteria_unclassified(100);Bacteria_unclassified(100);
Otu1708	3	Bacteria(100);Firmicutes(100);Bacilli(100);Bacillales(100);Thermoactinomycetaceae_2(100);Planifilum(100);
Otu1709	3	Bacteria(100);Firmicutes(100);Clostridia(100);Clostridiales(100);Lachnospiraceae(100);Lachnospiraceae_unclassified(100);
Otu1710	3	Bacteria(100);Firmicutes(100);Erysipelotrichia(100);Erysipelotrichales(100);Erysipelotrichaceae(100);Turicibacter(100);
Otu1711	3	Bacteria(100);Firmicutes(100);Clostridia(100);Clostridiales(100);Ruminococcaceae(100);Ruminococcaceae_unclassified(100);
Otu1712	3	Bacteria(100);Firmicutes(100);Clostridia(100);Clostridiales(100);Lachnospiraceae(100);Acetatifactor(100);
Otu1713	3	Bacteria(100);Firmicutes(100);Clostridia(100);Clostridiales(100);Lachnospiraceae(100);Lachnospiraceae_unclassified(100);
Otu1714	3	Bacteria(100);Firmicutes(67);Firmicutes_unclassified(67);Firmicutes_unclassified(67);Firmicutes_unclassified(67);Firmicutes_unclassified(67);
Otu1715	3	Bacteria(100);Firmicutes(67);Clostridia(67);Clostridiales(67);Clostridiales_unclassified(67);Clostridiales_unclassified(67);
Otu1716	3	Bacteria(100);Firmicutes(100);Clostridia(100);Clostridiales(100);Lachnospiraceae(100);Lachnospiraceae_unclassified(100);
Otu1717	3	Bacteria(100);Firmicutes(100);Negativicutes(100);Selenomonadales(100);Veillonellaceae(100);Selenomonas(100);
Otu1718	3	Bacteria(100);Bacteroidetes(100);Bacteroidia(100);Bacteroidales(100);Porphyromonadaceae(100);Porphyromonadaceae_unclassified(100);
Otu1719	3	Bacteria(100);Firmicutes(100);Clostridia(100);Clostridiales(100);Lachnospiraceae(100);Lachnospiraceae_unclassified(100);
Otu1720	3	Bacteria(100);Firmicutes(100);Clostridia(100);Clostridiales(100);Lachnospiraceae(100);Lachnospiraceae_unclassified(100);
Otu1721	3	Bacteria(100);Firmicutes(100);Clostridia(100);Clostridiales(100);Lachnospiraceae(100);Lachnospiraceae_unclassified(100);
Otu1722	3	Bacteria(100);Firmicutes(100);Clostridia(100);Clostridiales(100);Lachnospiraceae(100);Lachnospiraceae_unclassified(100);
Otu1723	3	Bacteria(100);Firmicutes(100);Clostridia(100);Clostridiales(100);Lachnospiraceae(100);Lachnospiraceae_unclassified(100);
Otu1724	3	Bacteria(100);Firmicutes(100);Clostridia(100);Clostridiales(100);Lachnospiraceae(100);Lachnospiraceae_unclassified(100);
Otu1725	3	Bacteria(100);Bacteroidetes(100);Bacteroidia(100);Bacteroidales(100);Porphyromonadaceae(100);Porphyromonadaceae_unclassified(100);
Otu1726	3	Bacteria(100);Firmicutes(100);Clostridia(100);Clostridiales(100);Lachnospiraceae(100);Lachnospiraceae_unclassified(67);
Otu1727	3	Bacteria(100);Firmicutes(100);Clostridia(100);Clostridiales(100);Lachnospiraceae(67);Lachnospiraceae_unclassified(67);
Otu1728	3	Bacteria(100);Bacteroidetes(100);Bacteroidia(100);Bacteroidales(100);Porphyromonadaceae(100);Porphyromonadaceae_unclassified(100);
Otu1729	3	Bacteria(100);Bacteroidetes(100);Bacteroidia(100);Bacteroidales(100);Porphyromonadaceae(100);Porphyromonadaceae_unclassified(100);
Otu1730	3	Bacteria(100);Firmicutes(100);Clostridia(100);Clostridiales(100);Ruminococcaceae(100);Oscillibacter(67);
Otu1731	3	Bacteria(100);Firmicutes(100);Clostridia(100);Clostridiales(100);Clostridiaceae_1(100);Clostridium_sensu_stricto(100);
Otu1732	3	Bacteria(100);Actinobacteria(100);Actinobacteria(100);Coriobacteriales(100);Coriobacteriaceae(100);Coriobacteriaceae_unclassified(100);
Otu1733	3	Bacteria(100);Bacteroidetes(100);Bacteroidia(100);Bacteroidales(100);Porphyromonadaceae(100);Porphyromonadaceae_unclassified(100);
Otu1734	3	Bacteria(100);Firmicutes(100);Bacilli(100);Lactobacillales(100);Lactobacillaceae(100);Lactobacillus(100);
Otu1735	3	Bacteria(100);Proteobacteria(100);Betaproteobacteria(100);Burkholderiales(100);Comamonadaceae(67);Comamonadaceae_unclassified(67);
Otu1736	3	Bacteria(100);Bacteroidetes(100);Bacteroidia(100);Bacteroidales(100);Porphyromonadaceae(100);Porphyromonadaceae_unclassified(100);
Otu1737	3	Bacteria(100);Proteobacteria(100);Gammaproteobacteria(100);Enterobacteriales(100);Enterobacteriaceae(100);Enterobacteriaceae_unclassified(100);
Otu1738	3	Bacteria(100);Firmicutes(100);Clostridia(100);Clostridiales(100);Lachnospiraceae(100);Acetatifactor(100);
Otu1739	3	Bacteria(100);Firmicutes(100);Clostridia(100);Clostridiales(100);Lachnospiraceae(100);Lachnospiraceae_unclassified(100);
Otu1740	3	Bacteria(100);Firmicutes(100);Clostridia(100);Clostridiales(100);Lachnospiraceae(100);Lachnospiraceae_unclassified(100);
Otu1741	3	Bacteria(100);Bacteroidetes(100);Bacteroidia(100);Bacteroidales(100);Porphyromonadaceae(100);Porphyromonadaceae_unclassified(100);
Otu1742	3	Bacteria(100);Firmicutes(100);Clostridia(100);Clostridiales(100);Lachnospiraceae(100);Lachnospiraceae_unclassified(100);
Otu1743	3	Bacteria(100);Bacteria_unclassified(100);Bacteria_unclassified(100);Bacteria_unclassified(100);Bacteria_unclassified(100);Bacteria_unclassified(100);
Otu1744	3	Bacteria(100);Firmicutes(100);Clostridia(100);Clostridiales(100);Lachnospiraceae(100);Lachnospiraceae_unclassified(100);
Otu1745	3	Bacteria(100);Bacteroidetes(100);Bacteroidia(100);Bacteroidales(100);Porphyromonadaceae(100);Porphyromonadaceae_unclassified(100);
Otu1746	3	Bacteria(100);Firmicutes(100);Clostridia(100);Clostridiales(100);Clostridiales_unclassified(100);Clostridiales_unclassified(100);
Otu1747	3	Bacteria(100);Firmicutes(100);Clostridia(100);Clostridiales(100);Lachnospiraceae(100);Lachnospiraceae_unclassified(100);
Otu1748	3	Bacteria(100);Firmicutes(100);Clostridia(100);Clostridiales(100);Lachnospiraceae(100);Lachnospiraceae_unclassified(100);
Otu1749	3	Bacteria(100);Firmicutes(100);Clostridia(100);Clostridiales(100);Ruminococcaceae(100);Ruminococcaceae_unclassified(100);
Otu1750	3	Bacteria(100);Firmicutes(100);Clostridia(100);Clostridiales(100);Clostridiales_unclassified(67);Clostridiales_unclassified(67);
Otu1751	3	Bacteria(100);Firmicutes(100);Erysipelotrichia(100);Erysipelotrichales(100);Erysipelotrichaceae(100);Coprobacillus(100);
Otu1752	3	Bacteria(100);Firmicutes(100);Clostridia(100);Clostridiales(100);Lachnospiraceae(67);Lachnospiraceae_unclassified(67);
Otu1753	3	Bacteria(100);Firmicutes(100);Clostridia(100);Clostridiales(100);Lachnospiraceae(100);Lachnospiraceae_unclassified(100);
Otu1754	3	Bacteria(100);Bacteria_unclassified(67);Bacteria_unclassified(67);Bacteria_unclassified(67);Bacteria_unclassified(67);Bacteria_unclassified(67);
Otu1755	3	Bacteria(100);Bacteria_unclassified(100);Bacteria_unclassified(100);Bacteria_unclassified(100);Bacteria_unclassified(100);Bacteria_unclassified(100);
Otu1756	3	Bacteria(100);Firmicutes(100);Bacilli(100);Lactobacillales(100);Lactobacillales_unclassified(100);Lactobacillales_unclassified(100);
Otu1757	3	Bacteria(100);Firmicutes(100);Clostridia(100);Clostridiales(100);Lachnospiraceae(100);Lachnospiraceae_unclassified(100);
Otu1758	3	Bacteria(100);Firmicutes(100);Clostridia(100);Clostridiales(100);Lachnospiraceae(100);Lachnospiraceae_unclassified(67);
Otu1759	3	Bacteria(100);Firmicutes(100);Clostridia(100);Clostridiales(100);Lachnospiraceae(100);Lachnospiraceae_unclassified(100);
Otu1760	3	Bacteria(100);Firmicutes(100);Clostridia(100);Clostridiales(100);Lachnospiraceae(100);Lachnospiraceae_unclassified(100);
Otu1761	3	Bacteria(100);Firmicutes(100);Clostridia(100);Clostridiales(100);Lachnospiraceae(100);Lachnospiraceae_unclassified(100);
Otu1762	3	Bacteria(100);Firmicutes(100);Clostridia(100);Clostridiales(100);Lachnospiraceae(100);Lachnospiraceae_unclassified(100);
Otu1763	3	Bacteria(100);Firmicutes(100);Clostridia(100);Clostridiales(100);Lachnospiraceae(100);Lachnospiraceae_unclassified(100);
Otu1764	3	Bacteria(100);Bacteroidetes(100);Bacteroidia(100);Bacteroidales(100);Porphyromonadaceae(100);Porphyromonadaceae_unclassified(100);
Otu1765	3	Bacteria(100);Firmicutes(100);Clostridia(100);Clostridiales(100);Lachnospiraceae(100);Lachnospiraceae_unclassified(100);
Otu1766	3	Bacteria(100);Bacteroidetes(100);Bacteroidia(100);Bacteroidales(100);Porphyromonadaceae(100);Porphyromonadaceae_unclassified(100);
Otu1767	3	Bacteria(100);Firmicutes(100);Clostridia(100);Clostridiales(100);Lachnospiraceae(100);Lachnospiraceae_unclassified(100);
Otu1768	3	Bacteria(100);Firmicutes(100);Clostridia(100);Clostridiales(100);Lachnospiraceae(100);Lachnospiraceae_unclassified(100);
Otu1769	3	Bacteria(100);Firmicutes(100);Clostridia(100);Clostridiales(100);Lachnospiraceae(100);Lachnospiraceae_unclassified(100);
Otu1770	3	Bacteria(100);Firmicutes(100);Clostridia(100);Clostridiales(100);Lachnospiraceae(100);Lachnospiraceae_unclassified(100);
Otu1771	3	Bacteria(100);Firmicutes(100);Clostridia(100);Clostridiales(100);Lachnospiraceae(100);Lachnospiraceae_unclassified(100);
Otu1772	3	Bacteria(100);Firmicutes(100);Clostridia(100);Clostridiales(100);Clostridiales_Incertae_Sedis_XI(100);Tissierella(100);
Otu1773	3	Bacteria(100);Firmicutes(100);Firmicutes_unclassified(100);Firmicutes_unclassified(100);Firmicutes_unclassified(100);Firmicutes_unclassified(100);
Otu1774	3	Bacteria(100);Firmicutes(100);Clostridia(100);Clostridiales(100);Lachnospiraceae(100);Lachnospiraceae_unclassified(100);
Otu1775	3	Bacteria(100);Bacteroidetes(100);Cytophagia(100);Cytophagales(100);Cytophagaceae(100);Spirosoma(100);
Otu1776	3	Bacteria(100);Firmicutes(100);Clostridia(100);Clostridiales(100);Lachnospiraceae(100);Lachnospiraceae_unclassified(100);
Otu1777	3	Bacteria(100);Firmicutes(100);Clostridia(100);Clostridiales(100);Ruminococcaceae(100);Clostridium_IV(100);
Otu1778	3	Bacteria(100);Proteobacteria(100);Gammaproteobacteria(100);Enterobacteriales(100);Enterobacteriaceae(100);Enterobacteriaceae_unclassified(100);
Otu1779	3	Bacteria(100);Firmicutes(100);Clostridia(100);Clostridiales(100);Lachnospiraceae(100);Lachnospiraceae_unclassified(100);
Otu1780	3	Bacteria(100);Firmicutes(100);Clostridia(100);Clostridiales(100);Ruminococcaceae(100);Ruminococcaceae_unclassified(100);
Otu1781	3	Bacteria(100);Firmicutes(100);Clostridia(100);Clostridiales(100);Lachnospiraceae(100);Lachnospiraceae_unclassified(100);
Otu1782	3	Bacteria(100);Firmicutes(100);Clostridia(100);Clostridiales(100);Lachnospiraceae(100);Lachnospiraceae_unclassified(100);
Otu1783	3	Bacteria(100);Firmicutes(100);Clostridia(100);Clostridiales(100);Lachnospiraceae(100);Lachnospiraceae_unclassified(100);
Otu1784	3	Bacteria(100);Firmicutes(100);Clostridia(100);Clostridiales(100);Clostridiales_unclassified(100);Clostridiales_unclassified(100);
Otu1785	3	Bacteria(100);Bacteroidetes(100);Bacteroidia(100);Bacteroidales(100);Porphyromonadaceae(100);Porphyromonadaceae_unclassified(100);
Otu1786	3	Bacteria(100);Firmicutes(100);Clostridia(100);Clostridiales(100);Lachnospiraceae(100);Lachnospiraceae_unclassified(100);
Otu1787	3	Bacteria(100);Firmicutes(100);Clostridia(100);Clostridiales(100);Ruminococcaceae(100);Ruminococcaceae_unclassified(100);
Otu1788	3	Bacteria(100);Firmicutes(100);Clostridia(100);Clostridiales(100);Lachnospiraceae(100);Lachnospiraceae_unclassified(67);
Otu1789	3	Bacteria(100);Bacteroidetes(100);Bacteroidia(100);Bacteroidales(100);Porphyromonadaceae(100);Porphyromonadaceae_unclassified(100);
Otu1790	3	Bacteria(100);Firmicutes(100);Clostridia(100);Clostridiales(100);Clostridiales_unclassified(100);Clostridiales_unclassified(100);
Otu1791	3	Bacteria(100);Firmicutes(100);Clostridia(100);Clostridiales(100);Lachnospiraceae(100);Lachnospiraceae_unclassified(100);
Otu1792	3	Bacteria(100);Firmicutes(100);Clostridia(100);Clostridiales(100);Ruminococcaceae(100);Ruminococcaceae_unclassified(100);
Otu1793	3	Bacteria(100);Firmicutes(100);Bacilli(100);Lactobacillales(100);Lactobacillaceae(100);Lactobacillus(100);
Otu1794	3	Bacteria(100);Firmicutes(100);Clostridia(100);Clostridiales(100);Ruminococcaceae(100);Ruminococcaceae_unclassified(100);
Otu1795	3	Bacteria(100);Firmicutes(100);Clostridia(100);Clostridiales(100);Ruminococcaceae(67);Ruminococcaceae_unclassified(67);
Otu1796	3	Bacteria(100);Bacteroidetes(100);Bacteroidia(67);Bacteroidales(67);Porphyromonadaceae(67);Porphyromonadaceae_unclassified(67);
Otu1797	3	Bacteria(100);Firmicutes(100);Clostridia(100);Clostridiales(100);Lachnospiraceae(100);Lachnospiraceae_unclassified(100);
Otu1798	3	Bacteria(100);Bacteroidetes(100);Bacteroidia(100);Bacteroidales(100);Porphyromonadaceae(100);Porphyromonadaceae_unclassified(100);
Otu1799	3	Bacteria(100);Firmicutes(100);Clostridia(100);Clostridiales(100);Lachnospiraceae(67);Lachnospiraceae_unclassified(67);
Otu1800	3	Bacteria(100);Firmicutes(100);Clostridia(100);Clostridiales(100);Ruminococcaceae(100);Ruminococcaceae_unclassified(100);
Otu1801	3	Bacteria(100);Firmicutes(100);Clostridia(100);Clostridiales(100);Lachnospiraceae(100);Lachnospiraceae_unclassified(67);
Otu1802	3	Bacteria(100);Proteobacteria(100);Gammaproteobacteria(100);Enterobacteriales(100);Enterobacteriaceae(100);Enterobacteriaceae_unclassified(100);
Otu1803	3	Bacteria(100);Actinobacteria(100);Actinobacteria(100);Coriobacteriales(100);Coriobacteriaceae(100);Coriobacteriaceae_unclassified(100);
Otu1804	3	Bacteria(100);Firmicutes(100);Clostridia(100);Clostridiales(100);Lachnospiraceae(100);Lachnospiraceae_unclassified(100);
Otu1805	3	Bacteria(100);Firmicutes(100);Clostridia(100);Clostridiales(100);Lachnospiraceae(100);Lachnospiraceae_unclassified(100);
Otu1806	3	Bacteria(100);Firmicutes(100);Clostridia(100);Clostridiales(100);Lachnospiraceae(100);Lachnospiraceae_unclassified(100);
Otu1807	3	Bacteria(100);Firmicutes(100);Clostridia(100);Clostridiales(100);Lachnospiraceae(100);Lachnospiraceae_unclassified(100);
Otu1808	3	Bacteria(100);Firmicutes(100);Clostridia(100);Clostridiales(100);Lachnospiraceae(100);Acetatifactor(100);
Otu1809	3	Bacteria(100);Firmicutes(100);Clostridia(100);Clostridiales(100);Lachnospiraceae(100);Lachnospiraceae_unclassified(100);
Otu1810	3	Bacteria(100);Firmicutes(100);Clostridia(100);Clostridiales(100);Lachnospiraceae(100);Lachnospiraceae_unclassified(100);
Otu1811	3	Bacteria(100);Firmicutes(100);Clostridia(100);Clostridiales(100);Ruminococcaceae(100);Ruminococcaceae_unclassified(100);
Otu1812	3	Bacteria(100);Firmicutes(100);Clostridia(100);Clostridiales(100);Lachnospiraceae(100);Lachnospiraceae_unclassified(100);
Otu1813	3	Bacteria(100);Bacteroidetes(100);Flavobacteriia(100);Flavobacteriales(100);Flavobacteriaceae(100);Chryseobacterium(100);
Otu1814	3	Bacteria(100);Firmicutes(100);Clostridia(100);Clostridiales(100);Lachnospiraceae(67);Lachnospiraceae_unclassified(67);
Otu1815	3	Bacteria(100);Firmicutes(100);Clostridia(100);Clostridiales(100);Lachnospiraceae(100);Lachnospiraceae_unclassified(100);
Otu1816	3	Bacteria(100);Firmicutes(100);Clostridia(100);Clostridiales(100);Lachnospiraceae(100);Lachnospiraceae_unclassified(100);
Otu1817	3	Bacteria(100);Firmicutes(100);Clostridia(100);Clostridiales(100);Lachnospiraceae(100);Lachnospiraceae_unclassified(100);
Otu1818	3	Bacteria(100);Bacteroidetes(100);Bacteroidia(100);Bacteroidales(100);Porphyromonadaceae(100);Porphyromonadaceae_unclassified(100);
Otu1819	3	Bacteria(100);Firmicutes(100);Clostridia(100);Clostridiales(100);Lachnospiraceae(100);Lachnospiraceae_unclassified(100);
Otu1820	3	Bacteria(100);Bacteroidetes(100);Bacteroidia(100);Bacteroidales(100);Bacteroidaceae(100);Bacteroides(100);
Otu1821	3	Bacteria(100);Firmicutes(100);Clostridia(100);Clostridiales(100);Lachnospiraceae(100);Lachnospiraceae_unclassified(100);
Otu1822	3	Bacteria(100);Firmicutes(100);Clostridia(100);Clostridiales(100);Ruminococcaceae(100);Ruminococcaceae_unclassified(100);
Otu1823	3	Bacteria(100);Firmicutes(100);Clostridia(100);Clostridiales(100);Lachnospiraceae(100);Lachnospiraceae_unclassified(100);
Otu1824	3	Bacteria(100);Actinobacteria(100);Actinobacteria(100);Actinomycetales(100);Nakamurellaceae(100);Nakamurella(100);
Otu1825	3	Bacteria(100);Bacteroidetes(100);Sphingobacteriia(100);Sphingobacteriales(100);Aliifodinibius(100);Aliifodinibius_unclassified(100);
Otu1826	3	Bacteria(100);Bacteroidetes(100);Bacteroidetes_unclassified(67);Bacteroidetes_unclassified(67);Bacteroidetes_unclassified(67);Bacteroidetes_unclassified(67);
Otu1827	3	Bacteria(100);Firmicutes(100);Clostridia(100);Clostridiales(100);Lachnospiraceae(100);Clostridium_XlVa(67);
Otu1828	3	Bacteria(100);Firmicutes(100);Clostridia(100);Clostridiales(100);Lachnospiraceae(100);Lachnospiraceae_unclassified(100);
Otu1829	3	Bacteria(100);Firmicutes(100);Clostridia(100);Clostridiales(100);Ruminococcaceae(100);Pseudoflavonifractor(67);
Otu1830	3	Bacteria(100);Firmicutes(100);Clostridia(100);Clostridiales(100);Peptococcaceae_1(100);Desulfosporosinus(100);
Otu1831	3	Bacteria(100);Bacteroidetes(100);Bacteroidia(100);Bacteroidales(100);Porphyromonadaceae(100);Porphyromonadaceae_unclassified(100);
Otu1832	3	Bacteria(100);Firmicutes(100);Clostridia(100);Clostridiales(100);Lachnospiraceae(100);Lachnospiraceae_unclassified(100);
Otu1833	3	Bacteria(100);Bacteroidetes(100);Bacteroidia(100);Bacteroidales(100);Porphyromonadaceae(100);Porphyromonadaceae_unclassified(100);
Otu1834	3	Bacteria(100);Firmicutes(100);Clostridia(100);Clostridiales(100);Lachnospiraceae(100);Lachnospiraceae_unclassified(100);
Otu1835	3	Bacteria(100);Bacteroidetes(100);Bacteroidia(100);Bacteroidales(100);Porphyromonadaceae(100);Porphyromonadaceae_unclassified(100);
Otu1836	3	Bacteria(100);Bacteroidetes(100);Bacteroidia(100);Bacteroidales(100);Porphyromonadaceae(100);Porphyromonadaceae_unclassified(100);
Otu1837	3	Bacteria(100);Firmicutes(100);Clostridia(100);Clostridiales(100);Lachnospiraceae(100);Lachnospiraceae_unclassified(100);
Otu1838	3	Bacteria(100);Bacteroidetes(100);Bacteroidia(100);Bacteroidales(100);Porphyromonadaceae(100);Porphyromonadaceae_unclassified(100);
Otu1839	3	Bacteria(100);Firmicutes(100);Clostridia(100);Clostridiales(100);Ruminococcaceae(100);Oscillibacter(100);
Otu1840	3	Bacteria(100);Firmicutes(100);Clostridia(100);Clostridiales(100);Lachnospiraceae(100);Acetatifactor(100);
Otu1841	3	Bacteria(100);Bacteroidetes(100);Bacteroidia(100);Bacteroidales(100);Porphyromonadaceae(100);Porphyromonadaceae_unclassified(100);
Otu1842	3	Bacteria(100);Firmicutes(100);Clostridia(100);Clostridiales(100);Clostridiales_unclassified(100);Clostridiales_unclassified(100);
Otu1843	3	Bacteria(100);Firmicutes(100);Clostridia(100);Clostridiales(100);Clostridiales_Incertae_Sedis_XI(100);Clostridiales_Incertae_Sedis_XI_unclassified(100);
Otu1844	3	Bacteria(100);Firmicutes(100);Clostridia(100);Clostridiales(100);Ruminococcaceae(100);Oscillibacter(100);
Otu1845	3	Bacteria(100);Firmicutes(100);Clostridia(100);Clostridiales(100);Lachnospiraceae(100);Lachnospiraceae_unclassified(100);
Otu1846	3	Bacteria(100);Firmicutes(100);Clostridia(100);Clostridiales(100);Lachnospiraceae(100);Lachnospiraceae_unclassified(100);
Otu1847	3	Bacteria(100);Bacteroidetes(100);Bacteroidia(100);Bacteroidales(100);Porphyromonadaceae(100);Porphyromonadaceae_unclassified(100);
Otu1848	3	Bacteria(100);Firmicutes(100);Clostridia(100);Clostridiales(100);Lachnospiraceae(100);Acetatifactor(100);
Otu1849	3	Bacteria(100);Bacteroidetes(100);Bacteroidia(100);Bacteroidales(100);Porphyromonadaceae(100);Porphyromonadaceae_unclassified(100);
Otu1850	3	Bacteria(100);Firmicutes(100);Clostridia(100);Clostridiales(100);Lachnospiraceae(100);Lachnospiraceae_unclassified(100);
Otu1851	3	Bacteria(100);Firmicutes(100);Clostridia(100);Clostridiales(100);Lachnospiraceae(100);Lachnospiraceae_unclassified(100);
Otu1852	3	Bacteria(100);Firmicutes(100);Clostridia(100);Clostridiales(100);Lachnospiraceae(100);Clostridium_XlVa(100);
Otu1853	3	Bacteria(100);Firmicutes(100);Firmicutes_unclassified(67);Firmicutes_unclassified(67);Firmicutes_unclassified(67);Firmicutes_unclassified(67);
Otu1854	3	Bacteria(100);Firmicutes(100);Clostridia(100);Clostridiales(100);Lachnospiraceae(100);Lachnospiraceae_unclassified(100);
Otu1855	3	Bacteria(100);Firmicutes(100);Firmicutes_unclassified(100);Firmicutes_unclassified(100);Firmicutes_unclassified(100);Firmicutes_unclassified(100);
Otu1856	3	Bacteria(100);Firmicutes(100);Clostridia(100);Clostridiales(100);Ruminococcaceae(100);Ruminococcaceae_unclassified(100);
Otu1857	3	Bacteria(100);Firmicutes(100);Clostridia(100);Clostridiales(100);Lachnospiraceae(100);Lachnospiraceae_unclassified(100);
Otu1858	3	Bacteria(100);Bacteroidetes(100);Bacteroidia(100);Bacteroidales(100);Porphyromonadaceae(100);Porphyromonadaceae_unclassified(100);
Otu1859	3	Bacteria(100);Firmicutes(100);Clostridia(100);Clostridiales(100);Lachnospiraceae(100);Lachnospiraceae_unclassified(100);
Otu1860	3	Bacteria(100);Firmicutes(100);Clostridia(100);Clostridiales(100);Lachnospiraceae(100);Lachnospiraceae_unclassified(100);
Otu1861	3	Bacteria(100);Firmicutes(100);Clostridia(100);Clostridiales(100);Clostridiales_unclassified(100);Clostridiales_unclassified(100);
Otu1862	3	Bacteria(100);Firmicutes(100);Bacilli(100);Bacillales(100);Bacillales_unclassified(100);Bacillales_unclassified(100);
Otu1863	3	Bacteria(100);Firmicutes(100);Clostridia(100);Clostridiales(100);Lachnospiraceae(100);Lachnospiraceae_unclassified(100);
Otu1864	3	Bacteria(100);Bacteroidetes(100);Bacteroidia(100);Bacteroidales(100);Porphyromonadaceae(100);Porphyromonadaceae_unclassified(100);
Otu1865	3	Bacteria(100);Acidobacteria(100);Acidobacteria_Gp4(100);Acidobacteria_Gp4_unclassified(100);Acidobacteria_Gp4_unclassified(100);Acidobacteria_Gp4_unclassified(100);
Otu1866	3	Bacteria(100);Firmicutes(100);Clostridia(100);Clostridiales(100);Lachnospiraceae(67);Lachnospiraceae_unclassified(67);
Otu1867	3	Bacteria(100);Bacteroidetes(100);Bacteroidia(100);Bacteroidales(100);Porphyromonadaceae(100);Porphyromonadaceae_unclassified(100);
Otu1868	3	Bacteria(100);Firmicutes(100);Clostridia(100);Clostridiales(100);Lachnospiraceae(100);Lachnospiraceae_unclassified(100);
Otu1869	3	Bacteria(100);Firmicutes(100);Clostridia(100);Clostridiales(100);Lachnospiraceae(100);Lachnospiraceae_unclassified(100);
Otu1870	3	Bacteria(100);Firmicutes(100);Firmicutes_unclassified(100);Firmicutes_unclassified(100);Firmicutes_unclassified(100);Firmicutes_unclassified(100);
Otu1871	3	Bacteria(100);Firmicutes(100);Clostridia(100);Clostridiales(100);Ruminococcaceae(100);Ruminococcaceae_unclassified(100);
Otu1872	3	Bacteria(100);Firmicutes(100);Clostridia(100);Clostridiales(100);Lachnospiraceae(67);Lachnospiraceae_unclassified(67);
Otu1873	3	Bacteria(100);Bacteroidetes(100);Bacteroidia(100);Bacteroidales(100);Porphyromonadaceae(100);Porphyromonadaceae_unclassified(100);
Otu1874	3	Bacteria(100);Bacteroidetes(100);Bacteroidia(100);Bacteroidales(100);Porphyromonadaceae(100);Porphyromonadaceae_unclassified(100);
Otu1875	3	Bacteria(100);Firmicutes(100);Clostridia(100);Clostridiales(100);Lachnospiraceae(67);Lachnospiraceae_unclassified(67);
Otu1876	3	Bacteria(100);Firmicutes(100);Clostridia(100);Clostridiales(100);Ruminococcaceae(100);Ruminococcaceae_unclassified(100);
Otu1877	3	Bacteria(100);Firmicutes(100);Clostridia(100);Clostridiales(100);Lachnospiraceae(100);Lachnospiraceae_unclassified(67);
Otu1878	3	Bacteria(100);Firmicutes(100);Clostridia(100);Clostridiales(100);Lachnospiraceae(100);Lachnospiraceae_unclassified(100);
Otu1879	3	Bacteria(100);Firmicutes(100);Clostridia(100);Clostridiales(100);Lachnospiraceae(100);Lachnospiraceae_unclassified(100);
Otu1880	3	Bacteria(100);Bacteroidetes(100);Bacteroidia(100);Bacteroidales(100);Porphyromonadaceae(100);Porphyromonadaceae_unclassified(100);
Otu1881	3	Bacteria(100);Firmicutes(100);Clostridia(100);Clostridiales(100);Lachnospiraceae(100);Lachnospiraceae_unclassified(67);
Otu1882	3	Bacteria(100);Firmicutes(100);Clostridia(100);Clostridiales(100);Lachnospiraceae(100);Lachnospiraceae_unclassified(100);
Otu1883	3	Bacteria(100);Firmicutes(100);Clostridia(100);Clostridiales(100);Ruminococcaceae(100);Clostridium_IV(100);
Otu1884	3	Bacteria(100);Firmicutes(100);Clostridia(100);Clostridiales(100);Ruminococcaceae(100);Ruminococcaceae_unclassified(100);
Otu1885	3	Bacteria(100);Bacteroidetes(100);Bacteroidia(100);Bacteroidales(100);Porphyromonadaceae(100);Porphyromonadaceae_unclassified(67);
Otu1886	3	Bacteria(100);Firmicutes(100);Clostridia(100);Clostridiales(100);Lachnospiraceae(100);Lachnospiraceae_unclassified(100);
Otu1887	3	Bacteria(100);Firmicutes(100);Clostridia(100);Clostridiales(100);Lachnospiraceae(67);Lachnospiraceae_unclassified(67);
Otu1888	3	Bacteria(100);Firmicutes(100);Clostridia(100);Clostridiales(100);Clostridiales_unclassified(100);Clostridiales_unclassified(100);
Otu1889	3	Bacteria(100);Firmicutes(100);Clostridia(100);Clostridiales(100);Lachnospiraceae(100);Lachnospiraceae_unclassified(100);
Otu1890	3	Bacteria(100);Firmicutes(100);Clostridia(100);Clostridiales(100);Lachnospiraceae(100);Lachnospiraceae_unclassified(100);
Otu1891	3	Bacteria(100);Firmicutes(100);Clostridia(100);Clostridiales(100);Lachnospiraceae(100);Lachnospiraceae_unclassified(100);
Otu1892	3	Bacteria(100);Firmicutes(100);Clostridia(100);Clostridiales(100);Lachnospiraceae(100);Lachnospiraceae_unclassified(100);
Otu1893	3	Bacteria(100);Firmicutes(100);Clostridia(100);Clostridiales(100);Lachnospiraceae(100);Lachnospiraceae_unclassified(100);
Otu1894	3	Bacteria(100);Firmicutes(100);Erysipelotrichia(100);Erysipelotrichales(100);Erysipelotrichaceae(100);Turicibacter(100);
Otu1895	3	Bacteria(100);Bacteroidetes(100);Bacteroidia(100);Bacteroidales(100);Porphyromonadaceae(100);Porphyromonadaceae_unclassified(100);
Otu1896	3	Bacteria(100);Firmicutes(100);Clostridia(100);Clostridiales(100);Lachnospiraceae(100);Lachnospiraceae_unclassified(100);
Otu1897	3	Bacteria(100);Bacteroidetes(100);Bacteroidia(100);Bacteroidales(100);Porphyromonadaceae(67);Porphyromonadaceae_unclassified(67);
Otu1898	3	Bacteria(100);Firmicutes(100);Clostridia(100);Clostridiales(100);Ruminococcaceae(100);Ruminococcaceae_unclassified(100);
Otu1899	3	Bacteria(100);Firmicutes(100);Bacilli(100);Lactobacillales(100);Lactobacillaceae(100);Lactobacillus(100);
Otu1900	3	Bacteria(100);Bacteria_unclassified(67);Bacteria_unclassified(67);Bacteria_unclassified(67);Bacteria_unclassified(67);Bacteria_unclassified(67);
Otu1901	3	Bacteria(100);Bacteroidetes(100);Bacteroidia(100);Bacteroidales(100);Porphyromonadaceae(100);Porphyromonadaceae_unclassified(100);
Otu1902	3	Bacteria(100);Bacteroidetes(100);Flavobacteriia(100);Flavobacteriales(100);Flavobacteriaceae(100);Empedobacter(100);
Otu1903	3	Bacteria(100);Firmicutes(100);Clostridia(100);Clostridiales(100);Lachnospiraceae(100);Lachnospiraceae_unclassified(100);
Otu1904	3	Bacteria(100);Actinobacteria(100);Actinobacteria_unclassified(100);Actinobacteria_unclassified(100);Actinobacteria_unclassified(100);Actinobacteria_unclassified(100);
Otu1905	3	Bacteria(100);Firmicutes(100);Clostridia(100);Clostridiales(100);Lachnospiraceae(100);Lachnospiraceae_unclassified(100);
Otu1906	3	Bacteria(100);Firmicutes(100);Clostridia(100);Clostridiales(100);Lachnospiraceae(100);Lachnospiraceae_unclassified(100);
Otu1907	3	Bacteria(100);Bacteroidetes(100);Bacteroidia(100);Bacteroidales(100);Bacteroidales_unclassified(100);Bacteroidales_unclassified(100);
Otu1908	3	Bacteria(100);Firmicutes(100);Clostridia(100);Clostridiales(100);Clostridiaceae_1(100);Clostridiaceae_1_unclassified(67);
Otu1909	3	Bacteria(100);Firmicutes(100);Clostridia(100);Clostridiales(100);Lachnospiraceae(100);Lachnospiraceae_unclassified(100);
Otu1910	3	Bacteria(100);Firmicutes(100);Clostridia(100);Clostridiales(100);Lachnospiraceae(100);Lachnospiraceae_unclassified(100);
Otu1911	3	Bacteria(100);Firmicutes(100);Clostridia(100);Clostridiales(100);Ruminococcaceae(100);Ruminococcaceae_unclassified(100);
Otu1912	3	Bacteria(100);Firmicutes(100);Clostridia(100);Clostridiales(100);Lachnospiraceae(67);Lachnospiraceae_unclassified(67);
Otu1913	3	Bacteria(100);Firmicutes(100);Clostridia(100);Clostridiales(100);Lachnospiraceae(100);Lachnospiraceae_unclassified(100);
Otu1914	3	Bacteria(100);Actinobacteria(100);Actinobacteria(100);Coriobacteriales(100);Coriobacteriaceae(100);Asaccharobacter(100);
Otu1915	3	Bacteria(100);Proteobacteria(100);Gammaproteobacteria(100);Enterobacteriales(100);Enterobacteriaceae(100);Enterobacteriaceae_unclassified(100);
Otu1916	3	Bacteria(100);Firmicutes(100);Clostridia(100);Clostridiales(100);Lachnospiraceae(100);Lachnospiraceae_unclassified(100);
Otu1917	3	Bacteria(100);Proteobacteria(100);Alphaproteobacteria(100);Rhodospirillales(100);Rhodospirillaceae(100);Magnetospirillum(100);
Otu1918	3	Bacteria(100);Firmicutes(100);Clostridia(100);Clostridiales(100);Lachnospiraceae(100);Lachnospiraceae_unclassified(100);
Otu1919	3	Bacteria(100);Firmicutes(100);Clostridia(100);Clostridiales(100);Lachnospiraceae(100);Lachnospiraceae_unclassified(100);
Otu1920	3	Bacteria(100);Firmicutes(100);Clostridia(100);Clostridiales(100);Lachnospiraceae(100);Lachnospiraceae_unclassified(100);
Otu1921	3	Bacteria(100);Firmicutes(100);Clostridia(100);Clostridiales(100);Lachnospiraceae(100);Lachnospiraceae_unclassified(100);
Otu1922	3	Bacteria(100);Bacteroidetes(100);Bacteroidia(100);Bacteroidales(100);Porphyromonadaceae(100);Porphyromonadaceae_unclassified(100);
Otu1923	3	Bacteria(100);Firmicutes(100);Clostridia(100);Clostridiales(100);Lachnospiraceae(100);Lachnospiraceae_unclassified(100);
Otu1924	3	Bacteria(100);Firmicutes(100);Clostridia(100);Clostridiales(100);Clostridiales_unclassified(100);Clostridiales_unclassified(100);
Otu1925	3	Bacteria(100);Firmicutes(100);Bacilli(100);Bacillales(100);Bacillaceae_2(100);Bacillaceae_2_unclassified(100);
Otu1926	3	Bacteria(100);Bacteroidetes(100);Bacteroidia(100);Bacteroidales(100);Porphyromonadaceae(100);Porphyromonadaceae_unclassified(100);
Otu1927	3	Bacteria(100);Firmicutes(100);Clostridia(100);Clostridiales(100);Lachnospiraceae(100);Lachnospiraceae_unclassified(100);
Otu1928	3	Bacteria(100);Bacteroidetes(100);Bacteroidia(100);Bacteroidales(100);Porphyromonadaceae(100);Porphyromonadaceae_unclassified(100);
Otu1929	3	Bacteria(100);Firmicutes(100);Bacilli(100);Bacillales(100);Paenibacillaceae_1(100);Paenibacillaceae_1_unclassified(100);
Otu1930	3	Bacteria(100);Bacteroidetes(100);Bacteroidia(67);Bacteroidales(67);Porphyromonadaceae(67);Porphyromonadaceae_unclassified(67);
Otu1931	3	Bacteria(100);Firmicutes(100);Clostridia(100);Clostridiales(100);Lachnospiraceae(100);Lachnospiraceae_unclassified(100);
Otu1932	3	Bacteria(100);Firmicutes(100);Bacilli(100);Lactobacillales(100);Lactobacillales_unclassified(67);Lactobacillales_unclassified(67);
Otu1933	3	Bacteria(100);Firmicutes(100);Clostridia(100);Clostridiales(100);Clostridiales_unclassified(100);Clostridiales_unclassified(100);
Otu1934	3	Bacteria(100);Bacteroidetes(100);Bacteroidia(100);Bacteroidales(100);Porphyromonadaceae(100);Porphyromonadaceae_unclassified(100);
Otu1935	3	Bacteria(100);Firmicutes(100);Clostridia(100);Clostridiales(100);Clostridiales_unclassified(67);Clostridiales_unclassified(67);
Otu1936	3	Bacteria(100);Bacteroidetes(100);Bacteroidia(100);Bacteroidales(100);Porphyromonadaceae(100);Porphyromonadaceae_unclassified(100);
Otu1937	3	Bacteria(100);Firmicutes(100);Clostridia(100);Clostridiales(100);Lachnospiraceae(100);Lachnospiraceae_unclassified(100);
Otu1938	3	Bacteria(100);Firmicutes(100);Clostridia(100);Clostridiales(100);Lachnospiraceae(100);Lachnospiraceae_unclassified(100);
Otu1939	3	Bacteria(100);Firmicutes(100);Clostridia(100);Clostridiales(100);Lachnospiraceae(100);Lachnospiraceae_unclassified(100);
Otu1940	3	Bacteria(100);Firmicutes(100);Clostridia(100);Clostridiales(100);Clostridiales_unclassified(67);Clostridiales_unclassified(67);
Otu1941	3	Bacteria(100);Bacteroidetes(100);Bacteroidia(100);Bacteroidales(100);Porphyromonadaceae(100);Porphyromonadaceae_unclassified(100);
Otu1942	3	Bacteria(100);Firmicutes(100);Firmicutes_unclassified(100);Firmicutes_unclassified(100);Firmicutes_unclassified(100);Firmicutes_unclassified(100);
Otu1943	3	Bacteria(100);Firmicutes(100);Clostridia(100);Clostridiales(100);Lachnospiraceae(67);Lachnospiraceae_unclassified(67);
Otu1944	3	Bacteria(100);Firmicutes(100);Clostridia(100);Clostridiales(100);Lachnospiraceae(100);Lachnospiraceae_unclassified(100);
Otu1945	3	Bacteria(100);Actinobacteria(100);Actinobacteria(100);Coriobacteriales(100);Coriobacteriaceae(100);Olsenella(100);
Otu1946	3	Bacteria(100);Firmicutes(100);Clostridia(100);Clostridiales(100);Lachnospiraceae(100);Lachnospiraceae_unclassified(100);
Otu1947	3	Bacteria(100);Firmicutes(100);Clostridia(100);Clostridiales(100);Ruminococcaceae(100);Ruminococcaceae_unclassified(100);
Otu1948	3	Bacteria(100);Bacteroidetes(100);Bacteroidia(100);Bacteroidales(100);Porphyromonadaceae(100);Porphyromonadaceae_unclassified(100);
Otu1949	3	Bacteria(100);Firmicutes(100);Clostridia(100);Clostridiales(100);Lachnospiraceae(100);Lachnospiraceae_unclassified(100);
Otu1950	3	Bacteria(100);Firmicutes(100);Clostridia(100);Clostridiales(100);Lachnospiraceae(100);Lachnospiraceae_unclassified(100);
Otu1951	3	Bacteria(100);Bacteroidetes(100);Bacteroidetes_unclassified(67);Bacteroidetes_unclassified(67);Bacteroidetes_unclassified(67);Bacteroidetes_unclassified(67);
Otu1952	3	Bacteria(100);Proteobacteria(100);Alphaproteobacteria(100);Rhodospirillales(100);Acetobacteraceae(100);Roseomonas(100);
Otu1953	3	Bacteria(100);Firmicutes(100);Clostridia(100);Clostridiales(100);Lachnospiraceae(100);Lachnospiraceae_unclassified(100);
Otu1954	3	Bacteria(100);Proteobacteria(100);Gammaproteobacteria(100);Enterobacteriales(100);Enterobacteriaceae(100);Enterobacteriaceae_unclassified(100);
Otu1955	3	Bacteria(100);Firmicutes(100);Clostridia(100);Clostridiales(100);Clostridiales_Incertae_Sedis_XI(100);Tissierella(100);
Otu1956	3	Bacteria(100);Firmicutes(100);Firmicutes_unclassified(100);Firmicutes_unclassified(100);Firmicutes_unclassified(100);Firmicutes_unclassified(100);
Otu1957	3	Bacteria(100);Bacteroidetes(100);Bacteroidia(100);Bacteroidales(100);Porphyromonadaceae(100);Porphyromonadaceae_unclassified(100);
Otu1958	3	Bacteria(100);Firmicutes(100);Clostridia(100);Clostridiales(100);Peptostreptococcaceae(100);Romboutsia(67);
Otu1959	3	Bacteria(100);Bacteroidetes(100);Bacteroidia(100);Bacteroidales(100);Porphyromonadaceae(100);Porphyromonadaceae_unclassified(100);
Otu1960	3	Bacteria(100);Firmicutes(100);Clostridia(100);Clostridiales(100);Lachnospiraceae(100);Blautia(67);
Otu1961	3	Bacteria(100);Firmicutes(100);Firmicutes_unclassified(100);Firmicutes_unclassified(100);Firmicutes_unclassified(100);Firmicutes_unclassified(100);
Otu1962	3	Bacteria(100);Bacteria_unclassified(100);Bacteria_unclassified(100);Bacteria_unclassified(100);Bacteria_unclassified(100);Bacteria_unclassified(100);
Otu1963	3	Bacteria(100);Actinobacteria(100);Actinobacteria(100);Coriobacteriales(100);Coriobacteriaceae(100);Asaccharobacter(67);
Otu1964	3	Bacteria(100);Firmicutes(100);Bacilli(100);Lactobacillales(100);Leuconostocaceae(100);Weissella(100);
Otu1965	3	Bacteria(100);Firmicutes(100);Clostridia(100);Clostridiales(100);Lachnospiraceae(67);Lachnospiraceae_unclassified(67);
Otu1966	3	Bacteria(100);Firmicutes(100);Clostridia(100);Clostridiales(100);Lachnospiraceae(100);Lachnospiraceae_unclassified(100);
Otu1967	3	Bacteria(100);Bacteroidetes(100);Bacteroidia(100);Bacteroidales(100);Porphyromonadaceae(100);Porphyromonadaceae_unclassified(100);
Otu1968	3	Bacteria(100);Bacteroidetes(100);Bacteroidia(100);Bacteroidales(100);Porphyromonadaceae(67);Porphyromonadaceae_unclassified(67);
Otu1969	3	Bacteria(100);Firmicutes(100);Clostridia(100);Clostridiales(100);Lachnospiraceae(100);Lachnospiraceae_unclassified(100);
Otu1970	3	Bacteria(100);Firmicutes(100);Clostridia(100);Clostridiales(100);Lachnospiraceae(100);Lachnospiraceae_unclassified(100);
Otu1971	3	Bacteria(100);Firmicutes(100);Clostridia(100);Clostridiales(100);Lachnospiraceae(100);Lachnospiraceae_unclassified(100);
Otu1972	3	Bacteria(100);Proteobacteria(100);Alphaproteobacteria(100);Rhizobiales(100);Hyphomicrobiaceae(100);Devosia(100);
Otu1973	3	Bacteria(100);Firmicutes(100);Bacilli(100);Lactobacillales(100);Streptococcaceae(100);Streptococcus(100);
Otu1974	3	Bacteria(100);Firmicutes(100);Firmicutes_unclassified(100);Firmicutes_unclassified(100);Firmicutes_unclassified(100);Firmicutes_unclassified(100);
Otu1975	3	Bacteria(100);Firmicutes(100);Clostridia(100);Clostridiales(100);Lachnospiraceae(100);Lachnospiraceae_unclassified(100);
Otu1976	3	Bacteria(100);Firmicutes(100);Clostridia(100);Clostridiales(100);Lachnospiraceae(100);Lachnospiraceae_unclassified(100);
Otu1977	3	Bacteria(100);Proteobacteria(100);Gammaproteobacteria(100);Enterobacteriales(100);Enterobacteriaceae(100);Enterobacteriaceae_unclassified(100);
Otu1978	3	Bacteria(100);Bacteroidetes(67);Bacteroidia(67);Bacteroidales(67);Bacteroidales_unclassified(67);Bacteroidales_unclassified(67);
Otu1979	3	Bacteria(100);Firmicutes(100);Clostridia(100);Clostridiales(100);Clostridiales_unclassified(100);Clostridiales_unclassified(100);
Otu1980	3	Bacteria(100);Firmicutes(100);Clostridia(100);Clostridiales(100);Lachnospiraceae(100);Lachnospiraceae_unclassified(67);
Otu1981	3	Bacteria(100);Firmicutes(100);Bacilli(100);Lactobacillales(100);Enterococcaceae(67);Enterococcaceae_unclassified(67);
Otu1982	3	Bacteria(100);Firmicutes(100);Clostridia(100);Clostridiales(100);Clostridiales_unclassified(100);Clostridiales_unclassified(100);
Otu1983	3	Bacteria(100);Firmicutes(100);Clostridia(100);Clostridiales(100);Lachnospiraceae(100);Lachnospiraceae_unclassified(100);
Otu1984	3	Bacteria(100);Firmicutes(100);Clostridia(100);Clostridiales(100);Ruminococcaceae(100);Ruminococcaceae_unclassified(100);
Otu1985	3	Bacteria(100);Firmicutes(100);Clostridia(100);Clostridiales(100);Lachnospiraceae(100);Lachnospiraceae_unclassified(100);
Otu1986	3	Bacteria(100);Firmicutes(100);Bacilli(100);Bacillales(100);Bacillaceae_2(100);Bacillaceae_2_unclassified(100);
Otu1987	3	Bacteria(100);Firmicutes(100);Clostridia(100);Clostridiales(100);Peptostreptococcaceae(100);Romboutsia(100);
Otu1988	3	Bacteria(100);Firmicutes(100);Clostridia(100);Clostridiales(100);Lachnospiraceae(100);Lachnospiraceae_unclassified(100);
Otu1989	3	Bacteria(100);Firmicutes(100);Bacilli(100);Lactobacillales(100);Lactobacillales_unclassified(100);Lactobacillales_unclassified(100);
Otu1990	3	Bacteria(100);Proteobacteria(100);Alphaproteobacteria(100);Rhizobiales(100);Beijerinckiaceae(100);Camelimonas(100);
Otu1991	3	Bacteria(100);Firmicutes(100);Clostridia(100);Clostridiales(100);Lachnospiraceae(100);Lachnospiraceae_unclassified(100);
Otu1992	3	Bacteria(100);Bacteroidetes(100);Bacteroidia(100);Bacteroidales(100);Porphyromonadaceae(67);Porphyromonadaceae_unclassified(67);
Otu1993	3	Bacteria(100);Firmicutes(100);Clostridia(100);Clostridiales(100);Clostridiales_unclassified(100);Clostridiales_unclassified(100);
Otu1994	3	Bacteria(100);Firmicutes(100);Erysipelotrichia(67);Erysipelotrichales(67);Erysipelotrichaceae(67);Turicibacter(67);
Otu1995	3	Bacteria(100);Bacteroidetes(100);Bacteroidia(100);Bacteroidales(100);Porphyromonadaceae(67);Porphyromonadaceae_unclassified(67);
Otu1996	3	Bacteria(100);Bacteroidetes(100);Cytophagia(100);Cytophagales(100);Cytophagaceae(100);Spirosoma(100);
Otu1997	3	Bacteria(100);Firmicutes(100);Clostridia(100);Clostridiales(100);Lachnospiraceae(100);Dorea(67);
Otu1998	3	Bacteria(100);Bacteroidetes(100);Bacteroidia(100);Bacteroidales(100);Porphyromonadaceae(100);Porphyromonadaceae_unclassified(100);
[truncated: 3,140 more rows]

## Sheet: Realtive abundance
16S rRNA gene sequncing data summary
Label	Day	Sample	Group	Gender	nseqs	coverage	sobs	invsimpson	invsimpson_lci	invsimpson_hci	Otu0001	Otu0002	Otu0003	Otu0004	Otu0005	Otu0006	Otu0007	Otu0008	Otu0009	Otu0010	Otu0011	Otu0012	Otu0013	Otu0014	Otu0015	Otu0016	Otu0017	Otu0018	Otu0019	Otu0020	Otu0021	Otu0022	Otu0023	Otu0024	Otu0025	Otu0026	Otu0027	Otu0028	Otu0029	Otu0030	Otu0031	Otu0032	Otu0033	Otu0034	Otu0035	Otu0036	Otu0037	Otu0038	Otu0039
M188_D0	0	M188	RB07	M	2561	0.985162	114	9.76593	9.18039	10.4312	0.00117142	0.0616947	0.0859039	0.217493	0.183522	0.00898087	0.0425615	0	0	0	0.0070285	0.00624756	0	0.00937134	0.000390472	0	0.0144475	0	0	0.0296759	0	0.000780945	0.0121046	0.0394377	0	0.00156189	0.00780945	0.0367044	0	0	0.00351425	0	0.00195236	0.0042952	0.00390472	0.000390472	0.00507614	0.0242093	0.0160094
M189_D0	0	M189	RB07	M	2561	0.985162	140	7.56674	7.01473	8.21306	0	0.0862944	0.111675	0.32214	0.0449043	0.00780945	0.0452948	0	0	0	0.00624756	0.0183522	0	0.00546661	0.00546661	0	0.00898087	0	0	0.0269426	0.0121046	0	0.0152284	0.000780945	0	0.00234283	0.0160094	0	0.00312378	0	0.00663803	0.00195236	0.00156189	0.00234283	0.00195236	0.00156189	0	0.00468567	0.00546661
M190_D0	0	M190	RB07	M	2561	0.980086	124	7.94569	7.43743	8.5285	0.000390472	0.0968372	0.0515424	0.290902	0.123389	0.0456853	0.0773135	0	0	0.000390472	0.00585709	0.028895	0	0.00741898	0.000780945	0	0.00468567	0	0	0.0187427	0.00234283	0	0.0136665	0.00117142	0	0.000780945	0.00390472	0	0.000390472	0	0.000390472	0.0042952	0.00312378	0.000390472	0.00780945	0.00312378	0.00156189	0.0070285	0.0218665
M191_D0	0	M191	RB07	F	2561	0.984772	152	15.8318	14.5142	17.4125	0.000780945	0.203827	0.0406091	0	0.042952	0.0859039	0.0511519	0	0	0.00273331	0.0245998	0.0351425	0	0.0234283	0.0144475	0.000390472	0.00234283	0	0	0.0249902	0.0175713	0.0245998	0.00976181	0.00390472	0	0	0.0042952	0.00195236	0.0171808	0	0.020695	0.0109332	0.000780945	0.000780945	0.00351425	0.0132761	0	0.000780945	0.0218665
M192_D0	0	M192	RB07	F	2561	0.984772	130	6.9987	6.52829	7.54217	0.00624756	0.326435	0.101523	0.00390472	0.00741898	0.126904	0.0620851	0	0	0.000780945	0.0152284	0.00937134	0	0.014057	0.00390472	0	0.0203046	0	0	0.0156189	0.00976181	0.0581804	0.0273331	0	0	0.00195236	0.00468567	0	0.00312378	0	0.00468567	0.00351425	0.00195236	0.00156189	0.00195236	0.00156189	0.000390472	0.00117142	0.000390472
M193_D0	0	M193	RB07	F	2561	0.986724	154	17.0113	15.8811	18.3147	0.000780945	0.134713	0.142522	0.00273331	0	0.0577899	0.00624756	0	0	0.00273331	0.0105428	0.0101523	0	0.0183522	0.00898087	0.00117142	0.00156189	0	0	0.0187427	0.0378758	0.0109332	0.028114	0	0.000780945	0.00937134	0.00898087	0	0.0179617	0	0.070285	0.0285045	0.00312378	0.00273331	0.00624756	0.00546661	0.000780945	0.00859039	0.00898087
M200_D0	0	M200	RB07	M	2561	0.982038	120	10.3328	9.74881	10.9912	0.000390472	0.133542	0.0706755	0.201874	0.156579	0.028114	0.0398282	0	0	0.00117142	0.0105428	0.00898087	0	0.0070285	0	0.000390472	0.00976181	0	0	0.0117142	0.000780945	0.00663803	0.00741898	0.00117142	0	0.00273331	0.000780945	0.0480281	0.000390472	0	0.00156189	0.00390472	0	0.000780945	0.0245998	0.00195236	0.0312378	0.0273331	0.0117142
M201_D0	0	M201	RB07	M	2561	0.984381	130	9.44044	8.86296	10.0984	0.000390472	0.0905896	0.0804373	0.237798	0.161656	0.063647	0.0242093	0	0	0.00156189	0.00898087	0.014057	0	0.0070285	0.00195236	0	0.00195236	0	0	0.0374854	0.000390472	0.00195236	0.0195236	0.0101523	0	0.00741898	0.00234283	0.00273331	0.00117142	0	0	0.00663803	0.00117142	0.00156189	0.00624756	0	0.00663803	0.0327997	0.00273331
M202_D0	0	M202	RB07	M	2561	0.980867	165	13.2488	12.2362	14.4442	0	0.110894	0.102694	0.213198	0.0199141	0.0156189	0.0210855	0	0	0.00585709	0.00780945	0.0394377	0	0.0128856	0.0210855	0	0.00507614	0	0	0.0398282	0.00312378	0.00390472	0.00468567	0.00507614	0	0.0124951	0.0105428	0.0121046	0.0128856	0	0.00273331	0.0117142	0.00976181	0.00195236	0.00273331	0	0.0042952	0	0.000780945
M203_D0	0	M203	RB07	M	2561	0.984772	112	10.7713	10.2124	11.395	0.000390472	0.111675	0.0866849	0.162046	0.180789	0.0816087	0.0491995	0	0	0.00780945	0.00507614	0.00390472	0	0.00741898	0.00117142	0	0.00156189	0	0	0.0132761	0.000390472	0.00976181	0.014838	0.0105428	0	0.00234283	0.000390472	0.0488091	0.000390472	0	0.000390472	0.00507614	0	0.000390472	0.0183522	0	0.014057	0.0257712	0.0156189
M204_D0	0	M204	RB07	M	2561	0.982429	127	9.07887	8.49729	9.74591	0	0.114408	0.108942	0.259664	0.110113	0.0300664	0.0277235	0	0	0.00507614	0.00273331	0.0300664	0	0.00273331	0.00195236	0.000390472	0.00624756	0	0	0.0163998	0	0.00741898	0.0191332	0.00351425	0	0.00780945	0.00741898	0.0238188	0.000390472	0	0.000390472	0.00195236	0.000390472	0.00195236	0.0113237	0	0.0324092	0.00546661	0.000780945
M205_D0	0	M205	RB07	M	2561	0.982429	175	21.7528	19.8309	24.0871	0	0.167903	0.0745802	0	0.0160094	0.0199141	0.0417806	0	0	0.00937134	0.0367044	0.0253807	0	0.00156189	0.021476	0	0.00195236	0	0	0.0386568	0.0042952	0.0101523	0.00937134	0	0	0.00117142	0.0167903	0.00117142	0.0128856	0	0.0222569	0.00156189	0.00507614	0.0101523	0.00390472	0.0312378	0.00351425	0.000390472	0.00234283
M206_D0	0	M206	RB07	F	2561	0.979305	169	12.213	11.2384	13.3727	0	0.235845	0.110113	0	0.00546661	0.0245998	0.0870754	0	0	0.0253807	0.0222569	0.0117142	0	0.020695	0.00937134	0	0.00351425	0.000390472	0	0.0363139	0.000780945	0.0124951	0.00780945	0	0	0.0109332	0.00585709	0.00117142	0.00117142	0	0.000780945	0.00468567	0.00780945	0.0183522	0.00351425	0.0109332	0.00468567	0	0.00156189
M207_D0	0	M207	RB07	F	2561	0.987114	142	15.6487	14.423	17.1021	0	0.194455	0.0800469	0	0.0456853	0.0226474	0.0980086	0	0	0.0113237	0.0210855	0.0351425	0.000390472	0.0152284	0.0156189	0	0.00273331	0	0	0.0327997	0.0351425	0.014838	0.00780945	0	0	0.0191332	0.00312378	0.0160094	0.0160094	0	0.00898087	0.00468567	0.00624756	0.00741898	0.0113237	0.00859039	0	0.00312378	0.0128856
M208_D0	0	M208	RB07	F	2561	0.982429	127	6.61139	6.24403	7.02468	0	0.295197	0.0941039	0	0	0.106209	0.204217	0	0	0.00859039	0.014838	0.00468567	0	0.00117142	0.00273331	0	0.00234283	0.000390472	0	0.0230379	0.000390472	0.0238188	0.0124951	0.00117142	0	0.0042952	0.00234283	0.0136665	0.00234283	0	0.00585709	0.00351425	0.000390472	0.00195236	0.0113237	0.00273331	0.00859039	0.00195236	0.00937134
M209_D0	0	M209	RB07	F	2561	0.982038	118	6.14987	5.82206	6.51681	0.00156189	0.309254	0.190551	0	0.00390472	0.0527138	0.158141	0	0	0.00234283	0.0171808	0.00819992	0	0.0105428	0.000780945	0	0.00507614	0	0	0.0261617	0.000780945	0.0304569	0.00585709	0	0	0.00663803	0.00156189	0.00195236	0.000780945	0	0	0.00312378	0.00585709	0.00312378	0.00351425	0.00117142	0.0171808	0.00234283	0.00234283
M188_D1	1	M188	RB07	M	2561	0.985943	120	11.1708	10.4445	12.0057	0.000780945	0.0652089	0.0616947	0.21515	0.151113	0.0179617	0.0773135	0	0	0	0.0253807	0.0113237	0	0.00390472	0.00546661	0	0.00156189	0	0	0.0218665	0	0.000390472	0.0117142	0.0534947	0	0.00507614	0.00741898	0.0109332	0.000780945	0	0.00507614	0	0.000390472	0.0187427	0.00312378	0	0.00624756	0.00859039	0.00624756
M189_D1	1	M189	RB07	M	2561	0.984772	160	16.8685	15.6431	18.3022	0.00117142	0.0515424	0.0370949	0.141742	0.155408	0.00624756	0.0597423	0	0	0	0.028895	0.0249902	0	0.014057	0.00585709	0	0.00546661	0	0	0.0316283	0.00117142	0	0.00390472	0.00468567	0	0.00156189	0.0382663	0	0.0042952	0	0.014057	0.00312378	0.0105428	0.0245998	0.00273331	0.000390472	0.00195236	0.00507614	0.00390472
M190_D1	1	M190	RB07	M	2561	0.9836	154	22.0168	20.5424	23.7191	0.000390472	0.0773135	0.0511519	0.133542	0.0464662	0	0.0117142	0	0	0.000390472	0.0581804	0.0655994	0	0.00898087	0.00546661	0	0.00234283	0	0	0.0589613	0.00195236	0	0.00859039	0	0	0.00195236	0.0331902	0.000390472	0.00117142	0	0.0316283	0.00546661	0.0187427	0.0273331	0.00234283	0.0101523	0	0.00273331	0.00859039
M191_D1	1	M191	RB07	F	2561	0.987895	165	29.109	26.8417	31.7947	0	0.121437	0.0230379	0	0.00780945	0.000780945	0.0468567	0	0	0	0.0730184	0.0402187	0	0.0132761	0.0296759	0	0.000780945	0	0	0.0245998	0.0413901	0.0070285	0.00195236	0.00390472	0	0	0.0187427	0.00156189	0.0308473	0	0.0105428	0.00819992	0.00156189	0.0105428	0.000390472	0.0128856	0	0	0.00624756
M192_D1	1	M192	RB07	F	2561	0.981648	172	24.6543	22.7587	26.8943	0.00312378	0.134323	0.057009	0	0.00195236	0.014057	0.0839516	0	0	0	0.0261617	0.0128856	0	0.0218665	0.0327997	0	0.00273331	0	0	0.0472472	0.0320187	0.0109332	0.00156189	0	0	0.00819992	0.00937134	0	0.0171808	0	0.0503709	0.00819992	0.0234283	0.0136665	0.00117142	0.00859039	0	0.00117142	0.000390472
M193_D1	1	M193	RB07	F	2561	0.984381	161	19.3512	17.76	21.2557	0.000780945	0.172589	0.0882468	0	0.000780945	0.00468567	0.0577899	0	0	0	0.0257712	0.0171808	0	0.0124951	0.0402187	0	0.00273331	0	0	0.0413901	0.0179617	0.00819992	0.00937134	0	0	0.00859039	0.0160094	0	0.0261617	0	0.0316283	0.0167903	0.00351425	0.00507614	0.00117142	0.0070285	0.000390472	0.00351425	0.00273331
M200_D1	1	M200	RB07	M	2561	0.984772	102	7.95336	7.56619	8.38229	0.00351425	0.0870754	0.144865	0.201484	0.219446	0.00390472	0.00898087	0	0	0.000780945	0.00390472	0.0042952	0	0.000390472	0.000390472	0	0.0117142	0	0	0.00741898	0.000390472	0.000390472	0.00976181	0.0331902	0	0.00234283	0.000390472	0.0687232	0.000390472	0	0	0.00937134	0	0.000780945	0.0109332	0	0.0195236	0.0273331	0.0121046
M201_D1	1	M201	RB07	M	2561	0.978524	133	7.92833	7.50077	8.40759	0.00234283	0.101523	0.111675	0.234674	0.209684	0.0390472	0.0187427	0	0	0.000780945	0.00780945	0.0070285	0	0.00156189	0.00117142	0	0.00898087	0	0	0.0300664	0	0.000780945	0.0105428	0.00819992	0	0.00468567	0.00273331	0.00195236	0.00117142	0	0	0.0105428	0	0.000780945	0.00859039	0	0.0132761	0.014057	0.00741898
M202_D1	1	M202	RB07	M	2561	0.984381	144	19.42	18.1918	20.8261	0.00351425	0.0706755	0.0695041	0.128856	0.112456	0.0175713	0.0433424	0	0	0.00312378	0.0167903	0.0468567	0	0.0070285	0.00859039	0	0.00273331	0	0	0.0402187	0.00898087	0.0199141	0.00859039	0.0550566	0	0.0179617	0.00741898	0.0234283	0.0121046	0	0.000390472	0.00976181	0.014057	0.00234283	0.00351425	0	0.00468567	0	0.00976181
M203_D1	1	M203	RB07	M	2561	0.987895	122	11.4978	10.8036	12.2872	0	0.0898087	0.15697	0.185865	0.121046	0.0195236	0.0257712	0	0	0.00234283	0.0152284	0.00937134	0	0.00546661	0.00117142	0	0.00312378	0	0	0.0245998	0	0.0132761	0.0113237	0.00780945	0	0.00351425	0.0253807	0.0152284	0.00156189	0	0	0.00585709	0.00351425	0.0191332	0.00546661	0	0.00859039	0.0160094	0.00273331
M204_D1	1	M204	RB07	M	2561	0.987895	117	6.47853	6.08389	6.92793	0.00156189	0.0995705	0.172589	0.324483	0.0749707	0.00195236	0.0238188	0	0	0.0042952	0.00624756	0.0124951	0	0.00117142	0.00117142	0	0.00117142	0	0	0.0277235	0	0.00663803	0.00546661	0.0171808	0	0.00819992	0.00273331	0.0351425	0	0	0	0.00468567	0.00195236	0.00195236	0.0109332	0	0.0152284	0.00780945	0.00234283
M205_D1	1	M205	RB07	M	2561	0.987114	170	18.8723	17.326	20.7217	0	0.171417	0.101132	0	0.014057	0.00312378	0.0675517	0	0	0.00390472	0.0253807	0.0304569	0	0	0.0113237	0	0.00780945	0	0	0.0460758	0.00507614	0.0070285	0.0070285	0.00117142	0	0.00234283	0.0253807	0.00546661	0.00937134	0	0.0163998	0.00585709	0.00898087	0.00624756	0.00546661	0.0167903	0.00624756	0	0.00624756
M206_D1	1	M206	RB07	F	2561	0.987505	149	12.7751	11.7066	14.0581	0	0.237407	0.0941039	0	0.00156189	0.0136665	0.0675517	0	0	0.0261617	0.0402187	0.00976181	0.000390472	0.0218665	0.00819992	0	0.00234283	0	0	0.0484186	0.000780945	0.00780945	0.00624756	0	0	0.0203046	0.00117142	0.000390472	0.00273331	0	0.00273331	0.00234283	0.00819992	0.0210855	0.00507614	0.00780945	0.00741898	0	0.000780945
M207_D1	1	M207	RB07	F	2561	0.982819	117	7.24958	6.8486	7.70044	0	0.265521	0.0624756	0.000390472	0.106209	0.0581804	0.212807	0	0	0.00156189	0.00507614	0.0124951	0	0.00624756	0.000780945	0	0.00468567	0	0	0.0163998	0.00585709	0.0249902	0.00819992	0	0	0.00624756	0.000780945	0.0413901	0.00351425	0	0.00156189	0	0.00195236	0.00117142	0.00624756	0.00195236	0	0.00585709	0.0117142
M208_D1	1	M208	RB07	F	2561	0.976962	160	10.5108	9.79837	11.335	0.000390472	0.210465	0.0882468	0	0.00351425	0.0378758	0.191332	0	0	0.0124951	0.0128856	0.00507614	0	0.000390472	0.0136665	0	0.00741898	0	0	0.0343616	0.000390472	0.0277235	0.0113237	0.00780945	0	0.0070285	0.00273331	0.0245998	0.00976181	0.000390472	0.00546661	0.00546661	0.00273331	0.00312378	0.0195236	0.0101523	0.00312378	0.0042952	0.0124951
M209_D1	1	M209	RB07	F	2561	0.980086	135	7.10897	6.70078	7.57011	0.000390472	0.284654	0.172589	0	0.0124951	0.0351425	0.15697	0	0	0.000780945	0.00898087	0.00234283	0	0.0121046	0.000780945	0	0.00546661	0	0	0.014838	0.000780945	0.0472472	0.00663803	0	0	0.0070285	0.00117142	0.00234283	0.00273331	0	0.00117142	0.0183522	0.00273331	0.00234283	0.00780945	0.00195236	0.00937134	0.00468567	0.00819992
M188_D2	2	M188	RB07	M	2561	0.985162	126	14.5357	13.5972	15.6134	0.000780945	0.0566185	0.0589613	0.14916	0.160484	0.0327997	0.0800469	0	0	0.000390472	0.0210855	0.0203046	0	0.00624756	0.00663803	0	0.00195236	0	0	0.0484186	0	0	0.0109332	0.0234283	0	0.00312378	0.00859039	0.00898087	0	0	0.00663803	0.00234283	0.000390472	0.0191332	0.00390472	0.000780945	0.00663803	0.00898087	0.00976181
M189_D2	2	M189	RB07	M	2561	0.982429	139	6.81433	6.30977	7.40659	0.028895	0.0558376	0.077704	0.0687232	0.351425	0.00156189	0.0257712	0	0	0	0.00741898	0.00546661	0	0.00117142	0.00234283	0.000780945	0.00780945	0	0	0.0195236	0.00507614	0	0.0300664	0.0691136	0	0	0.0105428	0	0.00390472	0	0.00390472	0.00312378	0.00234283	0.00156189	0.00156189	0	0	0.00937134	0.00585709
M190_D2	2	M190	RB07	M	2561	0.984772	169	24.0332	22.2525	26.1236	0	0.0714565	0.0554471	0.135103	0.020695	0	0.00312378	0	0	0	0.0515424	0.0659898	0	0.0156189	0.0070285	0	0.00195236	0	0	0.0386568	0.00546661	0	0.00663803	0.00195236	0	0.000780945	0.0339711	0.00273331	0.00156189	0	0.0292854	0.000780945	0.0253807	0.0265521	0.00156189	0.00663803	0	0.00312378	0.000390472
M191_D2	2	M191	RB07	F	2561	0.98321	146	11.5915	10.9078	12.3665	0.0113237	0.172979	0.142913	0	0.154627	0.0070285	0.0773135	0	0	0	0.0109332	0.0171808	0	0.0070285	0.0042952	0	0.00859039	0	0	0.0191332	0.0179617	0.0167903	0.0230379	0.0472472	0	0.000390472	0.00390472	0.0160094	0.0117142	0	0.00195236	0.00468567	0.000780945	0.000390472	0.00585709	0.00351425	0.000390472	0.00195236	0.0253807
M192_D2	2	M192	RB07	F	2561	0.985943	147	9.84083	9.16862	10.6194	0.00468567	0.232331	0.187036	0	0.0394377	0.0242093	0.0792659	0	0	0	0.0261617	0.0109332	0	0.00390472	0.00351425	0	0.00859039	0	0	0.0179617	0.00663803	0.0242093	0.0292854	0	0	0.0105428	0.00819992	0	0.00976181	0	0.014838	0.00156189	0.0070285	0.00507614	0.00390472	0.00273331	0	0.00390472	0.00546661
M193_D2	2	M193	RB07	F	2561	0.987895	158	25.5974	23.8286	27.6498	0.00117142	0.122999	0.0581804	0	0	0.00585709	0.0331902	0	0	0	0.0456853	0.0152284	0	0.0117142	0.0136665	0.000390472	0.00234283	0	0	0.070285	0.0285045	0.00663803	0.0218665	0	0	0.00976181	0.00585709	0	0.0195236	0	0.0527138	0.021476	0.00234283	0.00507614	0.0187427	0.00859039	0	0.00624756	0.00937134
M200_D2	2	M200	RB07	M	2561	0.981648	110	9.19742	8.6153	9.8639	0.00546661	0.0609137	0.0874658	0.112066	0.260055	0.0417806	0.00546661	0	0	0.00585709	0.00585709	0.00468567	0	0.000780945	0.00273331	0.000390472	0.00859039	0	0	0.0163998	0	0.00117142	0.0124951	0.0472472	0	0.00273331	0.00195236	0.0913706	0.000780945	0	0.000390472	0.0117142	0	0.000780945	0.0203046	0	0.00312378	0.0343616	0.00156189
M201_D2	2	M201	RB07	M	2561	0.985553	115	7.63006	7.23925	8.06547	0.00585709	0.0601328	0.170636	0.238969	0.188208	0.0175713	0.0105428	0	0	0.00117142	0.00663803	0.0195236	0	0.00156189	0.00195236	0.000390472	0.00273331	0	0	0.0320187	0	0.00390472	0.0199141	0.0484186	0	0.00351425	0.00156189	0.00741898	0.000780945	0	0.000780945	0.00898087	0.00156189	0	0.00780945	0	0.00351425	0.0265521	0.00351425
M202_D2	2	M202	RB07	M	2561	0.982038	125	9.17687	8.70964	9.69708	0.00468567	0.0484186	0.145256	0.126904	0.21515	0.00195236	0.000390472	0	0	0.00390472	0.00741898	0.0109332	0	0	0.00624756	0.000390472	0.00390472	0	0	0.0331902	0.000390472	0.000780945	0.0101523	0.0558376	0	0.00390472	0.00351425	0.131589	0.00663803	0	0	0.0195236	0.00546661	0	0.00585709	0	0	0	0.0277235
M203_D2	2	M203	RB07	M	2561	0.9836	130	8.65169	8.20719	9.14708	0.0628661	0.0816087	0.176884	0.167513	0.207731	0.0124951	0.0277235	0	0	0.00117142	0.00898087	0.00390472	0	0.00156189	0.000390472	0.000390472	0.0105428	0	0	0.00546661	0	0.00273331	0.0152284	0.0163998	0	0.000390472	0.00546661	0.0070285	0.00117142	0	0	0.00156189	0.00234283	0.00468567	0.0042952	0.000390472	0.014838	0.0195236	0.00195236
M204_D2	2	M204	RB07	M	2561	0.981648	112	7.37189	6.98792	7.80051	0.00351425	0.11597	0.200312	0.258493	0.0804373	0.0511519	0.0199141	0.000390472	0	0.00117142	0.00117142	0.0124951	0	0	0.000390472	0	0.00351425	0	0	0.0144475	0	0.0042952	0.0070285	0.0257712	0	0.00312378	0.00351425	0.0659898	0.000780945	0	0	0.0117142	0.00117142	0.000390472	0.00546661	0	0.0105428	0.0136665	0.00156189
M205_D2	2	M205	RB07	M	2561	0.982819	148	12.2591	11.5174	13.1029	0	0.118704	0.172979	0	0.155799	0.00780945	0.0827802	0	0	0.00195236	0.0160094	0.00741898	0	0.000390472	0.00468567	0	0.0117142	0	0	0.0187427	0.00195236	0.0218665	0.0285045	0.0374854	0	0.00195236	0.00546661	0.0187427	0.00312378	0	0.00117142	0.0121046	0.00390472	0.00468567	0.00390472	0.00351425	0.0277235	0.00195236	0.0269426
M206_D2	2	M206	RB07	F	2561	0.983991	152	10.8478	10.071	11.7545	0.000780945	0.235064	0.137837	0	0.00312378	0.0242093	0.110504	0	0	0.00507614	0.028895	0.0175713	0	0.0128856	0.00351425	0	0.00156189	0	0	0.0167903	0.00663803	0.0218665	0.0105428	0	0	0.0308473	0.00351425	0.00234283	0.00195236	0	0.00117142	0.00546661	0.0136665	0.0113237	0.00195236	0.0042952	0.0238188	0.00663803	0.00663803
M207_D2	2	M207	RB07	F	2561	0.986333	126	10.9522	10.2967	11.6968	0	0.201093	0.123389	0	0.0413901	0.0866849	0.14838	0	0	0.00273331	0.014838	0.020695	0	0.0117142	0.00156189	0	0.00585709	0	0	0.028895	0.0117142	0.0179617	0.00351425	0	0	0.0257712	0.0042952	0.0242093	0.0113237	0	0.00273331	0	0.00390472	0.00117142	0.00819992	0.00273331	0	0.0042952	0.0117142
M208_D2	2	M208	RB07	F	2561	0.987505	148	17.2976	15.8957	18.9707	0	0.184303	0.0901991	0	0.00663803	0.0210855	0.0823897	0	0	0.0265521	0.0230379	0.00468567	0	0.00390472	0.0105428	0	0.00273331	0	0	0.0394377	0.000390472	0.028895	0.00663803	0.0226474	0	0.0109332	0.00507614	0.0195236	0.0156189	0	0.014057	0.0042952	0.0042952	0.0199141	0.0167903	0.00468567	0.00741898	0.00234283	0.0117142
M209_D2	2	M209	RB07	F	2561	0.978914	170	16.5016	15.2513	17.9752	0	0.180008	0.0839516	0	0.00156189	0.0456853	0.103085	0	0	0.0160094	0.0515424	0.0238188	0	0.0234283	0.00819992	0	0.00156189	0	0	0.0335806	0.0042952	0.0132761	0.00390472	0	0	0.0253807	0.00468567	0.00117142	0.00312378	0	0.0117142	0.0191332	0.00819992	0.0218665	0.0042952	0.00546661	0.00819992	0.000390472	0.00195236
M188_D3	3	M188	RB07	M	2561	0.984772	142	10.531	9.84055	11.3257	0	0.0480281	0.12417	0.144084	0.224912	0.0464662	0.014057	0	0	0	0.00741898	0.0121046	0	0.00117142	0.0156189	0	0.014838	0	0	0	0	0.000390472	0.00312378	0.028895	0	0	0.00898087	0.0167903	0.00468567	0	0.00234283	0.0210855	0	0.00937134	0.00234283	0	0.0132761	0.0117142	0.00390472
M190_D3	3	M190	RB07	M	2561	0.984772	141	9.27972	8.70142	9.94036	0.000390472	0.0620851	0.117923	0.18196	0.23116	0.0101523	0.0070285	0	0	0	0.00937134	0.0187427	0	0.000390472	0.00976181	0	0.0331902	0	0	0.000390472	0.00624756	0	0	0.014838	0	0	0.0070285	0.0109332	0.00312378	0	0.00195236	0.00273331	0.00546661	0.0070285	0.000390472	0.00117142	0	0.00234283	0.000390472
M191_D3	3	M191	RB07	F	2561	0.98321	139	12.5608	11.8615	13.3478	0.00234283	0.163998	0.110504	0	0.133542	0.00819992	0.113237	0	0	0	0.0187427	0.0187427	0	0.00273331	0.00156189	0.000390472	0.0070285	0	0	0.0171808	0.0175713	0.0253807	0.00859039	0.0292854	0	0.00156189	0.00273331	0.0753612	0.0113237	0	0.000390472	0.00624756	0.000390472	0	0.0195236	0.00312378	0.000780945	0.00898087	0.00468567
M200_D3	3	M200	RB07	M	2561	0.987114	92	6.94216	6.58763	7.33702	0.00117142	0.0464662	0.230769	0.151503	0.246388	0.00585709	0.000390472	0	0	0.00780945	0.00390472	0	0	0.000390472	0.00195236	0	0.0132761	0	0	0.000780945	0	0	0.00819992	0.0320187	0	0	0.00859039	0.0218665	0	0	0	0.00273331	0	0.000390472	0.00741898	0	0.00351425	0.0374854	0.00117142
M201_D3	3	M201	RB07	M	2561	0.982819	164	19.6996	18.2476	21.4028	0.00976181	0.0449043	0.131589	0.13198	0.0808278	0	0.000390472	0.000390472	0	0.00234283	0.0109332	0.0195236	0	0.00351425	0.00663803	0.000390472	0.00507614	0	0	0.0359235	0	0	0.0113237	0.0113237	0	0.00507614	0.0113237	0.0152284	0.00507614	0	0	0.0121046	0.00156189	0.00273331	0.00312378	0	0.000390472	0.0121046	0.0144475
M202_D3	3	M202	RB07	M	2561	0.989848	86	7.06745	6.7745	7.38688	0.000390472	0.0351425	0.208512	0.151503	0.209293	0	0.000390472	0	0	0.00312378	0.00195236	0.000780945	0	0	0.00234283	0.000390472	0.00976181	0	0	0.000780945	0.000390472	0	0.00507614	0.0269426	0	0	0.00117142	0.166341	0.00195236	0	0	0.00898087	0.00819992	0.000390472	0.00585709	0	0	0	0.0042952
M204_D3	3	M204	RB07	M	2561	0.985162	102	6.07627	5.71846	6.48184	0.0101523	0.0898087	0.139399	0.127684	0.340102	0.0136665	0.0124951	0	0	0.00195236	0.00624756	0.00546661	0	0.000390472	0	0	0.00663803	0	0	0.00351425	0.000390472	0.0042952	0.00468567	0.0519328	0	0.000390472	0.00312378	0.0292854	0.000780945	0	0	0.0152284	0.00195236	0.00195236	0.0042952	0	0.0156189	0.0234283	0.00468567
M206_D3	3	M206	RB07	F	2561	0.985162	114	8.09147	7.64119	8.59813	0.0124951	0.226865	0.212417	0	0.014838	0.0367044	0.140961	0	0	0.00273331	0.00819992	0.0042952	0	0.00156189	0.000780945	0	0.00780945	0	0	0.00859039	0.000780945	0.0417806	0.0121046	0.000390472	0	0.0195236	0.000780945	0.0320187	0.00156189	0	0.000390472	0.00859039	0.00624756	0.0042952	0.00585709	0	0.0367044	0.0105428	0.00937134
M207_D3	3	M207	RB07	F	2561	0.981257	166	17.383	16.0362	18.9767	0	0.179617	0.0671613	0.000390472	0.0070285	0.0554471	0.0855135	0	0	0.00312378	0.00898087	0.0324092	0	0.0042952	0.0203046	0	0.00273331	0	0.000390472	0.0534947	0.0527138	0.00624756	0.00156189	0	0	0.0242093	0.0171808	0.00585709	0.0175713	0	0.00624756	0	0.0136665	0.00780945	0.00741898	0.00507614	0	0.000390472	0.00546661
M208_D3	3	M208	RB07	F	2561	0.980476	150	11.4714	10.7756	12.2632	0.00273331	0.145646	0.188989	0.000390472	0.0351425	0.0257712	0.0862944	0	0	0.00507614	0.00585709	0.00507614	0	0.000390472	0.00819992	0	0.00585709	0	0	0.0113237	0.00117142	0.0273331	0.00663803	0.00819992	0	0.00780945	0.00273331	0.133932	0.00937134	0	0.00312378	0.00780945	0.00780945	0.00859039	0.0230379	0.00351425	0.0160094	0.00624756	0.0124951
M209_D3	3	M209	RB07	F	2561	0.982819	160	13.6906	12.7848	14.7344	0	0.147599	0.0343616	0	0.00351425	0.146818	0.14916	0	0	0.00273331	0.0308473	0.0374854	0	0.00117142	0.00976181	0	0.000780945	0	0	0.0285045	0.00898087	0.0277235	0.00507614	0	0	0.0160094	0.0121046	0.0101523	0.00585709	0	0.00585709	0.0101523	0.00663803	0.00195236	0.0042952	0.00780945	0.00546661	0.00234283	0.00312378
M188_D4	4	M188	RB07	M	2561	0.987505	126	11.7294	11.0408	12.5095	0.00195236	0.042171	0.126123	0.142913	0.184693	0.0226474	0.00937134	0	0	0	0.000780945	0.00976181	0	0.00117142	0.0124951	0	0.028895	0	0	0	0	0	0.000390472	0.0351425	0	0	0.00663803	0.0175713	0.0042952	0	0.00117142	0.00859039	0.000780945	0.00156189	0	0	0.0343616	0.00156189	0
M190_D4	4	M190	RB07	M	2561	0.985553	123	8.8732	8.37547	9.43383	0.000780945	0.0402187	0.103866	0.167513	0.23116	0.00507614	0.00390472	0	0	0	0.00546661	0.00546661	0	0.000390472	0.00585709	0	0.0253807	0	0	0	0.00390472	0	0	0.0183522	0	0	0.00585709	0.0070285	0.00351425	0	0.00390472	0.00273331	0.00195236	0.00156189	0.000390472	0	0.00117142	0.0183522	0
M200_D4	4	M200	RB07	M	2561	0.988286	76	5.10752	4.86224	5.37886	0.0152284	0.0300664	0.258493	0.12378	0.328778	0.0402187	0.00117142	0.000390472	0	0.0042952	0.00117142	0	0	0	0.000390472	0	0.00546661	0	0	0.000390472	0	0.00156189	0.00546661	0.0218665	0	0	0	0.00390472	0	0	0	0.000780945	0.00117142	0.00156189	0.00117142	0	0.0070285	0.0296759	0.00117142
M201_D4	4	M201	RB07	M	2561	0.982819	142	19.5507	18.2764	21.0159	0.0179617	0.000780945	0.121046	0.0335806	0.119875	0	0.00156189	0	0	0	0.00937134	0.00117142	0	0.00156189	0.00585709	0	0.00351425	0	0	0.0257712	0	0.00273331	0.0136665	0.0179617	0	0.00468567	0.00937134	0.034752	0.00195236	0	0	0.00234283	0.00117142	0.00390472	0.00976181	0	0.00156189	0.0156189	0.00976181
M202_D4	4	M202	RB07	M	2561	0.986724	114	9.22252	8.59291	9.95169	0.0292854	0.000390472	0.146037	0.00468567	0.263569	0.000390472	0	0	0	0.00546661	0.00273331	0.000780945	0	0	0.0183522	0.00195236	0.00390472	0	0	0	0	0	0.0124951	0.0449043	0	0	0.0160094	0.0878563	0.00546661	0	0	0.000780945	0.0175713	0	0.00234283	0	0.000390472	0	0.00117142
M204_D4	4	M204	RB07	M	2561	0.986724	128	8.33466	7.84193	8.89346	0.00663803	0.0534947	0.209684	0.123389	0.233503	0.0179617	0.0128856	0	0	0.0042952	0.0167903	0.00351425	0	0	0.000780945	0	0.0101523	0	0	0.00351425	0	0.00585709	0.00663803	0.00859039	0	0	0.00819992	0.0132761	0.000780945	0	0	0.0117142	0.0195236	0.00273331	0.00234283	0	0.00624756	0.0312378	0.00507614
M206_D4	4	M206	RB07	F	2561	0.98321	139	8.35803	7.83181	8.96007	0.00273331	0.235845	0.224522	0.0105428	0.0277235	0.00468567	0.0890277	0	0	0.00117142	0.0113237	0.0070285	0	0	0.000390472	0.000390472	0.0101523	0	0	0.0152284	0.00663803	0.0117142	0.0187427	0.0257712	0	0.0124951	0.00468567	0.0203046	0.00195236	0	0.000780945	0.0285045	0.0136665	0.00585709	0.00546661	0.00156189	0.0351425	0.00624756	0.00819992
M207_D4	4	M207	RB07	F	2561	0.980476	159	12.7492	11.9424	13.6729	0	0.18977	0.12417	0.00234283	0.014057	0.102304	0.0933229	0.000390472	0	0.00663803	0.0128856	0.0226474	0	0.00234283	0.00585709	0	0.00351425	0	0	0.0601328	0.0324092	0.0070285	0.00741898	0	0	0.0191332	0.0070285	0.00390472	0.0160094	0	0.00468567	0	0.0117142	0.00234283	0.0171808	0.00273331	0	0.000780945	0.00898087
M208_D4	4	M208	RB07	F	2561	0.988676	97	8.28384	7.88241	8.72834	0	0.143303	0.224131	0	0.17337	0.0132761	0.104256	0	0	0.0316283	0.000780945	0	0	0.000390472	0.00156189	0	0.00117142	0	0	0.00117142	0	0.0413901	0.00390472	0.00624756	0	0.00624756	0.000780945	0.070285	0.00156189	0	0	0.0124951	0.00195236	0.00546661	0.00780945	0.000780945	0.0222569	0.014057	0.0124951
M209_D4	4	M209	RB07	F	2561	0.982038	166	18.9961	17.5911	20.6451	0.00156189	0.161265	0.0433424	0.00117142	0.0363139	0.0816087	0.0831706	0	0	0.00819992	0.056228	0.0265521	0	0.00624756	0.00624756	0	0	0	0	0.0335806	0.00273331	0.0261617	0.00585709	0	0	0.0230379	0.00156189	0.00937134	0.00234283	0	0.0378758	0.00585709	0.00273331	0.0121046	0.00741898	0.00663803	0.00546661	0.00195236	0.00117142
M194_D0	0	M194	RB07+Abx	M	2561	0.995314	70	11.9721	11.2374	12.8095	0.00156189	0.0320187	0.00117142	0.00468567	0.00195236	0.00117142	0.00898087	0	0	0	0.00156189	0	0	0.00273331	0	0.00468567	0	0	0	0	0	0	0	0	0	0	0	0	0	0	0	0	0	0	0	0	0	0.000390472	0
M195_D0	0	M195	RB07+Abx	M	2561	0.9918	58	2.85358	2.69986	3.02587	0	0.0117142	0	0.00898087	0.00117142	0.00859039	0.00663803	0	0	0.572433	0	0	0	0	0	0.00273331	0	0	0	0	0	0	0	0	0	0	0	0	0	0	0	0	0	0.00546661	0	0	0	0	0
M196_D0	0	M196	RB07+Abx	M	2561	0.993362	46	1.25167	1.21952	1.28555	0.00195236	0	0	0.000780945	0	0.000390472	0.000390472	0.000390472	0	0.893401	0	0.000390472	0	0.00741898	0	0.00117142	0.0128856	0	0	0	0	0.00156189	0	0	0	0	0	0	0	0	0	0	0	0	0	0	0	0	0
M199_D0	0	M199	RB07+Abx	F	2561	0.975791	134	7.49034	7.11129	7.91207	0.00234283	0.0859039	0.0546661	0.249512	0.166732	0.0124951	0.00663803	0	0	0.175713	0.00468567	0.00156189	0	0	0	0.00273331	0.00468567	0	0	0.00234283	0	0.00507614	0.00468567	0.00663803	0	0.000390472	0	0.0187427	0	0	0	0.00195236	0	0	0.00741898	0	0.00468567	0.0124951	0.00898087
M210_D0	0	M210	RB07+Abx	F	2561	0.989067	155	22.2397	20.6781	24.0563	0.0581804	0.0605232	0.0257712	0.0503709	0.00937134	0.00976181	0.0527138	0	0.000390472	0	0.00468567	0	0	0	0	0.0105428	0	0	0	0.00117142	0	0.00937134	0	0.00898087	0	0	0	0.00507614	0	0	0	0	0	0	0	0	0.000780945	0.00390472	0.00117142
M211_D0	0	M211	RB07+Abx	F	2561	0.994533	62	12.4051	11.582	13.3543	0.0511519	0.000390472	0	0	0	0.014057	0.0199141	0.000390472	0	0.0277235	0	0	0	0	0	0.0121046	0	0	0.000390472	0	0.000390472	0.00156189	0	0	0	0	0.0117142	0	0	0	0	0	0	0	0	0.0409996	0	0	0
M212_D0	0	M212	RB07+Abx	F	2561	0.987505	94	4.86918	4.62799	5.1369	0.0406091	0.0277235	0	0	0.00234283	0.0983991	0.369387	0	0	0.129246	0.00468567	0.00312378	0	0.199922	0.00234283	0.00273331	0.000390472	0	0	0.000780945	0	0.00117142	0.000390472	0	0	0.00273331	0.00351425	0	0.000390472	0	0	0	0.00312378	0.000780945	0	0.00312378	0.00624756	0	0
M194_D1	1	M194	RB07+Abx	M	2561	0.997657	7	1.0047	1.00097	1.00847	0.997657	0	0	0	0	0	0.000390472	0	0	0	0	0	0	0	0	0	0	0	0	0	0	0	0	0	0	0	0	0	0	0	0	0	0	0	0	0	0	0	0
M195_D1	1	M195	RB07+Abx	M	2561	0.99961	3	1.00235	0.99971	1.005	0.998829	0	0	0	0	0	0	0	0	0	0	0	0	0	0	0	0	0	0	0	0	0	0	0	0	0	0	0	0	0	0	0	0	0	0	0	0	0	0
M196_D1	1	M196	RB07+Abx	M	2561	0.998438	6	1.00943	1.00413	1.01479	0.995314	0	0	0	0	0	0	0	0	0.00312378	0	0	0	0	0	0	0	0	0	0	0	0	0	0	0	0	0	0	0	0	0	0	0	0	0	0	0	0	0
M197_D1	1	M197	RB07+Abx	F	2561	0.998829	5	1.00392	1.00051	1.00735	0.998048	0	0	0.000390472	0	0	0	0	0	0	0	0	0	0	0	0.000390472	0	0	0	0	0	0	0	0	0	0	0	0	0	0	0	0	0	0	0	0	0	0	0
M198_D1	1	M198	RB07+Abx	F	2561	0.985162	75	2.46755	2.40646	2.53182	0.458415	0.00117142	0.0187427	0.00273331	0.00234283	0.00195236	0	0	0	0.000390472	0.00195236	0.000780945	0	0.00507614	0.000390472	0.00156189	0	0	0	0.000390472	0	0.000390472	0	0	0	0.000390472	0.000390472	0	0	0	0.00507614	0	0.000390472	0.000390472	0	0.00156189	0	0	0
M199_D1	1	M199	RB07+Abx	F	2561	0.986333	100	6.15199	5.83576	6.50444	0.313159	0.0515424	0.0398282	0.170636	0.121046	0.000390472	0.0070285	0	0	0.12417	0.00156189	0.00195236	0	0	0	0.00351425	0.00390472	0	0	0.00312378	0	0.00234283	0.0042952	0.00273331	0	0	0.000390472	0.0156189	0.000780945	0	0	0.000390472	0	0	0.00546661	0	0.00234283	0.00507614	0.00195236
M210_D1	1	M210	RB07+Abx	F	2561	0.998438	5	1.00313	1.00008	1.0062	0.998438	0	0.000390472	0	0	0	0.000390472	0	0	0	0	0	0	0	0	0	0	0	0	0	0	0	0	0	0	0	0	0	0	0	0.000390472	0	0	0	0	0	0	0	0
M211_D1	1	M211	RB07+Abx	F	2561	0.997657	7	1.0047	1.00097	1.00847	0.997657	0	0	0.000390472	0	0	0	0	0	0.000390472	0	0	0	0	0	0	0	0	0	0	0	0	0	0	0	0	0	0	0	0	0	0	0	0	0	0	0	0	0
M212_D1	1	M212	RB07+Abx	F	2561	0.984772	70	1.28496	1.25003	1.3219	0.881687	0.021476	0.00819992	0	0.000780945	0.0101523	0.00663803	0.0105428	0	0.00234283	0.00195236	0.00234283	0	0	0.000390472	0.00780945	0	0.0042952	0.00585709	0.000390472	0.00234283	0	0	0.000390472	0.000390472	0.000390472	0.000390472	0	0.000780945	0.00195236	0	0.000390472	0.000780945	0	0.00117142	0.000390472	0	0.00156189	0.00117142
M194_D2	2	M194	RB07+Abx	M	2561	0.995314	16	1.01901	1.01143	1.02669	0.990629	0.000390472	0.00117142	0.00156189	0.00195236	0.000390472	0	0	0	0	0	0.000390472	0	0	0	0	0.000390472	0	0	0	0	0	0	0	0	0	0	0	0	0	0	0	0	0	0	0	0	0	0.000390472
M195_D2	2	M195	RB07+Abx	M	2561	0.998438	7	1.68955	1.63196	1.75135	0.748926	0	0.127294	0	0	0	0	0	0	0	0	0	0	0	0	0.122218	0	0	0	0	0	0	0	0	0	0	0	0	0	0	0	0	0	0	0	0	0	0	0
M196_D2	2	M196	RB07+Abx	M	2561	0.998829	6	1.69709	1.65483	1.74158	0.713003	0	0.00117142	0	0	0	0	0	0	0.000390472	0	0	0	0	0	0.284654	0	0	0	0.000390472	0	0	0	0	0	0	0	0	0	0	0	0	0	0	0	0	0	0	0
M198_D2	2	M198	RB07+Abx	F	2561	0.993752	29	1.22921	1.20028	1.25956	0.898868	0.000390472	0.00780945	0.000780945	0.000780945	0	0	0	0	0	0.00117142	0	0	0.00156189	0.000390472	0.00117142	0	0	0	0.000390472	0.00117142	0	0	0	0	0	0	0	0	0	0.00195236	0	0	0	0	0	0	0	0
M199_D2	2	M199	RB07+Abx	F	2561	0.996876	16	1.10551	1.08694	1.12474	0.95041	0.00195236	0.0359235	0.00117142	0.000780945	0	0	0	0	0	0	0	0	0.00351425	0	0.00234283	0	0	0	0	0	0	0	0	0	0	0	0	0	0	0	0	0	0	0	0	0	0	0
M211_D2	2	M211	RB07+Abx	F	2561	0.998438	5	1.00313	1.00008	1.0062	0.998438	0	0	0.000390472	0	0	0.000390472	0	0	0	0	0	0	0	0	0	0	0	0	0	0	0	0	0	0	0	0	0	0	0	0	0	0	0	0	0	0	0	0
M212_D2	2	M212	RB07+Abx	F	2561	0.996876	11	1.97685	1.94421	2.0106	0.590394	0	0	0	0	0.000390472	0.00976181	0	0	0	0	0	0	0.000390472	0	0.39672	0	0	0	0	0.000390472	0	0	0	0	0	0	0	0	0	0	0	0	0	0	0	0	0	0
M194_D3	3	M194	RB07+Abx	M	2561	0.992191	24	1.03687	1.02621	1.04776	0.982038	0.000390472	0.00273331	0.000390472	0.000390472	0	0	0	0	0.000390472	0.000390472	0	0	0	0.000390472	0.00663803	0	0	0	0	0	0	0	0	0	0	0.000390472	0	0	0	0	0	0	0	0	0	0	0.000390472	0
M195_D3	3	M195	RB07+Abx	M	2561	0.998438	7	2.03488	2.0194	2.0506	0.511519	0	0.4795	0	0	0	0	0	0	0.000390472	0	0	0	0	0	0.00741898	0	0	0	0	0	0	0	0	0	0	0	0	0	0	0	0	0	0	0	0	0	0	0
M196_D3	3	M196	RB07+Abx	M	2561	0.999219	8	1.47708	1.43125	1.52594	0.812183	0.000390472	0	0	0	0	0	0	0	0	0	0	0	0.120656	0	0.0534947	0	0	0	0.000390472	0	0	0	0	0	0	0	0	0	0	0	0	0	0	0	0	0	0	0
M198_D3	3	M198	RB07+Abx	F	2561	0.999219	4	1.83861	1.80194	1.8768	0.649356	0	0	0	0	0	0	0	0.000390472	0	0	0	0	0	0	0.349863	0	0	0	0	0	0	0.000390472	0	0	0	0	0	0	0	0	0	0	0	0	0	0	0	0
M199_D3	3	M199	RB07+Abx	F	2561	0.998438	7	1.63177	1.58923	1.67664	0.739164	0	0.00117142	0	0	0	0	0	0	0	0	0	0	0.000390472	0	0.258102	0	0	0	0	0	0	0	0	0	0	0	0	0	0	0	0	0	0	0	0	0	0	0
M211_D3	3	M211	RB07+Abx	F	2561	0.998048	11	1.01421	1.00768	1.02082	0.992971	0.000780945	0.000390472	0.00117142	0.00117142	0.00117142	0.000780945	0	0	0	0	0	0	0	0	0	0	0	0	0	0	0	0	0	0	0	0	0.000390472	0	0	0	0	0	0.000390472	0	0	0	0	0.000390472
M194_D4	4	M194	RB07+Abx	M	2561	0.998829	5	1.78266	1.74289	1.8243	0.675908	0.000390472	0.322921	0	0	0	0	0	0	0	0	0	0	0	0	0	0	0	0	0	0	0	0	0	0	0	0	0	0	0	0	0	0	0	0	0	0	0	0
M196_D4	4	M196	RB07+Abx	M	2561	0.998048	10	1.81017	1.74511	1.88026	0.71886	0	0.166341	0	0	0	0	0	0	0	0	0.000390472	0	0.0886373	0	0.0160094	0	0	0	0	0	0	0	0	0	0	0	0	0	0	0	0	0	0	0	0	0	0	0
M198_D4	4	M198	RB07+Abx	F	2561	0.998438	7	1.98364	1.94321	2.0258	0.605623	0	0	0	0	0	0	0	0	0	0	0	0	0.0226474	0	0.370168	0	0	0	0	0	0	0	0	0	0	0	0	0	0	0	0	0	0	0	0	0	0	0
M199_D4	4	M199	RB07+Abx	F	2561	0.998438	6	1.67939	1.63722	1.72379	0.719641	0	0	0	0.000390472	0	0	0	0	0	0.000390472	0	0	0	0	0.278797	0	0	0	0	0	0	0	0	0	0	0	0	0	0	0	0	0	0	0	0	0	0	0
M211_D4	4	M211	RB07+Abx	F	2561	0.996486	12	1.01102	1.00528	1.01683	0.994533	0.00117142	0	0.000390472	0.000390472	0	0	0.000390472	0	0	0	0	0	0	0	0	0	0	0	0	0	0	0	0	0	0.000390472	0	0	0	0	0	0	0	0	0	0	0	0	0
M228_D0	0	M228	RB16	M	2561	0.983991	144	21.3809	19.9585	23.0216	0	0.130808	0.0367044	0	0.099961	0.057009	0.056228	0.0624756	0	0	0.028114	0.014057	0.0222569	0	0.0249902	0	0.0124951	0.000390472	0.0398282	0.00624756	0.0070285	0.0273331	0.00546661	0.000390472	0.00937134	0.0167903	0.00819992	0.00507614	0.0152284	0.0222569	0.00156189	0.00312378	0.0128856	0.0042952	0.00624756	0.0273331	0	0.00117142	0
M229_D0	0	M229	RB16	M	2561	0.982038	166	23.2178	21.5961	25.103	0	0.102304	0.0737993	0	0.00156189	0.0484186	0.0156189	0.0511519	0	0	0.0370949	0.0285045	0.120266	0.000780945	0.0136665	0	0.00390472	0.0136665	0.0320187	0.0109332	0.0195236	0.00312378	0.00819992	0.000390472	0.00117142	0.00624756	0.0113237	0	0.0218665	0.0324092	0.000390472	0.0179617	0.00859039	0.00507614	0.0042952	0.00546661	0	0.00351425	0.000780945
M230_D0	0	M230	RB16	M	2561	0.979695	166	19.1146	17.795	20.6456	0	0.101132	0.0796564	0	0.00312378	0.0128856	0.0042952	0.0734088	0	0	0.0124951	0.0452948	0.145646	0.00195236	0.0109332	0	0.00351425	0.0242093	0.0472472	0.00234283	0.0101523	0.00117142	0.00780945	0.000780945	0.021476	0.00819992	0.00859039	0	0.0226474	0.0273331	0.000390472	0.014838	0.00859039	0.00585709	0.00195236	0.00312378	0	0.00351425	0
M231_D0	0	M231	RB16	M	2561	0.984381	152	23.7136	22.0325	25.6726	0	0.0597423	0.0519328	0	0.00351425	0.000390472	0.00117142	0.0402187	0	0	0.0070285	0.0386568	0.128856	0.0152284	0.021476	0	0.00507614	0.000780945	0.0351425	0.00195236	0.00117142	0.0109332	0.00546661	0	0.0312378	0.0234283	0.0070285	0	0.0121046	0.0171808	0	0	0.00741898	0.00351425	0.00195236	0.00156189	0	0	0
M232_D0	0	M232	RB16	M	2561	0.98321	124	13.0449	12.4038	13.7558	0	0.155799	0.092542	0	0.0507614	0.0901991	0.0593518	0.0898087	0	0	0.00976181	0.00898087	0.123389	0.00234283	0.000780945	0	0.0121046	0.0187427	0.0663803	0.00195236	0.00819992	0.0191332	0.0171808	0	0.00312378	0.00234283	0.00546661	0	0.00390472	0.0183522	0	0.00937134	0.00234283	0.00234283	0.00351425	0.00156189	0	0.00741898	0.00156189
M233_D0	0	M233	RB16	F	2561	0.981648	131	10.4871	9.92553	11.116	0.000390472	0.137056	0.0249902	0.194455	0	0.143303	0.0737993	0.0417806	0.0843421	0	0.00546661	0.0117142	0	0.00117142	0.00234283	0	0.00468567	0.0191332	0.0425615	0.000390472	0.00819992	0	0.00937134	0.00390472	0.00390472	0.00898087	0.00156189	0	0.00546661	0.00585709	0.00117142	0	0.00195236	0.000390472	0.014057	0.00312378	0	0.00195236	0.000780945
M234_D0	0	M234	RB16	F	2561	0.982038	144	12.6032	11.8843	13.4146	0	0.125732	0.0163998	0.17376	0.000390472	0.119094	0.0640375	0.0491995	0.0941039	0	0.0105428	0.00468567	0	0.00156189	0.00507614	0.000390472	0.00624756	0.0121046	0.034752	0.000390472	0.0152284	0	0.00624756	0.00312378	0.0171808	0.00741898	0.00273331	0	0.00585709	0.00663803	0	0.00195236	0.00312378	0.0042952	0.00585709	0.00390472	0	0.00273331	0
M235_D0	0	M235	RB16	F	2561	0.978134	172	19.1503	17.9582	20.512	0.000780945	0.0941039	0.00780945	0.117532	0.000390472	0.114408	0.0667708	0.0425615	0.070285	0.000390472	0.0183522	0.0308473	0	0.00351425	0.00663803	0	0.0042952	0.00937134	0.0273331	0.00195236	0.0203046	0.000390472	0.0070285	0.00156189	0.0261617	0.0124951	0.021476	0	0.00741898	0.0042952	0.00312378	0.0136665	0.00780945	0.00273331	0.00780945	0.00546661	0	0.000780945	0
M236_D0	0	M236	RB16	F	2561	0.977743	147	11.7606	11.0968	12.5089	0.000780945	0.0909801	0.014057	0.192503	0.00468567	0.103866	0.117142	0.0515424	0.0921515	0	0.00819992	0.00234283	0	0.000780945	0.00663803	0	0.014838	0.020695	0.042952	0	0	0	0.0156189	0.0136665	0.00741898	0.0105428	0.00507614	0	0.00234283	0.0105428	0.0163998	0.00195236	0.00546661	0.00156189	0.0132761	0.0042952	0	0.000390472	0
M237_D0	0	M237	RB16	F	2561	0.981648	137	11.794	11.0865	12.598	0	0.118704	0.0327997	0.201484	0	0.071066	0.0734088	0.0480281	0.109332	0	0.0042952	0.0113237	0	0	0.000780945	0.00117142	0.0257712	0.0370949	0.0296759	0.00117142	0.00741898	0	0.0070285	0.00312378	0.00898087	0.00976181	0.00195236	0	0.00273331	0.00624756	0.000390472	0.0257712	0.00234283	0.00117142	0.00663803	0.00273331	0.000780945	0.00234283	0.000780945
M243_D0	0	M243	RB16	F	2561	0.981257	171	28.6907	26.7601	30.9214	0.000390472	0.100742	0.071066	0	0.0124951	0.00234283	0.000390472	0.0456853	0	0.00780945	0.0800469	0.0300664	0	0.000390472	0.0312378	0	0.00117142	0	0.0402187	0.00117142	0.0144475	0.00312378	0.0042952	0.000780945	0.0163998	0.0070285	0.0343616	0.00195236	0.0269426	0.0417806	0	0.0113237	0.021476	0.0152284	0.00234283	0.0070285	0	0.00195236	0
M244_D0	0	M244	RB16	F	2561	0.982429	171	24.9658	22.992	27.3102	0.000390472	0.139789	0.0671613	0	0.00976181	0.000780945	0.00195236	0.057009	0	0.00390472	0.0265521	0.0491995	0	0.00117142	0.0437329	0	0.00663803	0.0242093	0.00156189	0.00898087	0.00624756	0.00663803	0.00351425	0.000390472	0.0183522	0.0117142	0.0183522	0.000390472	0.0320187	0.0406091	0	0.00351425	0.0109332	0.00780945	0.00156189	0.0121046	0	0.00195236	0
M245_D0	0	M245	RB16	F	2561	0.980086	166	11.8272	10.9277	12.888	0	0.227255	0.144475	0	0.0203046	0.0331902	0.000390472	0.0792659	0	0.00468567	0.00741898	0.0234283	0	0	0.0156189	0	0.00859039	0.014838	0.0285045	0.00937134	0.00624756	0	0.014838	0	0.0163998	0.00195236	0.0136665	0.00312378	0.0121046	0.00976181	0	0.00546661	0.00859039	0.00546661	0.00234283	0.00937134	0	0.0109332	0.0121046
M246_D0	0	M246	RB16	F	2561	0.978914	170	19.7559	18.3892	21.3421	0.000390472	0.134713	0.0898087	0	0.0042952	0.00507614	0.00507614	0.112456	0	0.00468567	0.0245998	0.0152284	0	0.0203046	0.00976181	0.000390472	0.0109332	0.0484186	0.0042952	0.00351425	0.0343616	0.0460758	0.00898087	0.00273331	0.0167903	0.00663803	0.00351425	0.00468567	0.0117142	0.0210855	0	0.0320187	0.00585709	0.00234283	0.00507614	0.00780945	0	0.0101523	0.035533
M247_D0	0	M247	RB16	M	2561	0.979695	173	20.931	19.334	22.8154	0.000390472	0.0859039	0.0128856	0.152675	0.00156189	0.0249902	0.0316283	0.0273331	0.063647	0.00976181	0.0152284	0.0203046	0	0.00273331	0.0230379	0	0.0042952	0.0171808	0	0.00273331	0.00976181	0	0.0042952	0	0.063647	0.0218665	0.0136665	0	0.0070285	0.00976181	0.042952	0.0113237	0.00624756	0.00780945	0.0070285	0.0152284	0	0	0
M248_D0	0	M248	RB16	M	2561	0.977353	179	17.2575	15.946	18.8041	0.00156189	0.113627	0.0121046	0.171417	0.00468567	0.0277235	0.034752	0.0472472	0.0749707	0.00546661	0.0124951	0.0121046	0	0.000780945	0.020695	0.000390472	0.00976181	0.0363139	0.000780945	0.00117142	0.0191332	0	0.0113237	0.00312378	0.0124951	0.0245998	0.00859039	0	0.00507614	0.0113237	0.00937134	0.0304569	0.00859039	0.00351425	0.0160094	0.0070285	0	0.00468567	0
M249_D0	0	M249	RB16	M	2561	0.980867	157	13.307	12.3978	14.3601	0.000780945	0.13198	0.0659898	0.194065	0.0195236	0.0601328	0.0167903	0.0316283	0.0843421	0.0136665	0.00976181	0.0171808	0	0.000390472	0.00546661	0	0.014057	0.0292854	0.000780945	0.00234283	0.00507614	0	0.0101523	0.00273331	0.0171808	0.0183522	0.00976181	0	0.00234283	0.00937134	0.0152284	0.00898087	0.00546661	0.00390472	0.00273331	0.00234283	0	0.000780945	0
M250_D0	0	M250	RB16	M	2561	0.976962	167	13.4208	12.558	14.411	0	0.133932	0.0441234	0.182741	0.00546661	0.034752	0.0730184	0.0507614	0.091761	0.00546661	0.00780945	0.00859039	0	0.00234283	0.00819992	0.000390472	0.0124951	0.0398282	0.000390472	0.000390472	0.00390472	0	0.0070285	0.00156189	0.0226474	0.0152284	0.0113237	0	0.0042952	0.00898087	0.0136665	0.0113237	0.00976181	0.00312378	0.00937134	0.0101523	0.00117142	0.00234283	0
M228_D1	1	M228	RB16	M	2561	0.983991	118	12.2714	11.6022	13.0225	0.00117142	0.0792659	0.0624756	0.185084	0.000780945	0.0823897	0.123389	0.0402187	0.0675517	0	0.00585709	0.00624756	0	0	0.000780945	0	0.014057	0.0171808	0.0339711	0.000390472	0.00976181	0.00117142	0.0160094	0.0769231	0.00156189	0.0070285	0.00117142	0	0.00273331	0.00546661	0.000780945	0	0.00234283	0.00117142	0.00898087	0.000780945	0.000390472	0.00117142	0.0160094
M229_D1	1	M229	RB16	M	2561	0.982819	173	32.891	30.6644	35.4663	0	0.0550566	0.00390472	0.0964467	0	0.0339711	0.0327997	0.0234283	0.0398282	0	0.0374854	0.0363139	0	0.000390472	0.0245998	0	0.00117142	0.00312378	0.0183522	0.00117142	0.0698946	0	0.000390472	0.00117142	0.0249902	0.0199141	0.0195236	0	0.0144475	0.00663803	0.00234283	0.00234283	0.0195236	0.014838	0.00234283	0.0113237	0	0	0
M230_D1	1	M230	RB16	M	2561	0.980086	154	16.0303	15.0286	17.175	0	0.106209	0.014057	0.153846	0	0.0987895	0.0905896	0.0386568	0.0491995	0	0.0312378	0.0226474	0	0.00156189	0.00859039	0	0.0042952	0.0113237	0.028895	0.000390472	0.0160094	0	0	0	0.000780945	0.00273331	0.0230379	0	0.00507614	0.00390472	0.0042952	0.0070285	0.0183522	0.0117142	0.000780945	0.00351425	0	0.00234283	0
M231_D1	1	M231	RB16	M	2561	0.981648	128	10.3497	9.7289	11.055	0	0.0929324	0.0179617	0.219055	0.0117142	0.0511519	0.146818	0.0542757	0.09918	0	0.00585709	0.00741898	0	0.000390472	0.0109332	0.000390472	0.00819992	0.0222569	0.0265521	0.00117142	0	0	0.00741898	0.00976181	0.00898087	0.0117142	0.00351425	0	0.00273331	0.0167903	0.0105428	0.00117142	0.0070285	0.00273331	0.000390472	0.00390472	0	0	0
M232_D1	1	M232	RB16	M	2561	0.978914	163	19.7474	18.2737	21.4796	0.0105428	0.0878563	0.0320187	0.156579	0	0.0203046	0.0242093	0.0382663	0.0788754	0	0.0070285	0.0238188	0	0.00195236	0.0136665	0.00507614	0.0101523	0.0195236	0.0187427	0.00195236	0.0179617	0	0.00156189	0.0179617	0.0566185	0.0242093	0.00898087	0	0.0109332	0.0070285	0.00195236	0.00741898	0.00624756	0.00546661	0.00312378	0.0210855	0	0.000390472	0
M234_D1	1	M234	RB16	F	2561	0.982429	165	23.1401	21.4747	25.0857	0	0.0898087	0.0706755	0	0.00117142	0.0222569	0.0566185	0.0331902	0	0.000390472	0.0402187	0.0300664	0.131589	0.00156189	0.034752	0	0.00468567	0.0124951	0.0167903	0.000390472	0.014057	0.0042952	0.0070285	0	0.00859039	0.00898087	0.00234283	0	0.0269426	0.0222569	0	0.0163998	0.0144475	0.00624756	0.00195236	0.00312378	0	0.00195236	0.00156189
M235_D1	1	M235	RB16	F	2561	0.980867	175	24.7544	23.0831	26.6866	0.000390472	0.0527138	0.0937134	0	0.103866	0.00780945	0.014838	0.0374854	0.000390472	0	0.00780945	0.0406091	0.0913706	0	0.0163998	0	0.00312378	0.0273331	0.0261617	0.000780945	0.014057	0.00468567	0.0144475	0.00937134	0.014057	0.0117142	0.00273331	0.000390472	0.021476	0.0070285	0	0.00898087	0.0152284	0.00234283	0.0042952	0.00585709	0	0.00312378	0.00234283
M236_D1	1	M236	RB16	F	2561	0.987114	130	13.6283	12.8814	14.4672	0.000780945	0.101913	0.129637	0	0.0808278	0.0316283	0.0132761	0.0909801	0	0	0.0042952	0.014057	0.154627	0.000780945	0.00468567	0	0.0257712	0.0171808	0.0515424	0.00390472	0	0.0402187	0.0121046	0.00156189	0.0109332	0.00663803	0.00195236	0	0.00663803	0.00898087	0.00117142	0	0.00273331	0.00273331	0.00351425	0.000780945	0	0.0042952	0
M237_D1	1	M237	RB16	F	2561	0.982429	128	12.2923	11.6758	12.9776	0.00195236	0.111285	0.14057	0	0.158532	0.0398282	0.085123	0.057009	0	0	0.00585709	0.00624756	0.0835611	0.000780945	0.00273331	0	0.0121046	0.0261617	0.0527138	0.00234283	0.00624756	0.021476	0.0242093	0	0.00117142	0.000780945	0.00351425	0	0.00312378	0.0109332	0	0.00585709	0.00273331	0.00117142	0.00468567	0.00195236	0	0.00390472	0.00585709
M243_D1	1	M243	RB16	F	2561	0.981648	166	23.2127	21.5557	25.1458	0.000390472	0.106599	0.113627	0	0.0222569	0.0191332	0	0.0933229	0	0.0124951	0.0273331	0.0253807	0	0.0042952	0.0304569	0	0	0.0128856	0.0253807	0.00312378	0.0257712	0.00507614	0.00507614	0.0042952	0.0132761	0.0128856	0.00741898	0.0128856	0.028895	0.0374854	0	0.0199141	0.0191332	0.00585709	0.00507614	0.00898087	0	0.00195236	0
M244_D1	1	M244	RB16	F	2561	0.979695	176	19.7049	18.2872	21.3608	0.000390472	0.136665	0.117923	0	0.0538852	0.00624756	0.00780945	0.0890277	0	0.00976181	0.0249902	0.0261617	0	0.00663803	0.0156189	0	0.0304569	0.0304569	0.00585709	0.00468567	0.00976181	0.0167903	0.00468567	0.00156189	0.00156189	0.0128856	0.014838	0	0.0163998	0.0327997	0	0.014838	0.00312378	0.00156189	0.00507614	0.0160094	0	0.00351425	0.00390472
M245_D1	1	M245	RB16	F	2561	0.979695	175	18.8009	17.3998	20.4473	0	0.152675	0.10738	0	0.0109332	0.0175713	0	0.0983991	0	0.00741898	0.0163998	0.0343616	0	0.00195236	0.0316283	0	0.00117142	0.014838	0.0343616	0.0128856	0.0124951	0	0.00624756	0.000390472	0.00468567	0.0121046	0.00780945	0.00234283	0.020695	0.0273331	0.000390472	0.00624756	0.0128856	0.00624756	0.000780945	0.0222569	0	0.00624756	0.00898087
M246_D1	1	M246	RB16	F	2561	0.980476	162	16.1984	15.1256	17.4351	0.000390472	0.13198	0.129246	0.000390472	0.000780945	0.0128856	0.0406091	0.13198	0	0.00234283	0.0144475	0.0121046	0	0.00351425	0.0132761	0	0.00819992	0.0445139	0.00156189	0.00663803	0.00234283	0.042952	0.00546661	0.00234283	0.00468567	0.00898087	0.00663803	0.014838	0.014057	0.0187427	0.000390472	0.0324092	0.00859039	0.00117142	0.00937134	0.0105428	0	0.0230379	0.00195236
M247_D1	1	M247	RB16	M	2561	0.982038	196	32.1999	29.7806	35.047	0.00195236	0.0441234	0.0312378	0.108161	0.0152284	0.0320187	0.0476376	0.0308473	0.070285	0.00390472	0.020695	0.0218665	0	0.00390472	0.0339711	0	0.0136665	0.0273331	0.00117142	0.00156189	0.0109332	0	0.00390472	0.00468567	0.00741898	0.028895	0.0124951	0	0.0070285	0.00741898	0.0300664	0.00741898	0.014057	0.00819992	0.00741898	0.0132761	0.000390472	0	0.000390472
M248_D1	1	M248	RB16	M	2561	0.98321	162	23.7124	22.0635	25.6278	0	0.0816087	0.0167903	0.126904	0.00937134	0.0167903	0.0624756	0.0394377	0.0698946	0.00117142	0.0245998	0.0351425	0	0.00156189	0.0456853	0	0.00741898	0.0183522	0	0.00156189	0.0121046	0	0.00234283	0.00390472	0.0218665	0.0320187	0.0121046	0	0.00898087	0.0070285	0.00390472	0.0121046	0.0132761	0.00819992	0.00273331	0.0113237	0.000780945	0.000780945	0.00195236
M249_D1	1	M249	RB16	M	2561	0.982819	120	11.8746	11.2979	12.5133	0.00312378	0.091761	0.0624756	0.174541	0.0663803	0.120656	0.0944943	0.0437329	0.0960562	0.000390472	0.00468567	0.0136665	0	0.000390472	0.0042952	0	0.0253807	0.0351425	0.000780945	0.00156189	0.00234283	0	0.00468567	0.00937134	0.000780945	0.00507614	0.00312378	0	0.000780945	0.0109332	0.00624756	0.00468567	0.00273331	0.000780945	0.00351425	0.00117142	0	0.00234283	0.00234283
M250_D1	1	M250	RB16	M	2561	0.9754	178	18.5786	17.3749	19.9614	0.000780945	0.057009	0.0409996	0.142132	0.0191332	0.063647	0.103475	0.0531043	0.0823897	0.00117142	0.0124951	0.0121046	0	0	0.0218665	0	0.014057	0.0226474	0.000780945	0.00351425	0.00937134	0.000390472	0.00546661	0.0195236	0.00898087	0.0171808	0.00663803	0	0.00234283	0.0132761	0.0160094	0.0253807	0.0109332	0.00507614	0.00859039	0.00859039	0.00195236	0.000390472	0
M229_D2	2	M229	RB16	M	2561	0.980476	146	13.9841	13.1108	14.9821	0.00468567	0.0890277	0.104256	0.000390472	0.00195236	0.0503709	0.0905896	0.0683327	0	0.00117142	0.00976181	0.014838	0.180008	0	0.00390472	0	0.00234283	0.0277235	0.0394377	0.0109332	0.0042952	0.0160094	0.0171808	0.000390472	0.00195236	0.00390472	0.00390472	0	0.014838	0.0113237	0	0.0245998	0.00741898	0.0042952	0.0117142	0.000390472	0	0.00507614	0.0132761
M230_D2	2	M230	RB16	M	2561	0.981648	141	14.7442	13.8546	15.756	0.0261617	0.057009	0.121046	0	0.163217	0.0238188	0.0242093	0.0683327	0	0	0.0113237	0.00624756	0.0948848	0	0.0070285	0.000780945	0.00585709	0.0531043	0.0437329	0.000390472	0.00468567	0.0128856	0.0398282	0.00741898	0.00273331	0.00156189	0.00117142	0	0.00937134	0.00780945	0	0.00312378	0.0218665	0.00507614	0.00117142	0.00312378	0	0.00195236	0.00273331
M231_D2	2	M231	RB16	M	2561	0.982819	138	14.8767	13.9728	15.9056	0	0.071066	0.0796564	0	0.0398282	0.0987895	0.00351425	0.0929324	0	0	0.00546661	0.057009	0.168294	0.000780945	0.0152284	0	0.00507614	0.0285045	0.0335806	0.00741898	0.00117142	0.0308473	0.00819992	0.000780945	0.0105428	0.0113237	0.00507614	0	0.00663803	0.00663803	0.000390472	0	0.00468567	0.00351425	0.00937134	0.00312378	0	0.00741898	0
M232_D2	2	M232	RB16	M	2561	0.980086	179	22.9286	21.154	25.0283	0.0191332	0.034752	0.116751	0	0.129637	0.0226474	0.0242093	0.0230379	0	0	0.0273331	0.00819992	0.0534947	0	0.0156189	0	0.00468567	0.0257712	0.0226474	0.00819992	0.014838	0.0105428	0.0437329	0.000780945	0.0113237	0.00780945	0.00585709	0	0.0175713	0.0210855	0	0.00195236	0.0175713	0.00976181	0.00390472	0.000390472	0	0.00546661	0.00117142
M233_D2	2	M233	RB16	F	2561	0.9836	129	11.4248	10.7049	12.2485	0.0257712	0.0452948	0.141742	0.209293	0.00390472	0.00351425	0.0862944	0.0179617	0.0831706	0	0.00468567	0.00937134	0	0	0.00663803	0	0.00780945	0.0394377	0.0253807	0	0.0167903	0	0.00780945	0.0437329	0.000390472	0.00937134	0.00117142	0	0.00390472	0.00390472	0.00273331	0.000390472	0.00117142	0.00234283	0.0113237	0.000780945	0.000780945	0.00234283	0.0320187
M234_D2	2	M234	RB16	F	2561	0.979695	181	21.1369	19.6403	22.8805	0.00741898	0.102694	0.0167903	0.133151	0.0070285	0.0156189	0.0812183	0.042952	0.0589613	0	0.0124951	0.0167903	0	0.000390472	0.0167903	0.000390472	0.00234283	0.00819992	0.0195236	0.00156189	0.0480281	0	0.00351425	0.00898087	0.00624756	0.0156189	0.00546661	0	0.0179617	0.00468567	0.00195236	0.0331902	0.0070285	0.00312378	0.0105428	0.00937134	0	0.0042952	0
M235_D2	2	M235	RB16	F	2561	0.977353	156	16.0139	14.893	17.3173	0.000390472	0.0292854	0.0519328	0.135103	0.0273331	0.16556	0.0378758	0.0367044	0.0370949	0	0.0234283	0.00195236	0	0	0.0156189	0	0.00624756	0.00976181	0.0316283	0.00234283	0.0210855	0	0.0152284	0.0601328	0.000390472	0.00156189	0.0203046	0	0.00976181	0.00117142	0.000390472	0.0277235	0.00780945	0.00819992	0.00663803	0.00195236	0.000390472	0.00663803	0
M236_D2	2	M236	RB16	F	2561	0.9754	189	21.9157	20.2416	23.8916	0.000780945	0.0819992	0.0132761	0.14838	0.00585709	0.0589613	0.0160094	0.0320187	0.0566185	0	0.0160094	0.0218665	0	0.00390472	0.020695	0.000390472	0.00507614	0.00937134	0.0249902	0.000390472	0.000390472	0	0.00273331	0.00156189	0.0534947	0.0230379	0.0175713	0	0.00546661	0.0292854	0.0132761	0.000780945	0.0210855	0.00624756	0.00195236	0.0136665	0	0.00195236	0
M243_D2	2	M243	RB16	F	2561	0.980476	151	15.7409	14.7169	16.918	0.00117142	0.122608	0.151894	0	0.11558	0.00195236	0	0.064428	0	0.00390472	0.0269426	0.0132761	0	0	0.0171808	0	0.000780945	0.0222569	0.0230379	0.00195236	0.0218665	0.000780945	0.0132761	0.0359235	0.00468567	0.00507614	0.00663803	0.042952	0.0113237	0.0191332	0	0.0121046	0.0156189	0.00546661	0.00273331	0.00585709	0	0.00780945	0.0136665
M245_D2	2	M245	RB16	F	2561	0.984772	142	14.2983	13.3819	15.3496	0.0620851	0.108161	0.169465	0	0.128465	0.0113237	0.000390472	0.0468567	0	0	0.0070285	0.0160094	0	0.000780945	0.00624756	0.00546661	0.00117142	0.0343616	0.0324092	0.00741898	0.00976181	0	0.0460758	0.0222569	0.0171808	0.00507614	0.00585709	0.00546661	0.0160094	0.00976181	0	0.00234283	0.00937134	0.0042952	0.00195236	0.00312378	0	0.00117142	0.00624756
M246_D2	2	M246	RB16	F	2561	0.98321	143	16.4417	15.3998	17.6348	0	0.106209	0.138618	0	0.0370949	0.0144475	0.0671613	0.128465	0	0.00312378	0.0156189	0.0109332	0	0.00156189	0.00780945	0.000780945	0.0257712	0.0327997	0.0121046	0.00195236	0.000780945	0.0538852	0.00585709	0.0218665	0.00234283	0.00741898	0.00741898	0.00976181	0.00859039	0.0163998	0.000780945	0.00898087	0.0124951	0.00624756	0.00585709	0.00780945	0	0.00390472	0
M247_D2	2	M247	RB16	M	2561	0.970324	159	12.9422	12.1951	13.7867	0.00156189	0.0753612	0.0378758	0.186255	0.0476376	0.0866849	0.09918	0.0616947	0.0921515	0.000390472	0.00546661	0.00780945	0	0	0.00898087	0	0.0199141	0.0382663	0.00117142	0.000390472	0.00156189	0.000390472	0.00468567	0.0304569	0.00819992	0.0101523	0.00234283	0	0.00156189	0.00117142	0.00390472	0.00546661	0.00195236	0.00195236	0.00898087	0.00546661	0.00507614	0.00898087	0.0152284
M248_D2	2	M248	RB16	M	2561	0.975791	181	27.181	25.1869	29.5179	0.000780945	0.071066	0.0160094	0.123389	0.0273331	0.0363139	0.0445139	0.0292854	0.0554471	0	0.028895	0.0331902	0	0.000780945	0.0343616	0	0.00663803	0.0187427	0.000780945	0.00273331	0.00937134	0	0.00468567	0.00937134	0.0320187	0.0203046	0.00898087	0	0.00468567	0.00507614	0.00507614	0.00468567	0.00976181	0.00859039	0.00663803	0.0117142	0.00156189	0.00156189	0.000390472
M249_D2	2	M249	RB16	M	2561	0.981257	176	30.3414	28.2724	32.737	0.00156189	0.0577899	0.0765326	0.0987895	0.0488091	0.00312378	0.0320187	0.0320187	0.0542757	0	0.0163998	0.0175713	0	0.00273331	0.0413901	0	0.00351425	0.0195236	0.00390472	0.00156189	0.0136665	0	0.0101523	0.0136665	0.0070285	0.020695	0.0136665	0	0.00976181	0.0117142	0.00234283	0.0132761	0.0187427	0.0105428	0.00234283	0.00156189	0	0.000390472	0.0183522
M250_D2	2	M250	RB16	M	2561	0.976962	180	33.1173	31.0001	35.5448	0.000390472	0.0573995	0.0144475	0.0819992	0.0226474	0.0417806	0.0386568	0.0253807	0.0386568	0	0.0132761	0.014838	0	0.0042952	0.0449043	0	0.0042952	0.0105428	0	0.000390472	0.0105428	0	0.00117142	0.00780945	0.0780945	0.0136665	0.00780945	0	0.00624756	0.00819992	0.0359235	0.00819992	0.0218665	0.00663803	0.00156189	0.0257712	0.00117142	0.00273331	0
M229_D3	3	M229	RB16	M	2561	0.977743	164	17.9553	16.6346	19.5038	0.000390472	0.0749707	0.064428	0.000390472	0	0.000390472	0.014838	0.0484186	0	0.00390472	0.0648184	0.0409996	0.170636	0.000390472	0.0273331	0	0.000390472	0.0121046	0.0331902	0.000390472	0.0042952	0	0.00546661	0	0.0605232	0.00390472	0.00390472	0	0.0183522	0.0042952	0.000390472	0.0042952	0.014057	0.0109332	0.00156189	0.00507614	0	0.00156189	0.00156189
M231_D3	3	M231	RB16	M	2561	0.982819	157	22.7017	20.8461	24.9199	0.000390472	0.0203046	0.0273331	0	0.0136665	0.0144475	0	0.0285045	0	0.000390472	0.00390472	0.0265521	0.14916	0.000390472	0.042171	0	0	0.0121046	0.0117142	0	0.0105428	0.000780945	0.00351425	0	0.0972276	0.0163998	0.0121046	0	0.0191332	0.00507614	0.000780945	0	0.014838	0.00624756	0.000780945	0.00859039	0	0.00195236	0
M233_D3	3	M233	RB16	F	2561	0.984381	117	12.0514	11.3942	12.789	0.00937134	0.0753612	0.121437	0.187817	0.0320187	0.00390472	0.0737993	0.0511519	0.09918	0	0.00390472	0.00624756	0	0	0.00273331	0	0.0124951	0.0226474	0.0191332	0.000390472	0.0195236	0	0.0191332	0.0433424	0.000780945	0.00976181	0.00117142	0	0.00234283	0.00273331	0.000390472	0.000390472	0.00195236	0.000390472	0.000780945	0	0.00234283	0.0042952	0.0663803
M234_D3	3	M234	RB16	F	2561	0.978134	182	20.773	19.2864	22.5078	0.00234283	0.125732	0.014057	0.12378	0.000390472	0.0718469	0.0234283	0.0163998	0.04959	0.000780945	0.0175713	0.014838	0	0.00156189	0.0265521	0.000780945	0.00234283	0.00663803	0.00741898	0.00234283	0.0550566	0	0.00624756	0.000390472	0.0304569	0.0117142	0.00780945	0	0.0163998	0.00819992	0.00663803	0.0156189	0.0136665	0.00546661	0.00624756	0.0222569	0	0.000780945	0
M236_D3	3	M236	RB16	F	2561	0.979305	181	19.8814	18.3138	21.7425	0.000390472	0.108161	0.0234283	0.155408	0.0124951	0.0163998	0.00507614	0.0367044	0.0780945	0	0.0167903	0.0109332	0	0.00273331	0.0210855	0	0.0117142	0.014057	0.020695	0.00117142	0.00117142	0	0.0070285	0.00195236	0.0367044	0.0109332	0.014057	0	0.0101523	0.0238188	0.0136665	0.00195236	0.0105428	0.00234283	0.00234283	0.021476	0	0	0
M243_D3	3	M243	RB16	F	2561	0.984772	115	7.11906	6.71019	7.58101	0.000390472	0.106989	0.190551	0	0.286216	0.00117142	0.000780945	0.0730184	0	0.00195236	0.0144475	0.000780945	0	0	0.00468567	0.00390472	0.00273331	0.0273331	0.0113237	0.00195236	0.00976181	0.0117142	0.0472472	0.0292854	0.00234283	0.00312378	0.00273331	0.0257712	0.00234283	0.0156189	0	0.00117142	0.00390472	0.00351425	0.00117142	0	0	0.00780945	0.00937134
M246_D3	3	M246	RB16	F	2561	0.976572	160	14.8912	13.8928	16.0441	0.0394377	0.0983991	0.180008	0	0.0882468	0.00663803	0.0343616	0.0894182	0	0.000390472	0.00976181	0.0175713	0	0.00117142	0.00663803	0.000390472	0.0160094	0.0343616	0.00937134	0.00780945	0	0.0210855	0.0105428	0.0449043	0	0.00312378	0.0042952	0.0277235	0.00351425	0.0144475	0.000390472	0.0117142	0.00819992	0.00117142	0.00898087	0.00507614	0	0.0136665	0
M247_D3	3	M247	RB16	M	2561	0.978914	180	31.5813	29.2163	34.3631	0.000780945	0.0413901	0.0218665	0.115189	0.00585709	0.0171808	0.0359235	0.0179617	0.042171	0	0.0249902	0.0359235	0	0.00273331	0.0484186	0	0.00312378	0.0265521	0.00117142	0.00117142	0.00156189	0	0.00234283	0	0.0324092	0.0292854	0.00507614	0.000390472	0.0117142	0.00195236	0.0304569	0.00312378	0.0136665	0.00859039	0.0042952	0.0370949	0.000390472	0.000780945	0
M248_D3	3	M248	RB16	M	2561	0.982819	147	15.1177	14.2269	16.1275	0.000390472	0.0773135	0.0070285	0.153456	0.00117142	0.118313	0.077704	0.0640375	0.0898087	0	0.00976181	0.0144475	0	0.00351425	0.0203046	0	0.00859039	0.0449043	0.000780945	0.00351425	0.0136665	0	0.00390472	0.000780945	0.0042952	0.0203046	0.00351425	0	0.00351425	0.00859039	0.00351425	0.0042952	0.00859039	0.0042952	0.00390472	0.0121046	0.000390472	0.00117142	0
M249_D3	3	M249	RB16	M	2561	0.983991	150	16.455	15.4856	17.5538	0.0257712	0.105818	0.121827	0.125732	0.0464662	0.0909801	0.014057	0.042171	0.0597423	0	0.00585709	0.00819992	0	0.000390472	0.00780945	0	0.00663803	0.0179617	0.00351425	0.00195236	0.00663803	0	0.0195236	0.00859039	0.00819992	0.0191332	0.0042952	0	0.00546661	0.0113237	0.00468567	0.0105428	0.00624756	0.00312378	0.00624756	0.00156189	0	0.00312378	0.00468567
M250_D3	3	M250	RB16	M	2561	0.982819	138	13.278	12.6141	14.0157	0.000390472	0.106209	0.0320187	0.147599	0.0425615	0.125342	0.0886373	0.0671613	0.092542	0	0.00663803	0.00390472	0	0	0.00546661	0	0.0226474	0.0413901	0	0.000780945	0.00312378	0.00156189	0.00663803	0.00273331	0.0105428	0.0070285	0.00117142	0	0.00390472	0.00859039	0.00468567	0.0070285	0.0042952	0.00312378	0.00507614	0.0070285	0.0042952	0.00390472	0.000390472
M229_D4	4	M229	RB16	M	2561	0.982038	139	10.6144	10.0434	11.2544	0.000780945	0.164389	0.122608	0	0.00390472	0.000780945	0.0121046	0.0769231	0	0	0.0437329	0.0187427	0.185084	0.000780945	0.00117142	0	0.00468567	0.0374854	0.0792659	0.0042952	0.00351425	0.000390472	0.0152284	0	0.014057	0.00312378	0.00507614	0	0.00546661	0.000780945	0.000390472	0.00390472	0.00312378	0.00156189	0.00624756	0.0070285	0	0.00351425	0.034752
M231_D4	4	M231	RB16	M	2561	0.981257	153	21.6435	20.3081	23.1668	0.000390472	0.0948848	0.0675517	0.000390472	0.0698946	0.0195236	0.00156189	0.0640375	0	0	0.000780945	0.0359235	0.117923	0.000390472	0.0171808	0	0.0132761	0.0285045	0.0550566	0.0152284	0.0199141	0.00351425	0.0105428	0	0.028895	0.0195236	0.00507614	0	0.0109332	0.0117142	0	0	0.00585709	0.0042952	0.000780945	0.0124951	0	0.00273331	0
M233_D4	4	M233	RB16	F	2561	0.980867	161	16.7922	15.5734	18.2179	0.0109332	0.0819992	0.0804373	0.174541	0.0234283	0.021476	0.0503709	0.0378758	0.0835611	0	0.00741898	0.0203046	0	0	0.0121046	0.000390472	0.00624756	0.0195236	0.020695	0.00585709	0.00195236	0.00117142	0.0101523	0.00780945	0.00312378	0.0195236	0.0070285	0	0.0117142	0.0136665	0.00312378	0.00819992	0.00468567	0.00234283	0	0.00312378	0.00117142	0.00546661	0.000390472
M234_D4	4	M234	RB16	F	2561	0.979305	146	10.9497	10.3046	11.6809	0.0042952	0.162437	0.0242093	0.189379	0.00859039	0.125342	0.0249902	0.0327997	0.0905896	0	0.0136665	0.00624756	0	0	0.00546661	0	0.00585709	0.0167903	0.00273331	0.00195236	0.0261617	0	0.00468567	0.00234283	0.00507614	0.0226474	0.00741898	0	0.0070285	0.00585709	0.0070285	0.00663803	0.00624756	0.000390472	0.0105428	0.00546661	0	0.00468567	0
M236_D4	4	M236	RB16	F	2561	0.979695	161	19.065	17.6217	20.766	0.000390472	0.101132	0.0136665	0.160875	0.0124951	0.0488091	0.00273331	0.0327997	0.0722374	0	0.0277235	0.0109332	0	0	0.0230379	0	0.00663803	0.0257712	0.0245998	0.000390472	0.0132761	0	0.0070285	0.000780945	0.035533	0.0203046	0.0156189	0	0.00546661	0.0230379	0.0187427	0.000780945	0.0199141	0.00819992	0.0042952	0.0171808	0	0	0
M243_D4	4	M243	RB16	F	2561	0.982819	145	9.3591	8.76899	10.0344	0.0296759	0.100351	0.188598	0.000390472	0.229988	0.00117142	0.000390472	0.0273331	0	0.00195236	0.0265521	0.00273331	0	0	0.00780945	0.0101523	0.00156189	0.00195236	0.0070285	0.000390472	0.00663803	0.0070285	0.0589613	0.0160094	0	0.00312378	0.00273331	0.0163998	0.0156189	0.0218665	0	0.00156189	0.0210855	0.00390472	0.000780945	0	0	0.00546661	0.00195236
M246_D4	4	M246	RB16	F	2561	0.981257	159	11.331	10.5907	12.1826	0.124951	0.0706755	0.212027	0	0.131199	0.000780945	0.0121046	0.0499805	0	0	0.0191332	0.00234283	0	0.000390472	0.00741898	0.00663803	0.00859039	0.020695	0.00859039	0.00312378	0	0.0152284	0.014057	0.0136665	0.000780945	0.00195236	0.0070285	0.00898087	0.00780945	0.0144475	0	0.00273331	0.00937134	0.0042952	0.00663803	0.00390472	0	0.00585709	0
M248_D4	4	M248	RB16	M	2561	0.981257	179	32.168	30.1021	34.5383	0	0.0464662	0.0109332	0.0862944	0.00546661	0.0796564	0.0394377	0.0390472	0.0546661	0.000390472	0.00898087	0.0339711	0	0.00234283	0.0394377	0	0.00351425	0.028895	0.000780945	0.00351425	0.021476	0	0.00234283	0.000780945	0.0238188	0.0257712	0.0109332	0	0.00741898	0.00898087	0.0121046	0.0042952	0.0171808	0.00976181	0.00468567	0.0183522	0.000390472	0.000780945	0.000390472
M249_D4	4	M249	RB16	M	2561	0.985943	179	39.0731	36.6156	41.8843	0.00117142	0.0464662	0.0640375	0.0616947	0.0390472	0.000390472	0.000780945	0.0230379	0.0406091	0.000780945	0.0128856	0.0132761	0	0.00117142	0.0652089	0	0	0.0187427	0.00156189	0.00273331	0.0367044	0	0.0183522	0.00195236	0.0163998	0.0218665	0.00390472	0	0.0128856	0.00976181	0.00273331	0.00585709	0.0253807	0.0113237	0.0042952	0.00585709	0	0.00195236	0.000780945
M250_D4	4	M250	RB16	M	2561	0.980086	142	11.9728	11.3557	12.6607	0	0.0937134	0.0171808	0.155018	0.0409996	0.153846	0.111675	0.0523233	0.0855135	0	0.0128856	0.0156189	0	0.000390472	0.00780945	0	0.0105428	0.0409996	0.000390472	0.000390472	0.000780945	0.00234283	0.00468567	0.00273331	0.00390472	0.00898087	0.00234283	0	0.00312378	0.00859039	0.000390472	0.00351425	0.00507614	0.00351425	0.00195236	0.00585709	0.0042952	0.00468567	0
M224_D0	0	M224	RB16+Abx	M	2561	0.978914	138	2.90222	2.74008	3.08475	0.572433	0.0929324	0.0167903	0.0167903	0.00351425	0.00273331	0.0042952	0.035533	0	0.0773135	0.00273331	0.000780945	0	0.000390472	0.00117142	0	0.000390472	0.00585709	0.00741898	0.000780945	0.0042952	0	0.00273331	0.000780945	0.00273331	0.00117142	0.00468567	0	0.00117142	0.00507614	0.000780945	0.000390472	0.000780945	0.00351425	0.000780945	0.000780945	0	0.00195236	0.00351425
M225_D0	0	M225	RB16+Abx	M	2561	0.986333	134	6.38349	5.90901	6.94081	0.0042952	0.00117142	0.000780945	0.000780945	0	0.00273331	0.00937134	0	0	0.367825	0.00390472	0	0	0	0	0.00195236	0.00312378	0	0.000390472	0.000390472	0	0.0070285	0	0	0	0	0	0	0	0.00976181	0	0	0	0	0	0	0	0	0.00351425
M226_D0	0	M226	RB16+Abx	M	2561	0.976962	180	10.1549	9.32924	11.1409	0	0.0121046	0.00156189	0.00195236	0	0.0761421	0.0163998	0.00195236	0	0.276845	0.0113237	0.00663803	0.00234283	0.00117142	0.00273331	0.0124951	0.00234283	0	0.00156189	0	0.00312378	0.000780945	0.00117142	0	0.000390472	0	0.00390472	0	0.000780945	0.0593518	0	0	0.00273331	0.00234283	0.000390472	0	0	0.000390472	0
M239_D0	0	M239	RB16+Abx	F	2561	0.98321	170	21.1285	19.7761	22.6794	0.0187427	0.0878563	0.0191332	0.0808278	0.0203046	0.0378758	0.0491995	0.0320187	0.0331902	0.00976181	0.00585709	0.0042952	0	0.000390472	0.00663803	0.00234283	0	0.00937134	0.0113237	0.000780945	0.00819992	0.00507614	0.000390472	0.000780945	0.00624756	0.00351425	0.00312378	0	0.00507614	0.0113237	0.00234283	0.000780945	0.00195236	0.000780945	0.00156189	0	0.000390472	0.00117142	0
M240_D0	0	M240	RB16+Abx	F	2561	0.982819	174	22.0601	20.5755	23.7754	0.0163998	0.0913706	0.116751	0.0390472	0.0218665	0.0538852	0.0257712	0.0546661	0.020695	0	0.00156189	0.00898087	0	0.000390472	0.00351425	0.00780945	0.00273331	0.0296759	0.00234283	0.00312378	0.00546661	0.00585709	0.00390472	0.00468567	0	0.0070285	0	0.0179617	0.00663803	0.00624756	0.00156189	0.00312378	0.00819992	0.00195236	0.0124951	0.00351425	0	0.00117142	0.00234283
M241_D0	0	M241	RB16+Abx	F	2561	0.986333	128	9.88928	9.32793	10.5225	0.00234283	0.0905896	0.00351425	0.228036	0.00585709	0.0987895	0.0316283	0.0597423	0.127294	0.0765326	0.0042952	0.00741898	0	0	0.00156189	0.00234283	0.00234283	0.0327997	0.000780945	0	0.000780945	0.00312378	0.00156189	0	0.00507614	0.00156189	0.00273331	0	0	0.00819992	0	0.00156189	0.00156189	0.00156189	0.00117142	0.0042952	0.00351425	0	0
M223_D1	1	M223	RB16+Abx	M	2561	0.998438	6	1.0047	1.00097	1.00847	0.997657	0.000780945	0	0	0	0.000390472	0	0	0	0	0	0	0	0	0	0	0	0	0	0	0	0	0	0	0	0	0	0	0	0	0	0	0	0	0	0	0	0	0
M224_D1	1	M224	RB16+Abx	M	2561	0.994924	28	1.15801	1.13451	1.1825	0.928153	0.0456853	0.000390472	0	0	0.00234283	0.00234283	0.00117142	0	0.000390472	0.00273331	0.000390472	0	0	0	0.000780945	0	0	0	0	0	0	0	0	0	0	0	0	0	0	0	0	0	0	0	0	0.00117142	0	0
M225_D1	1	M225	RB16+Abx	M	2561	0.99961	3	1.00235	0.99971	1.005	0.998829	0	0	0	0	0	0	0	0	0.000780945	0	0.000390472	0	0	0	0	0	0	0	0	0	0	0	0	0	0	0	0	0	0	0	0	0	0	0	0	0	0	0
M226_D1	1	M226	RB16+Abx	M	2561	0.996876	10	1.00786	1.00302	1.01274	0.996095	0.000390472	0	0.000780945	0	0	0.000390472	0	0	0	0	0	0	0	0	0	0	0	0	0	0	0	0	0	0	0	0	0	0	0	0	0	0	0	0	0	0	0	0
M227_D1	1	M227	RB16+Abx	M	2561	1	2	1.00156	0.999412	1.00372	0.999219	0	0	0	0	0	0	0	0	0	0	0	0	0	0	0	0	0	0	0	0	0	0	0	0	0	0	0	0	0	0	0	0	0	0	0	0	0	0
M238_D1	1	M238	RB16+Abx	F	2561	0.996876	9	1.00628	1.00196	1.01064	0.996876	0.000390472	0	0	0	0	0	0	0	0	0.000390472	0	0	0	0	0	0	0	0	0	0	0	0	0	0	0.000390472	0	0	0	0	0	0	0	0	0	0	0	0	0
M239_D1	1	M239	RB16+Abx	F	2561	0.999219	3	1.00156	0.999412	1.00373	0.999219	0	0	0	0	0	0	0	0	0	0	0	0	0	0	0	0	0	0	0	0	0	0	0	0	0.000390472	0	0	0	0	0	0	0	0	0	0	0	0	0
M240_D1	1	M240	RB16+Abx	F	2561	0.998829	4	1.00235	0.99971	1.005	0.998829	0	0	0	0	0	0	0	0	0	0	0	0	0	0.000390472	0	0	0	0	0	0	0	0.000390472	0	0	0	0	0	0	0	0	0	0	0	0	0	0	0	0
M241_D1	1	M241	RB16+Abx	F	2561	0.999219	3	1.00156	0.999412	1.00373	0.999219	0	0	0	0	0	0	0	0	0	0	0	0	0	0	0	0	0	0	0	0	0	0	0	0	0	0	0	0	0	0	0	0	0	0	0	0	0	0
M242_D1	1	M242	RB16+Abx	F	2561	0.993362	23	1.03034	1.0207	1.04017	0.985162	0.00312378	0.00195236	0	0.000390472	0.000390472	0	0.000780945	0	0	0	0.000390472	0	0	0.000390472	0	0	0	0.000390472	0.000390472	0.000390472	0	0.00156189	0	0	0	0	0	0	0	0	0	0	0	0	0	0	0	0
M224_D2	2	M224	RB16+Abx	M	2561	0.998829	4	1.00235	0.99971	1.005	0.998829	0	0	0	0	0	0	0	0	0	0	0	0	0	0	0	0	0	0	0	0	0	0	0	0	0	0	0	0	0	0	0	0	0	0	0	0	0	0
M226_D2	2	M226	RB16+Abx	M	2561	0.998438	5	1.00313	1.00008	1.0062	0.998438	0	0	0	0	0	0	0	0	0	0	0	0	0	0	0	0.000390472	0	0	0	0	0.000390472	0	0	0	0.000390472	0	0	0	0	0	0	0	0	0	0	0	0	0
M238_D2	2	M238	RB16+Abx	F	2561	0.998438	5	1.00313	1.00008	1.0062	0.998438	0	0	0.000390472	0.000390472	0	0	0.000390472	0	0.000390472	0	0	0	0	0	0	0	0	0	0	0	0	0	0	0	0	0	0	0	0	0	0	0	0	0	0	0	0	0
M239_D2	2	M239	RB16+Abx	F	2561	0.999219	3	1.00156	0.999412	1.00373	0.999219	0	0.000390472	0.000390472	0	0	0	0	0	0	0	0	0	0	0	0	0	0	0	0	0	0	0	0	0	0	0	0	0	0	0	0	0	0	0	0	0	0	0
M241_D2	2	M241	RB16+Abx	F	2561	0.998438	5	1.00313	1.00008	1.0062	0.998438	0	0.000390472	0.000390472	0	0	0	0	0	0	0	0	0	0	0	0	0	0	0	0	0	0	0	0	0	0	0	0	0	0	0	0	0	0	0	0	0	0	0
M242_D2	2	M242	RB16+Abx	F	2561	0.998048	7	1.00628	1.00196	1.01063	0.996876	0.000390472	0.000390472	0	0	0	0	0	0	0	0	0.000390472	0	0	0	0	0	0	0	0	0	0	0	0	0	0	0	0	0	0	0	0	0	0	0	0	0	0	0
M224_D3	3	M224	RB16+Abx	M	2561	1	2	1.07529	1.06005	1.09097	0.963686	0	0	0	0	0	0	0	0	0	0	0	0	0	0	0	0.0363139	0	0	0	0	0	0	0	0	0	0	0	0	0	0	0	0	0	0	0	0	0	0
M226_D3	3	M226	RB16+Abx	M	2561	0.999219	5	1.92122	1.8542	1.99327	0.68567	0	0.130418	0	0	0	0	0	0	0	0	0	0	0	0	0	0.183132	0	0	0	0	0	0	0	0	0	0	0	0	0	0	0	0	0	0	0	0	0	0
M238_D3	3	M238	RB16+Abx	F	2561	0.99961	4	1.00392	1.00051	1.00735	0.998048	0	0	0.000780945	0	0	0	0	0.000780945	0	0	0	0	0	0	0	0	0	0	0	0	0	0	0	0	0	0	0	0	0	0	0	0	0	0.000390472	0	0	0	0
M241_D3	3	M241	RB16+Abx	F	2561	0.99961	3	1.00235	0.99971	1.005	0.998829	0.000780945	0	0	0	0	0	0	0	0	0	0	0	0	0	0	0	0	0	0	0	0	0	0	0	0	0	0	0	0	0	0	0	0	0	0	0	0	0
M242_D3	3	M242	RB16+Abx	F	2561	1	1	1	1	1	1	0	0	0	0	0	0	0	0	0	0	0	0	0	0	0	0	0	0	0	0	0	0	0	0	0	0	0	0	0	0	0	0	0	0	0	0	0	0
M224_D4	4	M224	RB16+Abx	M	2561	0.999219	4	1.64394	1.60189	1.68825	0.733307	0	0	0	0	0	0	0	0	0	0	0	0	0	0	0	0.265912	0	0	0	0	0	0	0	0	0	0	0	0	0	0	0	0	0	0	0	0	0	0
M226_D4	4	M226	RB16+Abx	M	2561	0.99961	4	2.36737	2.29759	2.44152	0.563842	0	0.287778	0.000390472	0	0	0	0	0	0	0	0	0	0	0	0	0.147989	0	0	0	0	0	0	0	0	0	0	0	0	0	0	0	0	0	0	0	0	0	0
M238_D4	4	M238	RB16+Abx	F	2561	0.998438	6	1.00549	1.00145	1.00956	0.997267	0	0	0	0.000390472	0.00117142	0	0.000390472	0	0	0	0	0	0	0	0	0	0	0	0	0	0	0	0	0	0	0	0	0	0	0	0	0	0	0	0	0	0	0
M242_D4	4	M242	RB16+Abx	F	2561	0.999219	4	1.00313	1.00008	1.0062	0.998438	0.000780945	0	0.000390472	0	0	0.000390472	0	0	0	0	0	0	0	0	0	0	0	0	0	0	0	0	0	0	0	0	0	0	0	0	0	0	0	0	0	0	0	0
[truncated: 2,045 more columns]
