# Supplementary material for: A plasmid locus associated with Klebsiella clinical infections encodes a microbiome-dependent gut fitness factor
Source: PLoS Pathog. 2021 Apr 30;17(4):e1009537. doi: 10.1371/journal.ppat.1009537 (PMC8115787; doi:10.1371/journal.ppat.1009537)
Supplement: S5 Table — (XLSX) [file ppat.1009537.s034.xlsx]

## Sheet: S6 Table
S5 Table - Primers used in this study
Primer	Sequence	Purpose
TerC TOPO Fwd	CGTTGCCGCCTTTAGAGAGTG	Amplify terC gene for TOPO cloning
TerC TOPO Rev	CCGGCTGAATTTGGCCTCTG	Amplify terC gene for TOPO cloning
TerOp TOPO Fwd	TGGTCAATGATGCCGGATAG	Amplify terZ-F genes for TOPO cloning
TerOp TOPO Rev	ATCTGCGTATAGCCCTGTTTA	Amplify terZ-F genes for TOPO cloning
TerC Seq Fwd	CCGACATGACAAGCCAATTTC	Verification of terC insert
TerC Seq Rev	TCCACTACAGCCACACATAAC	Verification of terC insert
TerOp Seq Fwd	GTCGCCTGAAAAGGGGATGAG	Verification of terZ-F insert
TerOp Seq Rev	GCAGATCCCGCCATCTGTAATG	Verification of terZ-F insert
